# Supplementary material for: Reliability of high-quantity human brain organoids for modeling microcephaly, glioma invasion and drug screening
Source: PubMed Central journal article supplement (PMC11659410; doi:10.1038/s41467-024-55226-6), 2024-12-19
Supplement: 41467_2024_55226_MOESM1_ESM.pdf [file 41467_2024_55226_MOESM1_ESM.pdf]

**Supplementary information**  
**Figure legend (Supplementary)**

**Fig. S1**

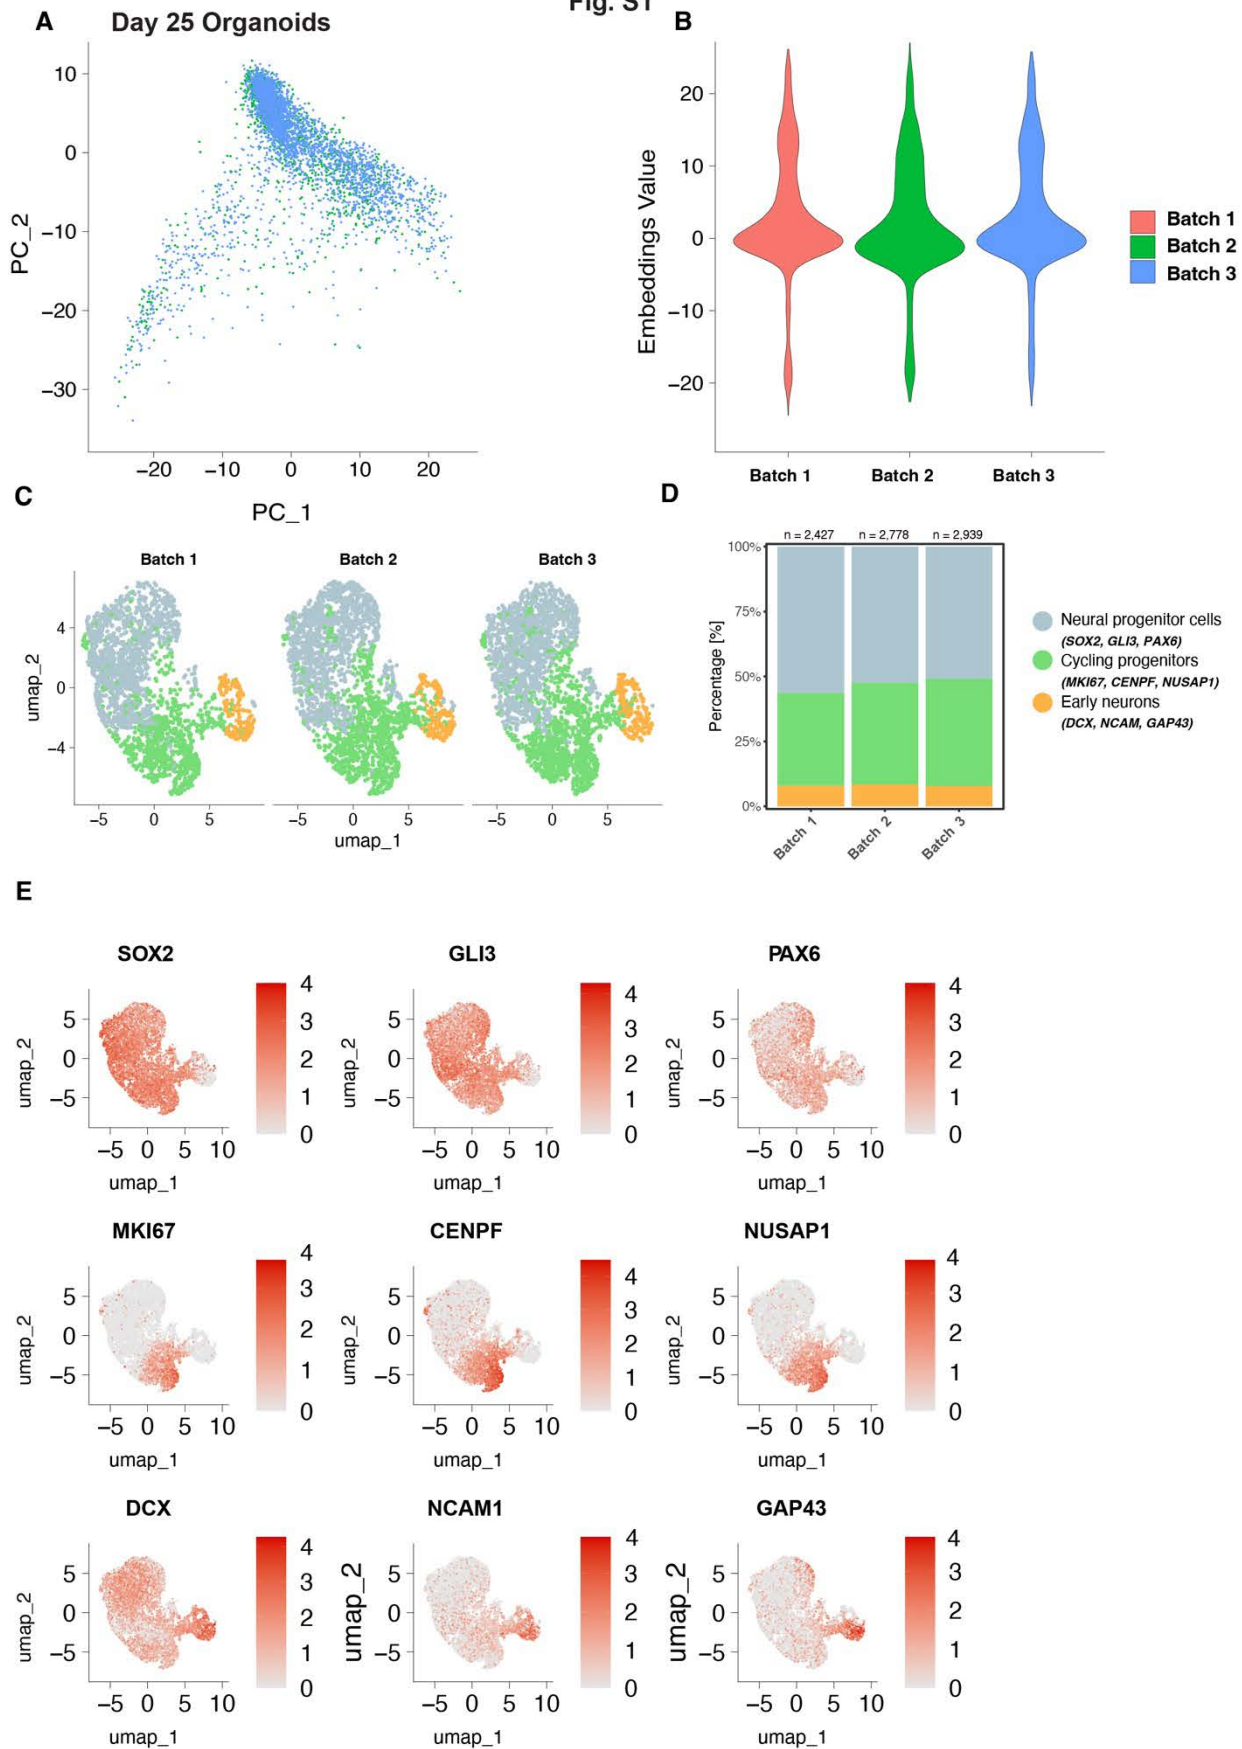

**Figure S1: Testing batch-to-batch variations in Hi-Q brain organoids (Related to Figure 2).**

**A-B.** Diagnostic (**A**) and a violin plot (**B**) of principal component (PC) analysis of sc-RNA transcriptomes from three independent batches of Hi-Q brain organoids representing cells. The batch effect is not apparent as all medians of samples are close to zero.

**C.** UMAP visualization and annotated cell types in three different batches.

**D.** Proportions of cells in each type showing no significant differences, confirming low batch-to-batch variation in terms of cell types and their proportions.

**E.** Feature plot of cells positive for individual marker genes used to identify and annotate cell types.

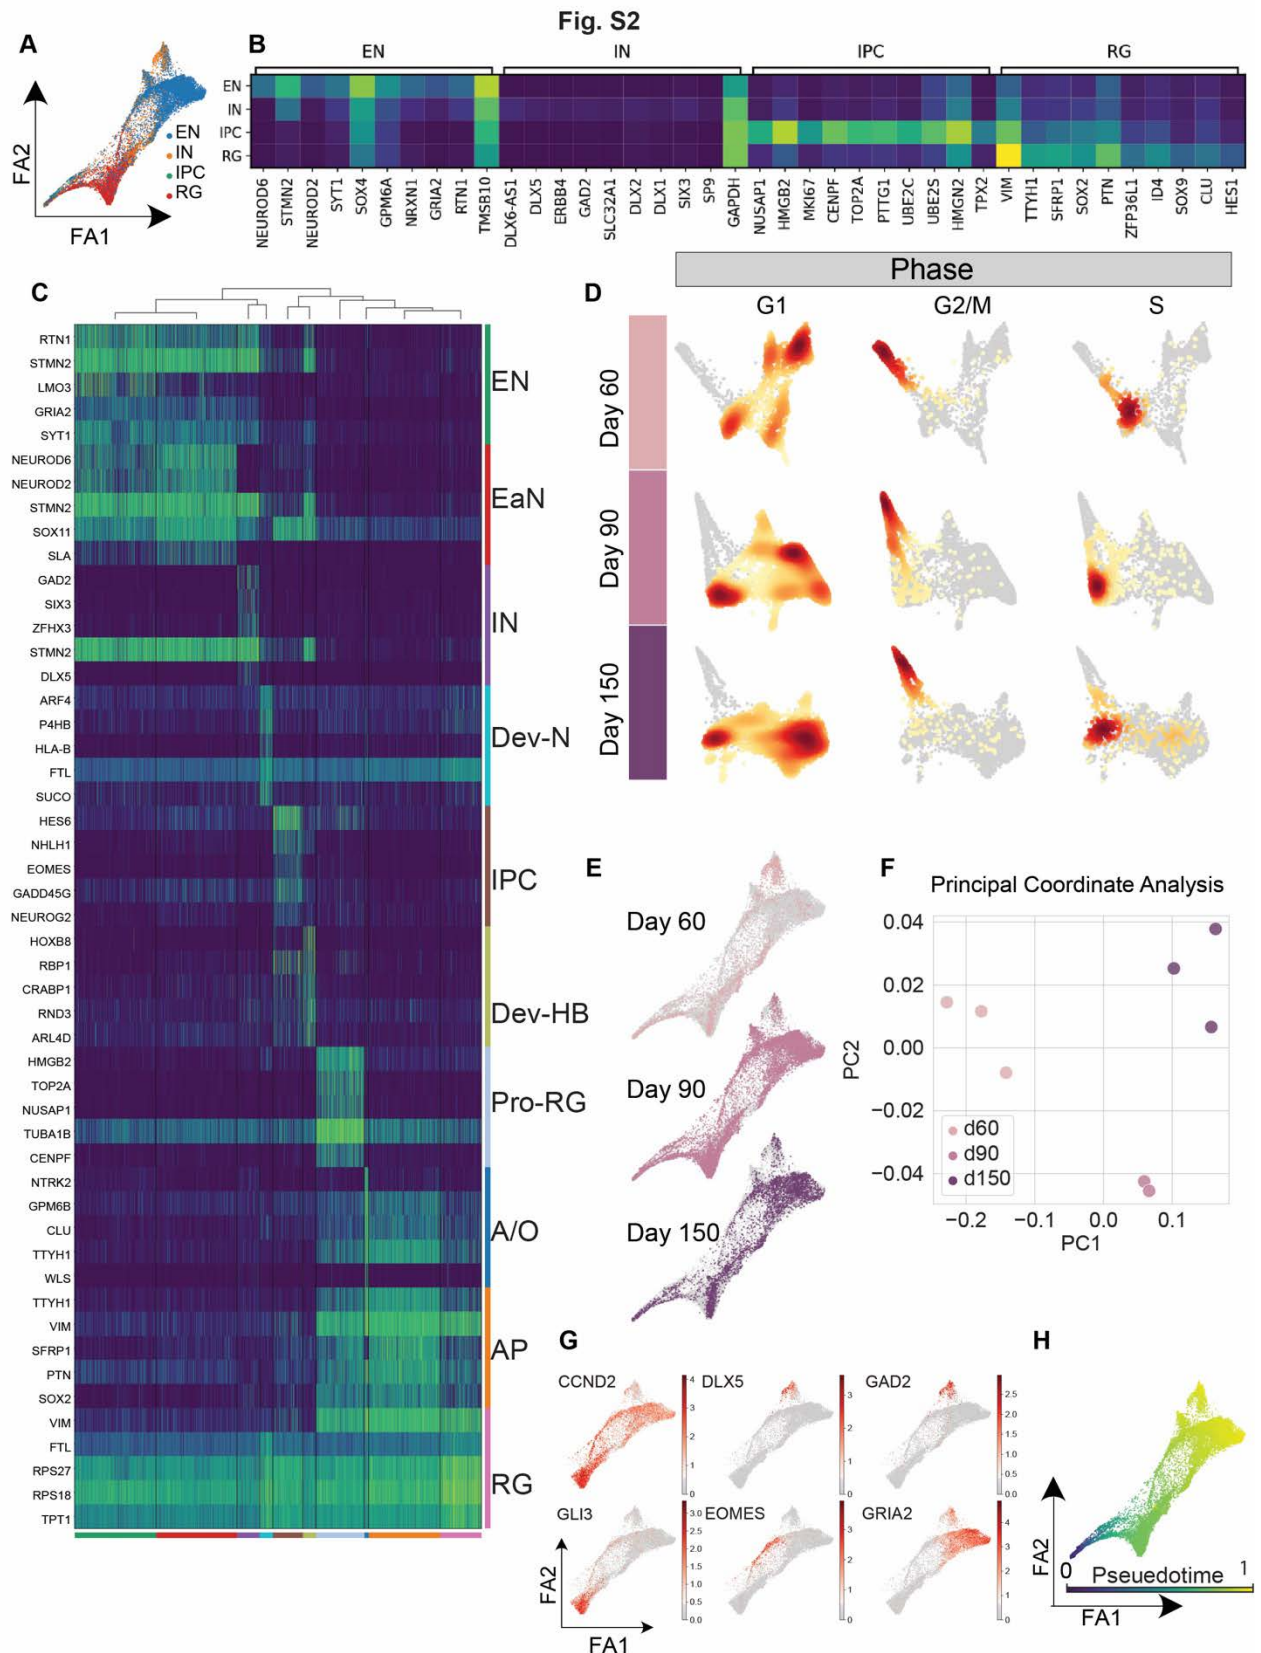

**Figure S2. Cell type heterogeneity in Hi-Q brain organoids across different time points of maturation (Related to Figure 2).**

**A.** Force Atlas (FA) 2D representation of the neighbor graph of Hi-Q brain organoids from day 60, day 90, and day 150 datasets with cell type predicted labels.

**B.** Matrixplot showing the average gene expression of the marker genes (top 10) of each cell type label in the integrated dataset. Markers are calculated by pairwise Wilcoxon rank sum test of each group against the rest of the cells.

- C.** Heatmap showing the expression of marker genes calculated on unbiased Leiden clustering.
- D.** FA embedding of day 60, day 90, and day 150 separately indicates the density of cells expressing markers characteristic of cell-cycle stages.
- E.** FA embedding of the integrated datasets highlighting cells from different collection time points.
- F.** Scatterplot reporting each dataset in the function of the first two principal coordinates (PC) calculated from the proportion of cell types predicted in each batch of Hi-Q brain organoids.
- G-H.** FA embedding of the integrated dataset subset. Cells are highlighted by the expression of ventral telencephalon development markers (CCND2, DLX5, and GAD2) and dorsal telencephalon development markers (GLI3, EOMES, and GRIA2). **(H)** FA embedding of the whole integrated dataset is highlighted by the diffusion pseudotime score computed, setting the Pro-RG cluster as the root.

Fig. S3

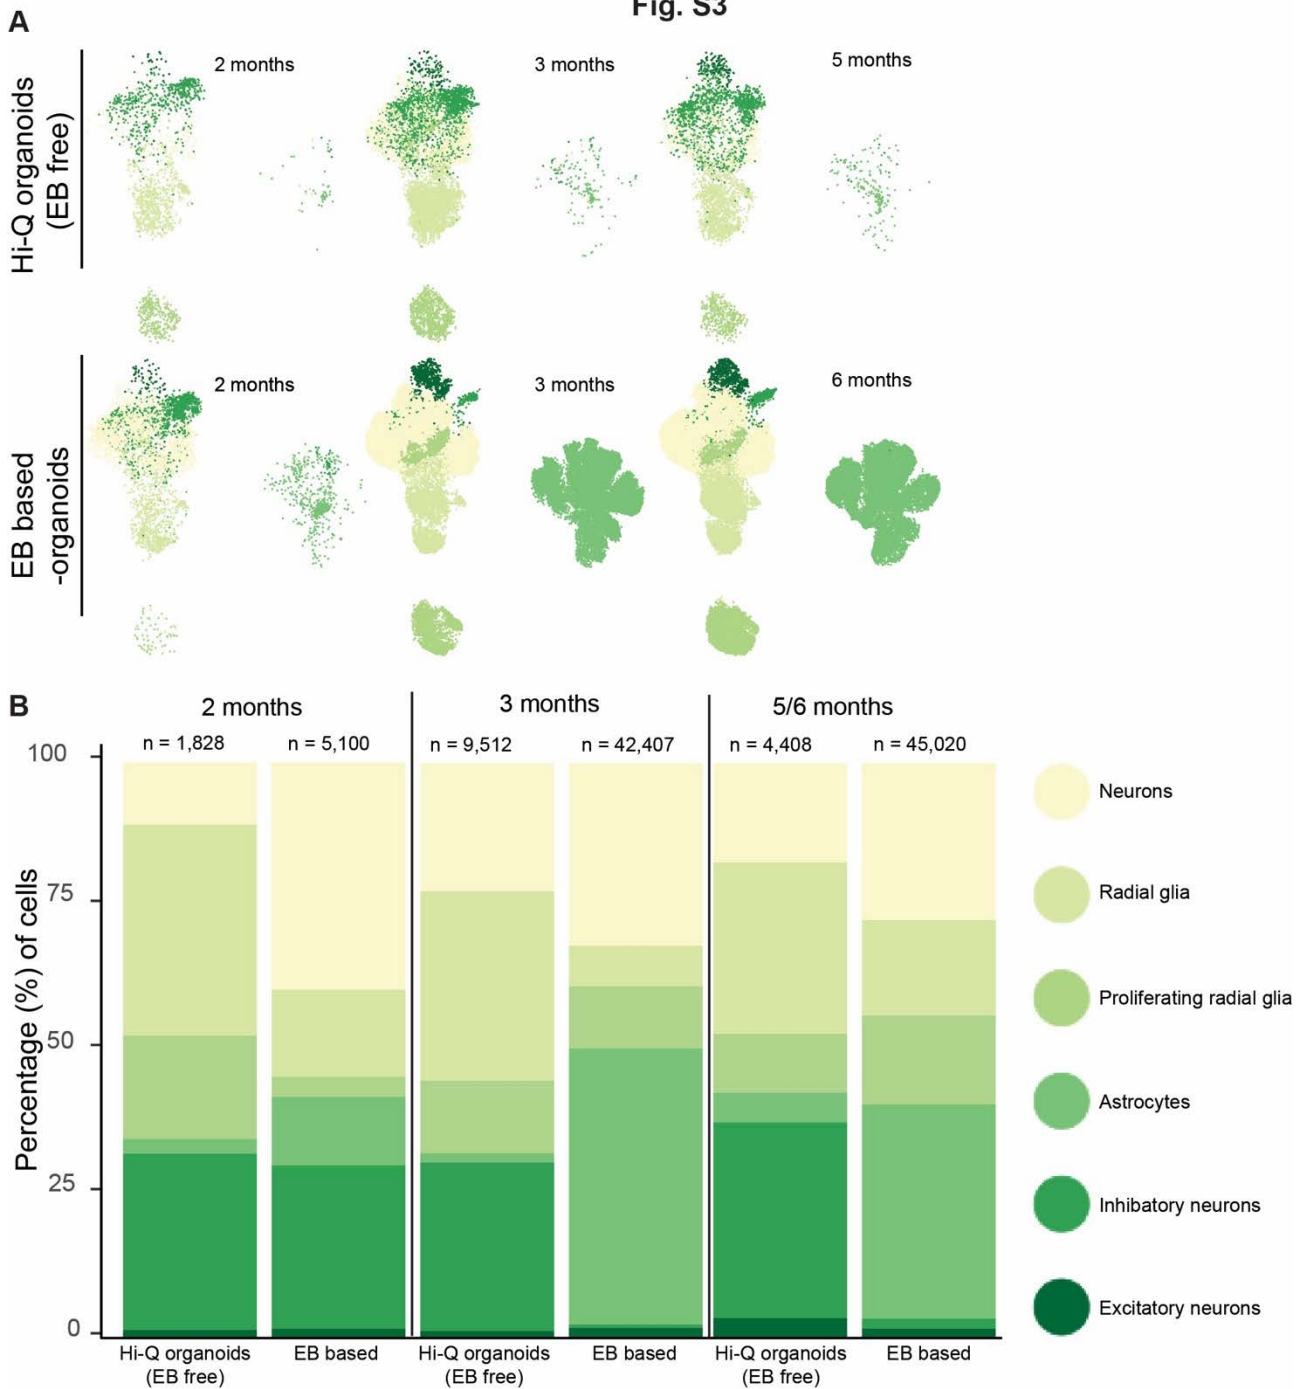

**Figure S3. Cell type heterogeneity in Hi-Q brain organoids compare to EB-based brain organoids.**

**A.** UMAP projection of the clusters representing assigned cell types across different types of age-matched organoids.

**B.** Bar plot depicting the proportions of assigned cell types in each organoid dataset, representing cell type heterogeneity.

**Fig. S4, Related to main figure 3**

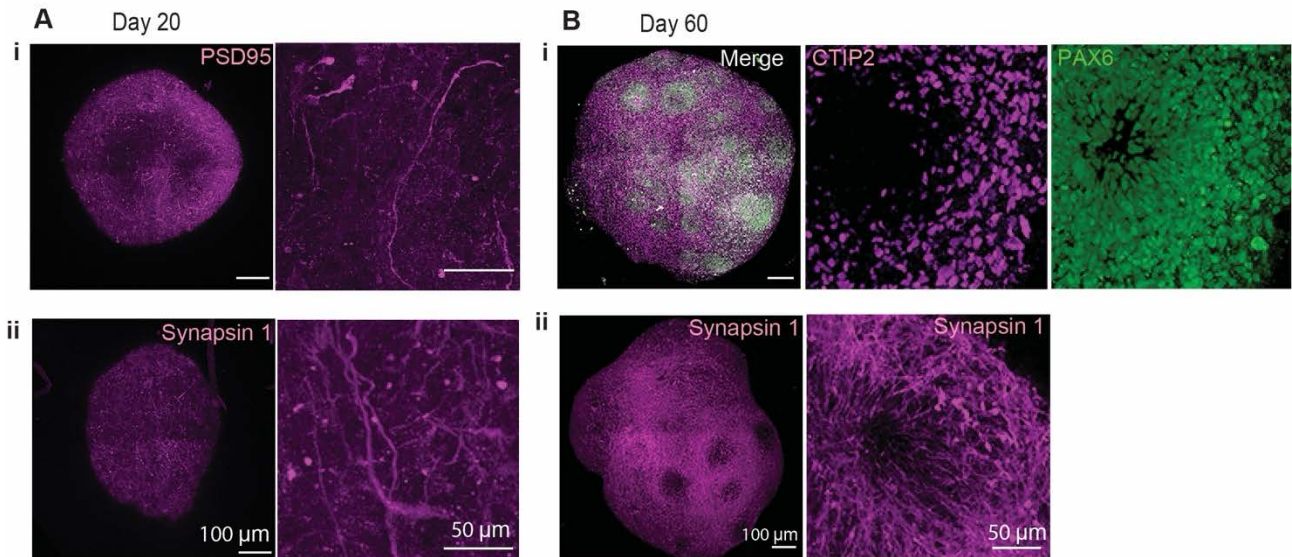

**Figure S4: Hi-Q brain organoids mature over time (Related to Figure 3)**

**A-B.** Tissue clearing and wholemount staining of day 20 (**Ai-ii**) and 60-day (**Bi-ii**) old Hi-Q brain organoids show the presence of PSD95 (magenta), CTIP2 (magenta), Synapsin 1(magenta), and PAX6 (green). Representative images are shown, and panels show scale bars.



Fig. S5, Related to main figure 3

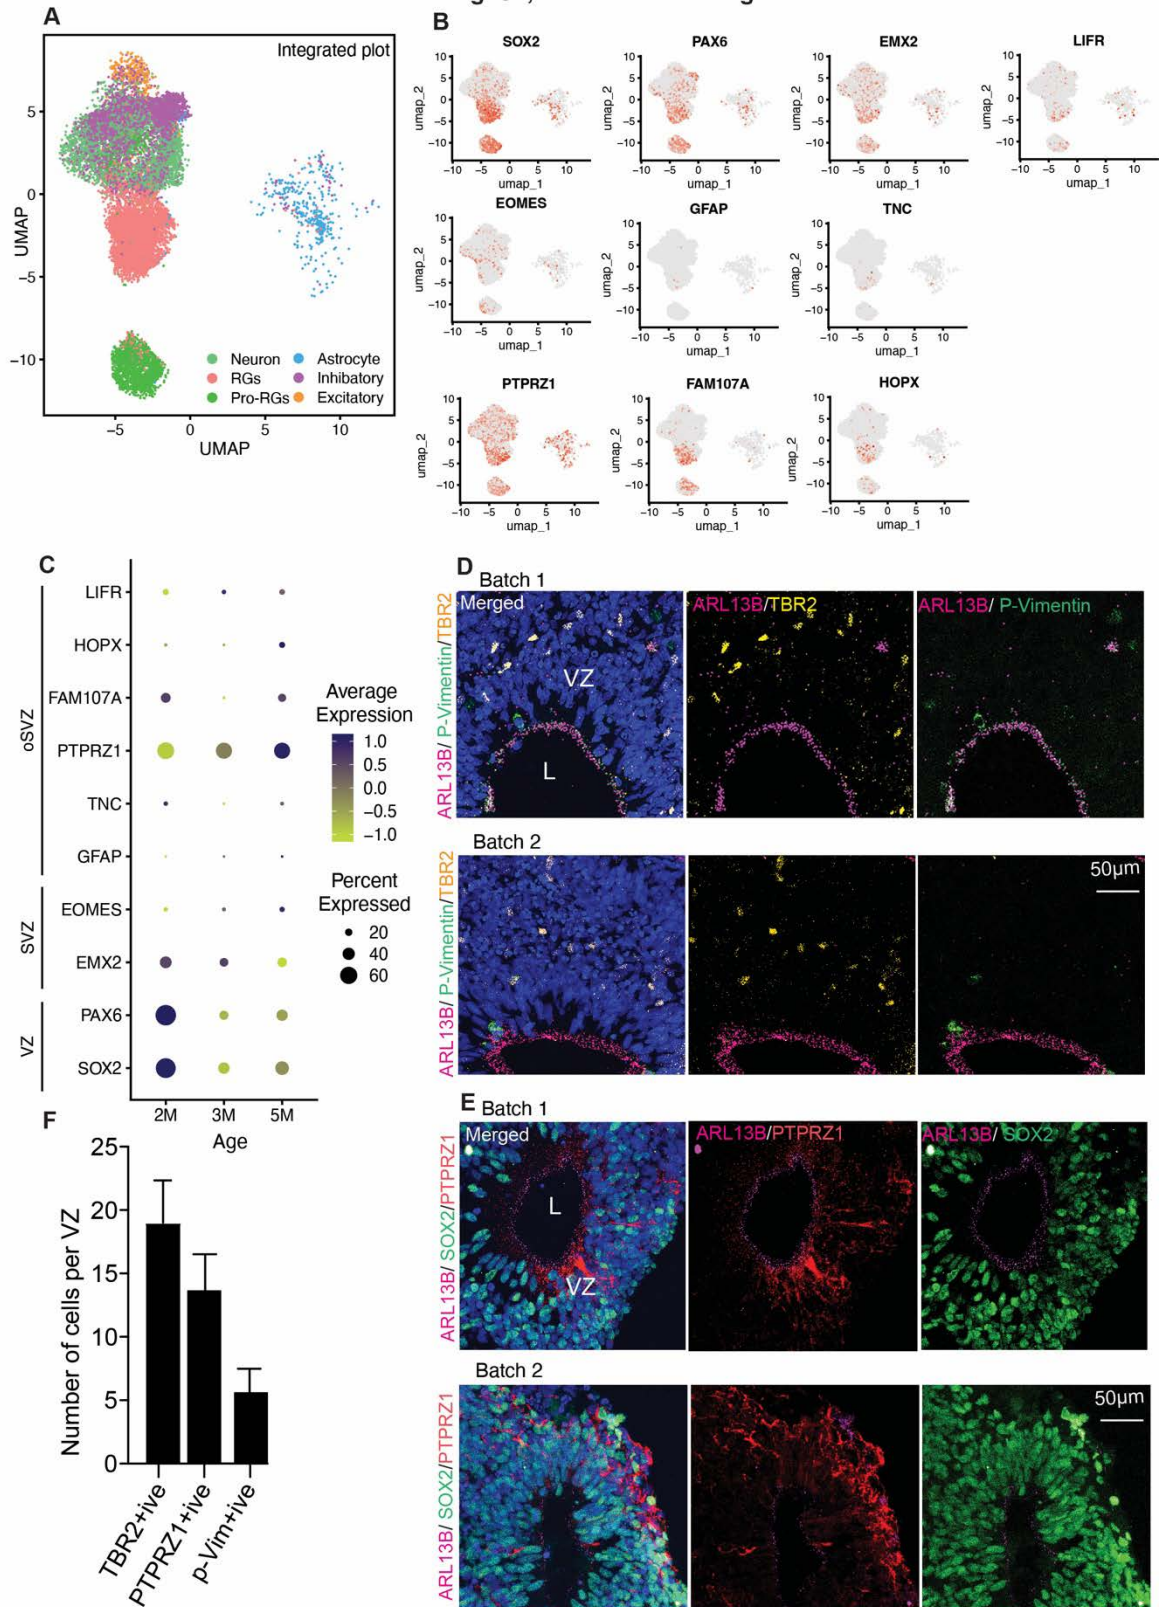

**Figure S5: Layer identities in the ventricular zones of Hi-Q brain organoids.**

**A.** UMAP visualization single-cell data showing six significant types of cell clusters (Color-coded).

**B.** Feature plots of annotated cell types positive for individual markers of VZ, SVZ, and oSVZ.

**C.** Dot plots displaying the marker expression levels across various age groups.

**D.** Immunofluorescence validation for the presence of various markers in organoid thin sections. In all cases, ARL13B (Magenta) labels primary cilia at the VZ lumen (L) at the apical side. TBR2

(Yellow) marks the distribution of intermediate progenitors, specifying the presence of sVZ, and p-Vimentin (green) marks outer radial glial cells that are basal to the VZ. P-Vimentin data in this figure should be combined with **Figure 6Ei**. Two representative illustrations from at least two independent batches of 60-day-old Hi-Q brain organoids. Scale bar 50  $\mu$ m.

**E.** Immunofluorescence validation for the presence of PTPRZ1 (Red) specifying oSVZ. ARL13B (Magenta) labels primary cilia at the apical side of the VZ lumen (L). SOX2 (Green) marks the distribution of VZ progenitors. Two representative figures are given from at least two independent batches of organoids—scale bar 50  $\mu$ m.

**F.** The bar diagram below shows the average number of each cell type quantified from at least six organoids (n=6) from two independent batches.



**Fig. S6 (related to main figure 5)**

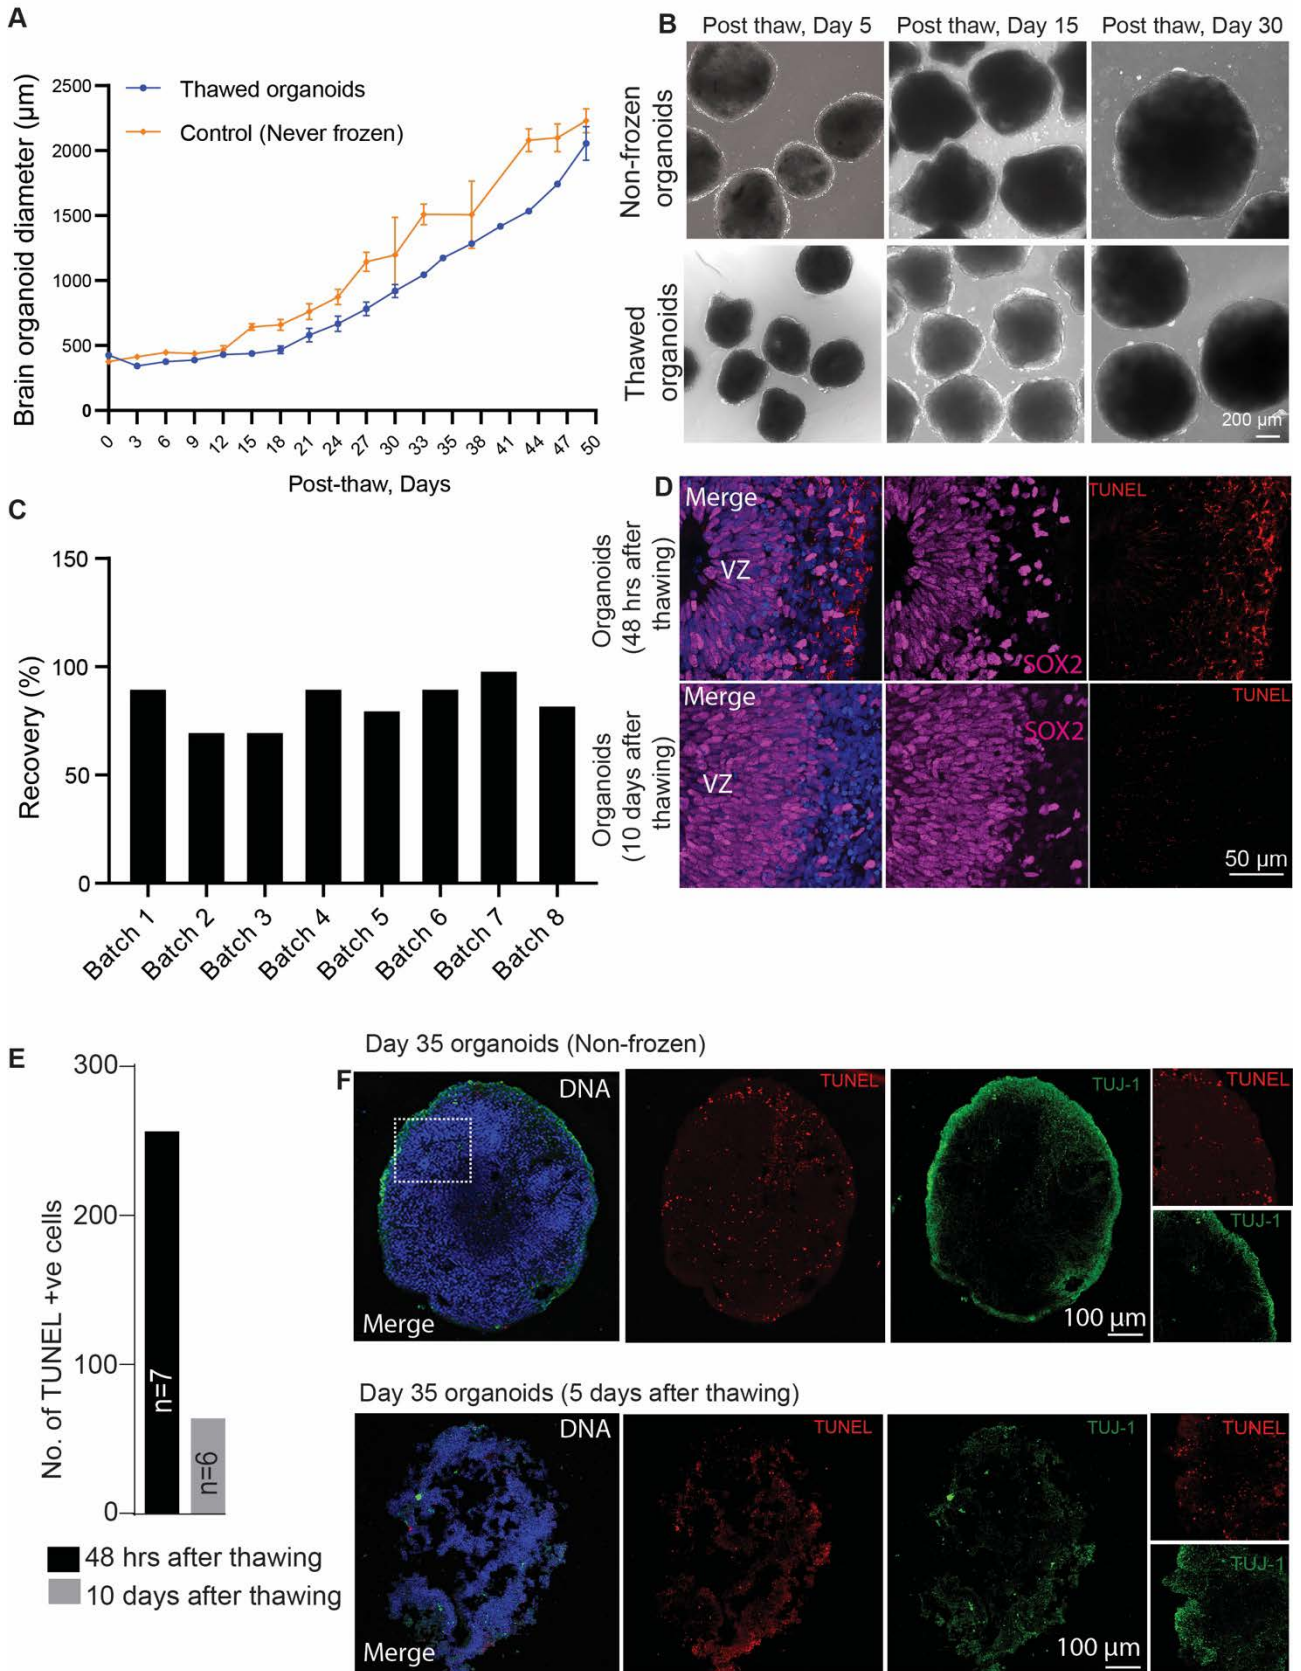

**Figure S6: Cryopreservation, thawing, and re-culturing of Hi-Q brain organoids (Related to Figure 5)**

**A.** Growth kinetics of thawed Hi-Q brain organoids (blue line) compared to control organoids (orange line) that have never been frozen. Each time point shows the average diameter of at least four organoids.

**B.** Macroscopical images of thawed Hi-Q organoids at various time points compared to control organoids that have never been frozen. Scale bar 200  $\mu\text{m}$  shown in the panel.

**C.** Percentage recovery of thawed brain organoids from at least eight batches. Each batch contained at least ten brain organoids.

**D.** Cytoarchitectural analysis of thawed organoids after 48 hrs (top panel) and 10 days (bottom panel). SOX2 (magenta) specifies developing VZ, and TUNEL labels dead cells (red). The panel shows a scale bar.

**E.** Bar diagram counts TUNEL-positive cells between organoids 48 hrs and ten days after thawing of Hi-Q organoids. The number of organoids used in each experiment is denoted by "n."

**F.** Unlike Day 18 Hi-Q organoids, thawed Day 35 organoids did not display an intact cytoarchitectural organization. In addition, thawed organoids contained massively elevated TUNEL-positive cells. TUNEL (red) labels dead cells. TUJ1 (green) labels neurons. The panel shows a scale bar.

**Fig. S7, Related to main figure 6**

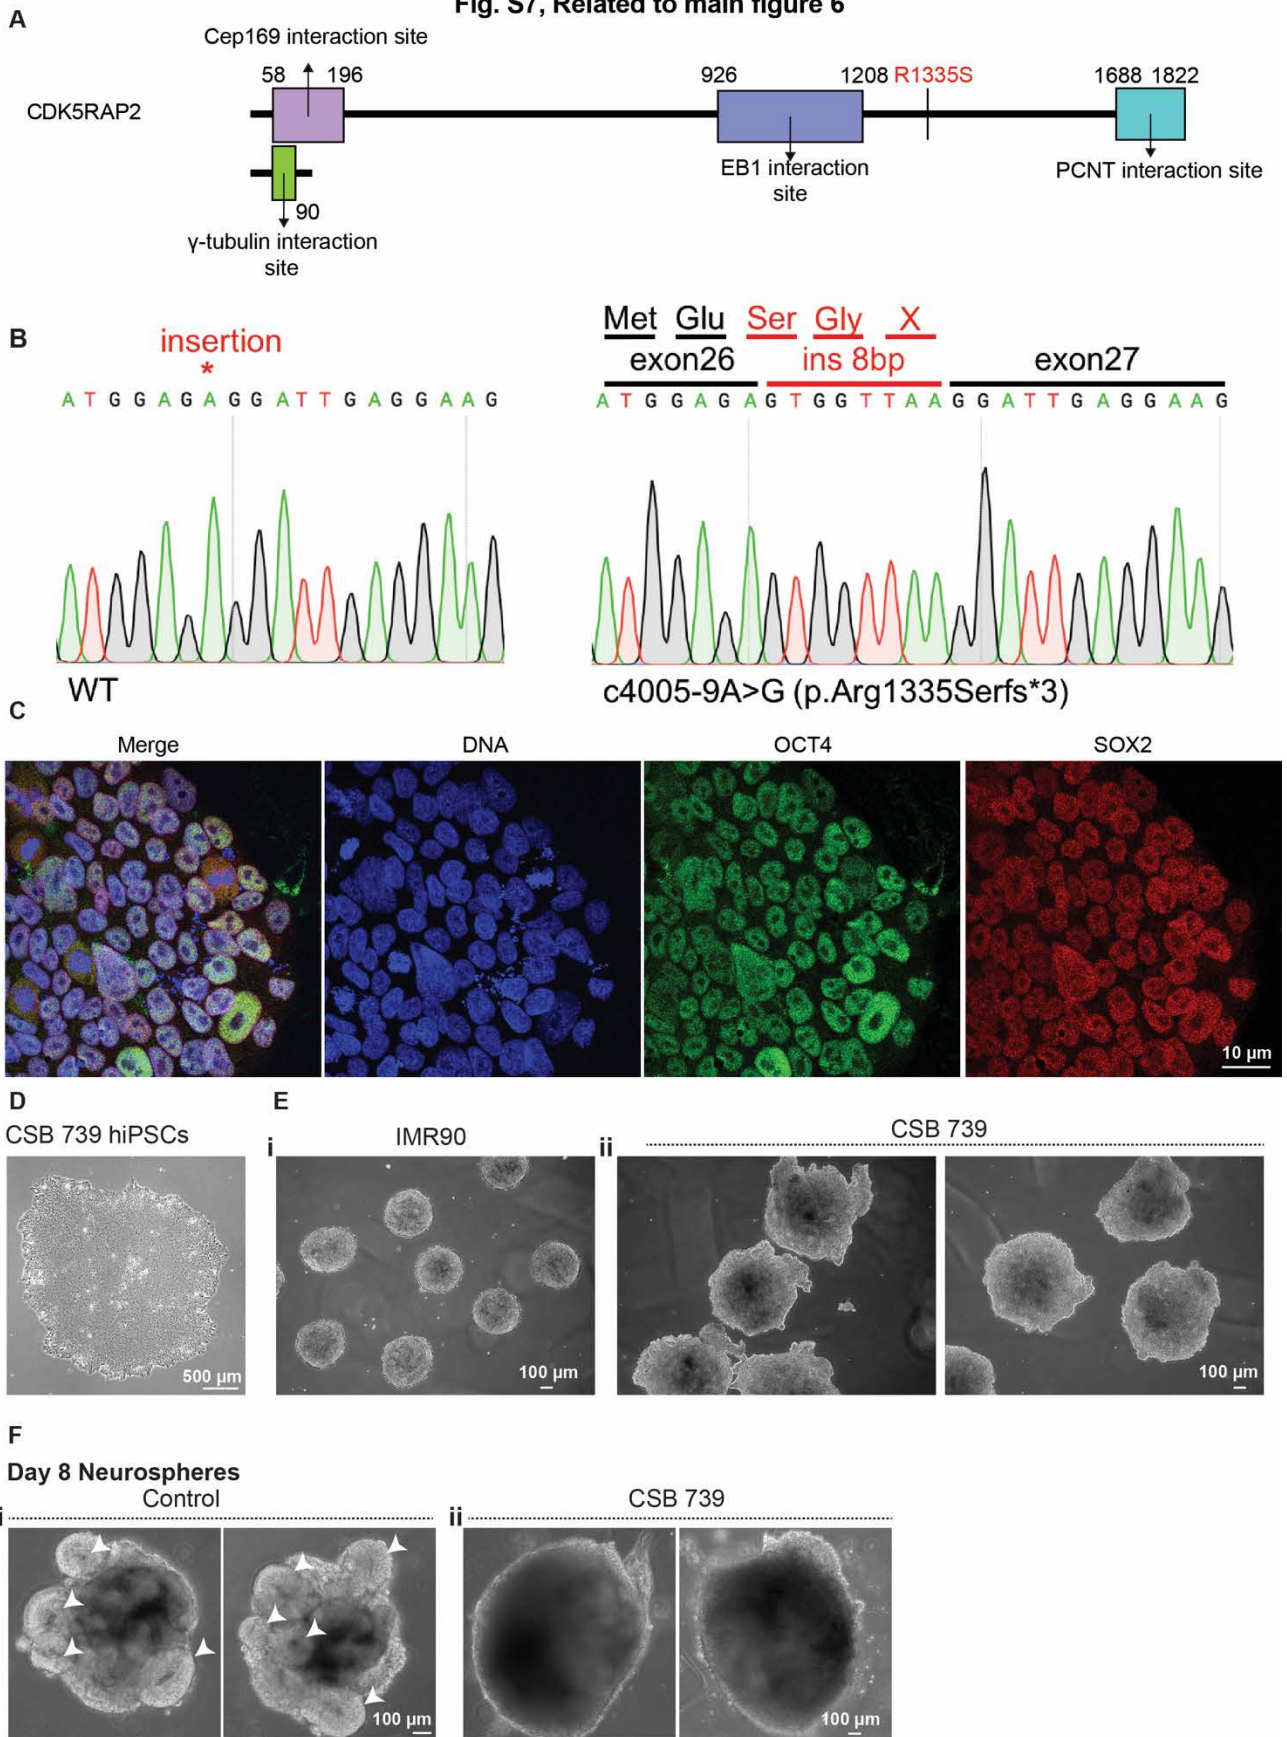

**Figure S7: Hi-Q brain organoids model microcephaly caused by a CDK5RAP2 mutation and brain organization defects caused by a CSB mutation (Related to Figure 6)**

**A.** Schematics of the CDK5RAP2 secondary structure showing protein interaction sites and the frameshift mutation R1335S.



**B.** DNA sequence of mutant CDK5RAP2 from patient-derived hiPSC (right) compared to healthy control (left). Nucleotide insertions between exon 26 and 27 are highlighted (red), leading to a frameshift with an amino acid change from R to S.

**C.** Patient-derived hiPSC displaying pluripotent markers of OCT4 and SOX2.

**D-F.** Comparison of neurospheres derived from healthy control (IMR90) and Cockayne Syndrome (CSB 739; due to a mutation in CSB). Bright field images. Arrowheads in panel F point to well-defined neurospheres in healthy controls. Such structures are not observed in CSB739. Panels show the scale bar.

**Fig. S8 GBM screening, second part 1**

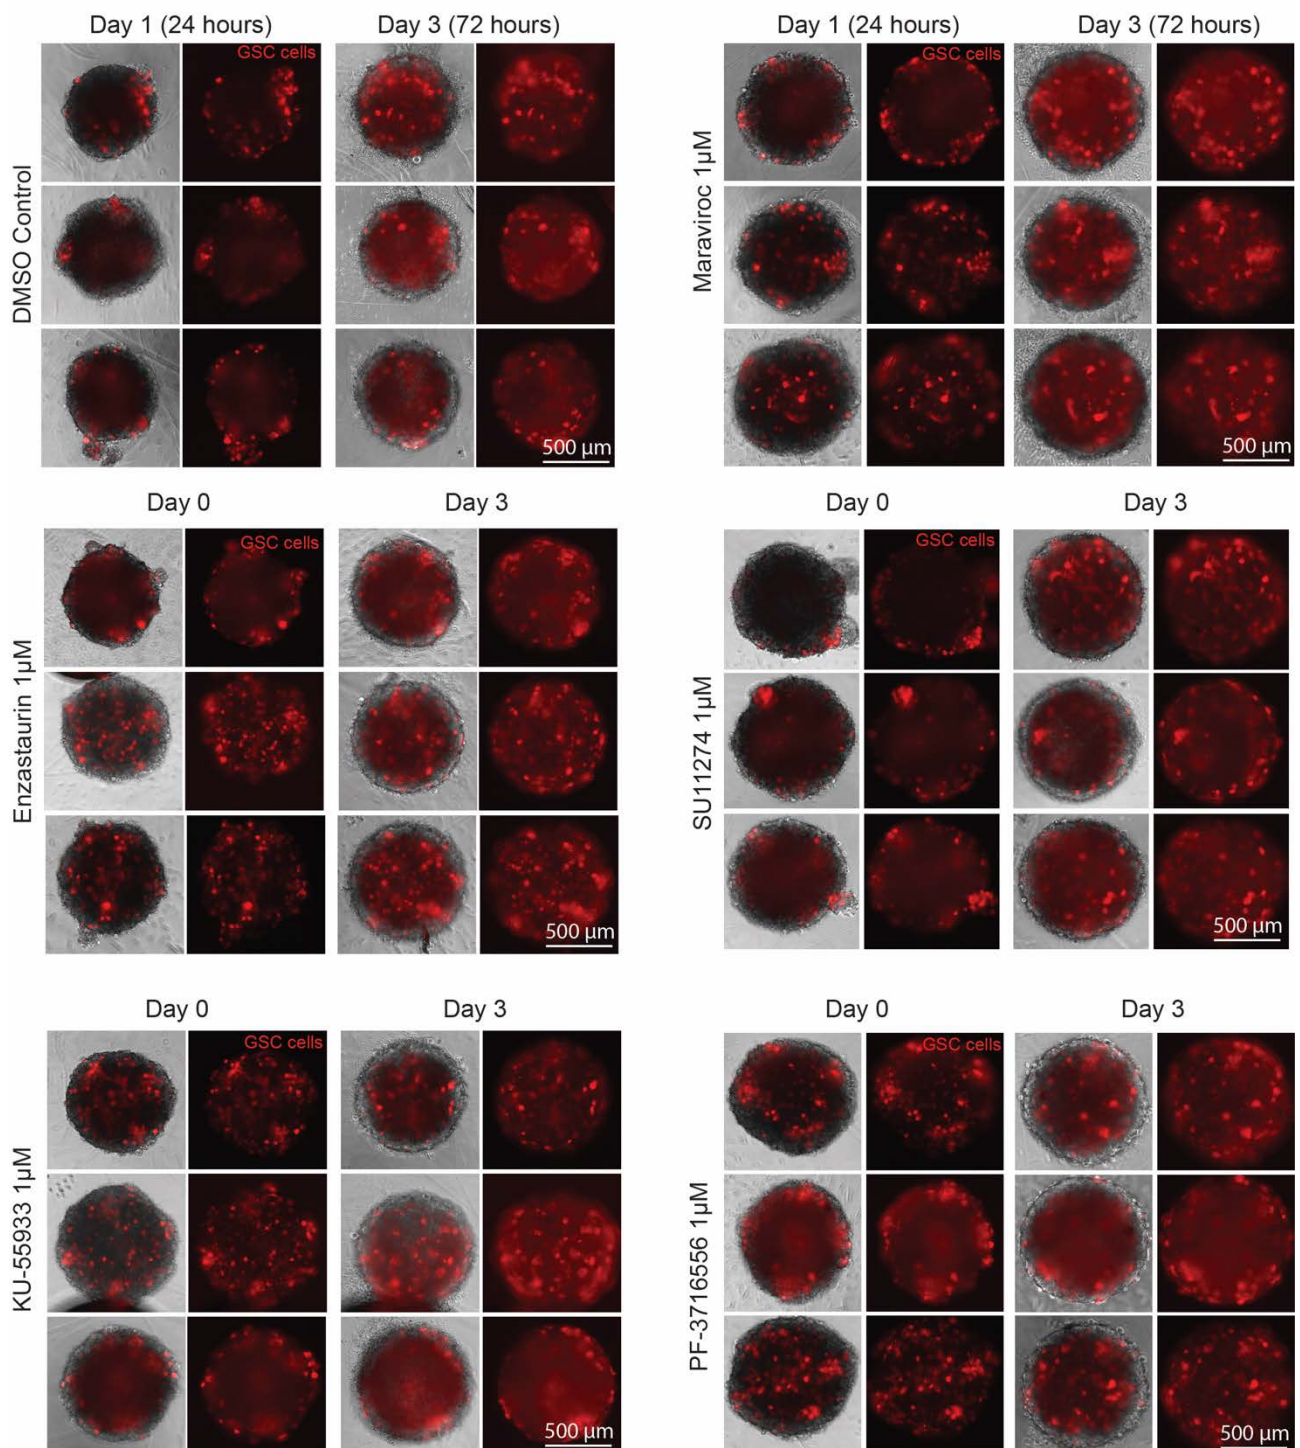

**Figure S8 (Parts 1 and 2): Secondary screening of compounds that perturb GSC invasion in Hi-Q brain organoids.**

**Fig. S8 GBM screening, second part 2**

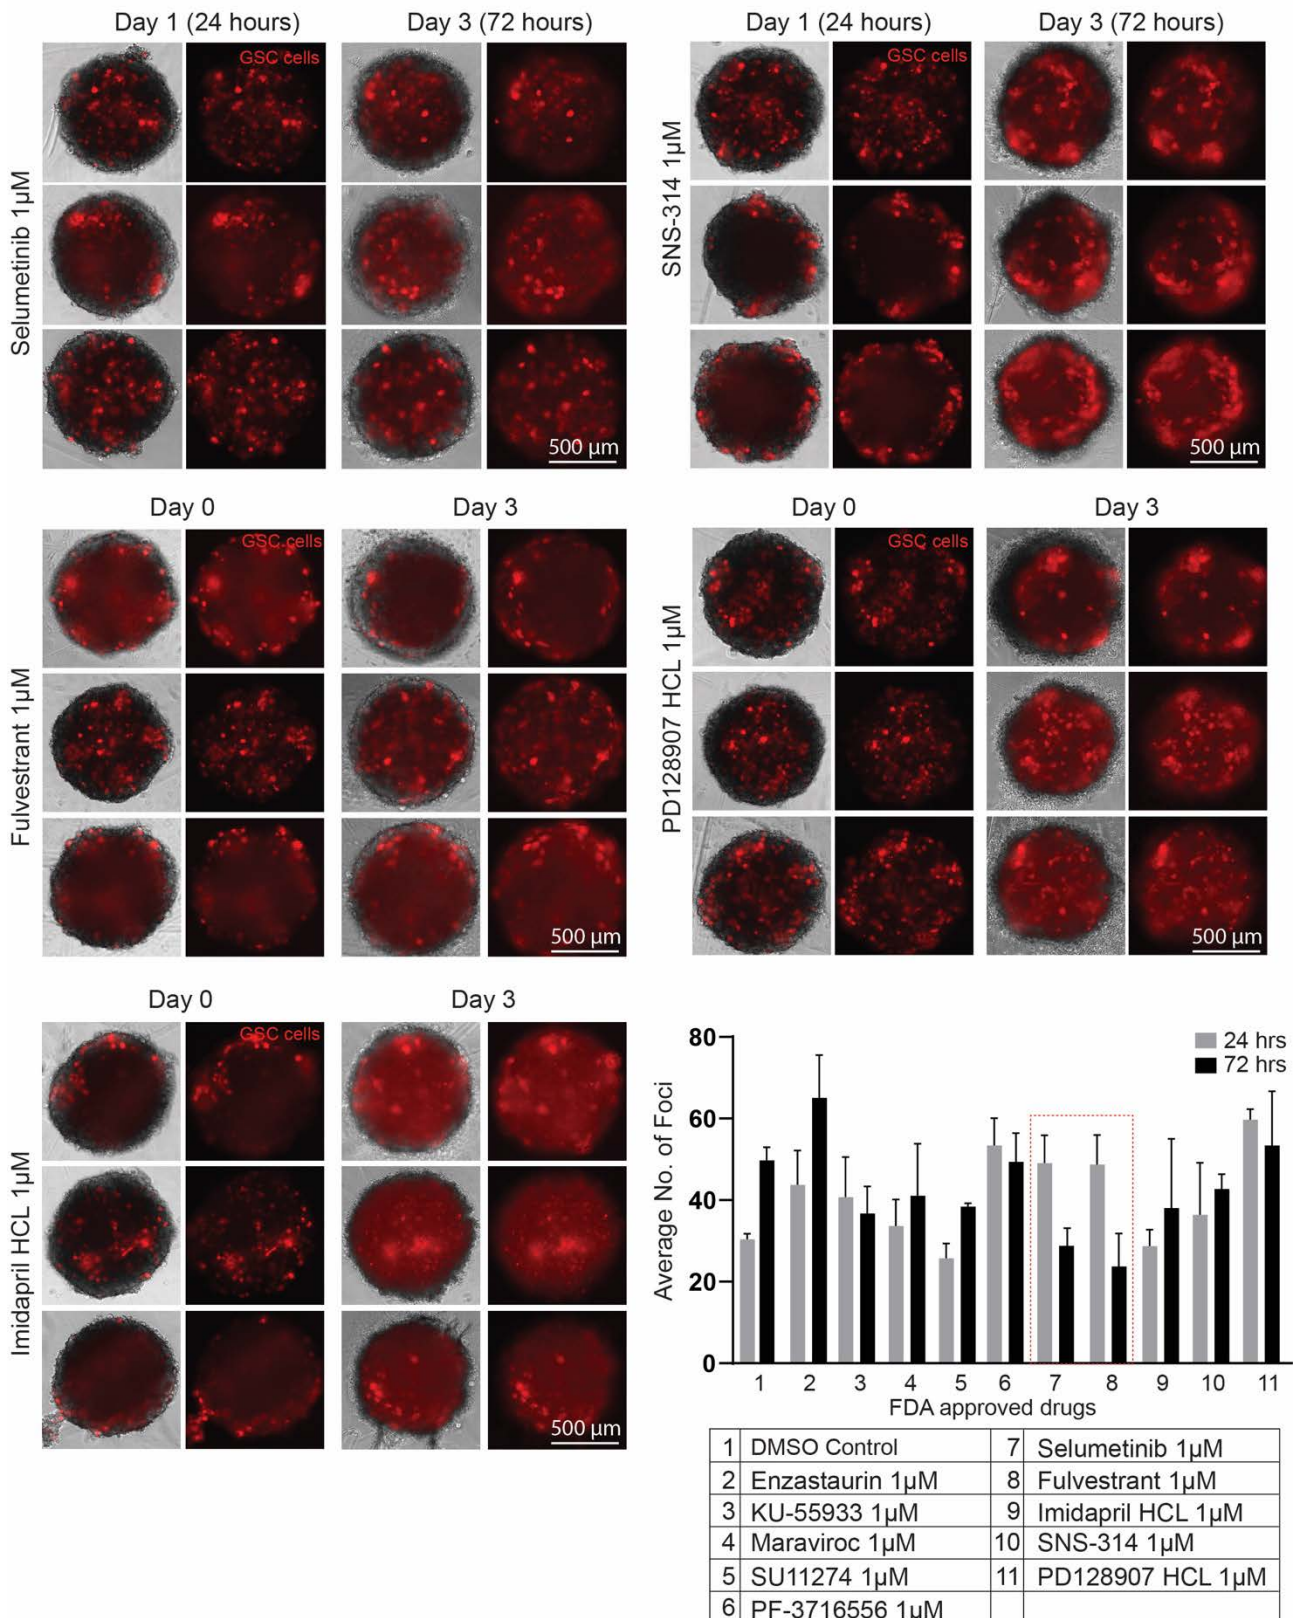

Testing of ten compounds (listed in the table at the end of the second part of the figure) for their ability to impair GSCs invasions in day 50 Hi-Q brain organoids. Patient-derived GSCs are labeled with mCherry. All experimental point includes three independent invasion assays with 1 µM of the selected compound. Invasions were measured at two different time points (24 and 72 hours). Note that the time point day 1 (or 24 hours) is 24 hours after seeding GSCs to brain organoids. The GSCs foci were calculated by automated imaging. The bar graph at the bottom quantifies the GSCs foci at 24 and 72 hours. The secondary screen identifies compounds 7 and 8 (Selumetinib and Fulvestrant) inhibiting GSC invasion (The dotted red box).



**Fig. S9 GBM screening, cell suspension**

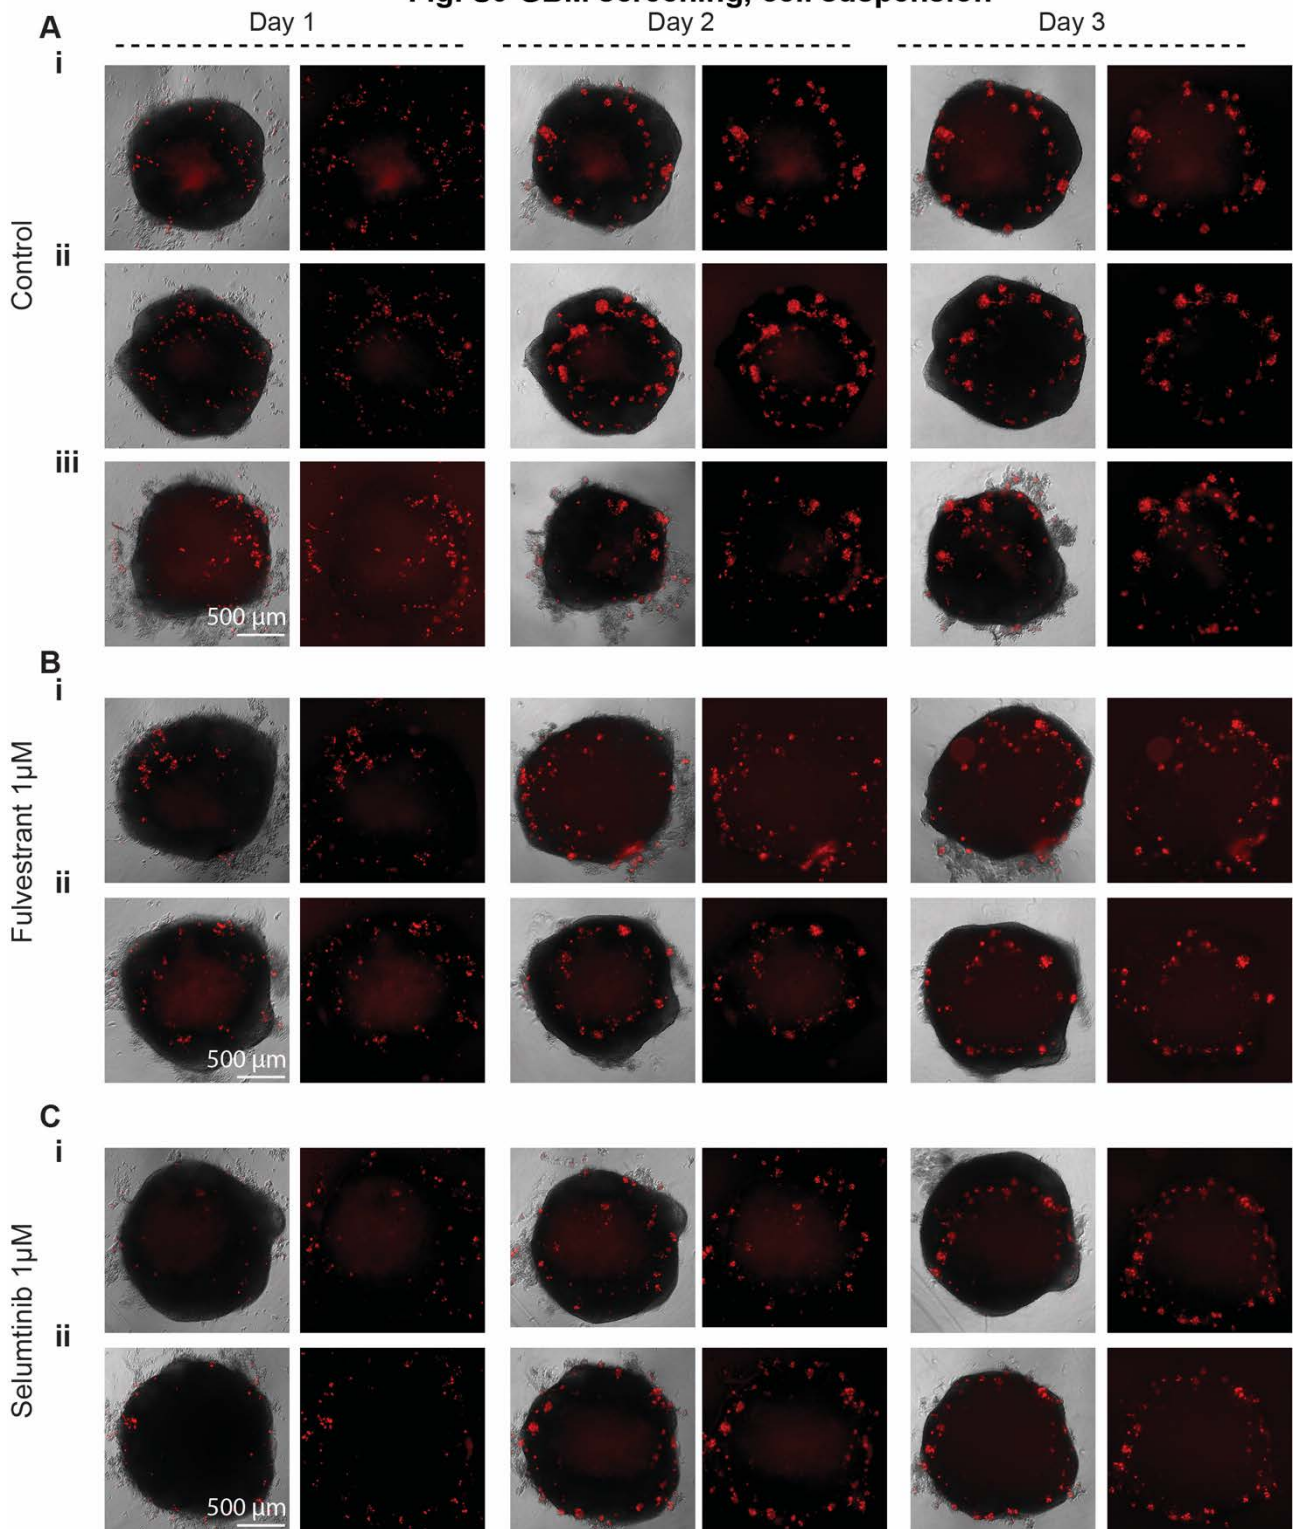

**Figure S9: Testing Selumetinib and Fulvestrant for their ability to perturb GSCs invasions in Hi-Q brain organoids (as cell suspension at low resolution)**

**A.** Kinetics of GSCs (red) invasions at day 0, day 1, and 2. Experiments were conducted in triplicate (i-iii). Panels show scale bars.

**B-C.** Exposure to 1μM Selumetinib (i-ii) and Fulvestrant (i-ii) appears to prevent GSC invasions into the organoids. Compared to untreated controls, drug-treated organoids show GSCs at the periphery of organoids. At least two representative organoid images are given. Panels show scale bar.

**Fig. S10 GBM screening, spheres**

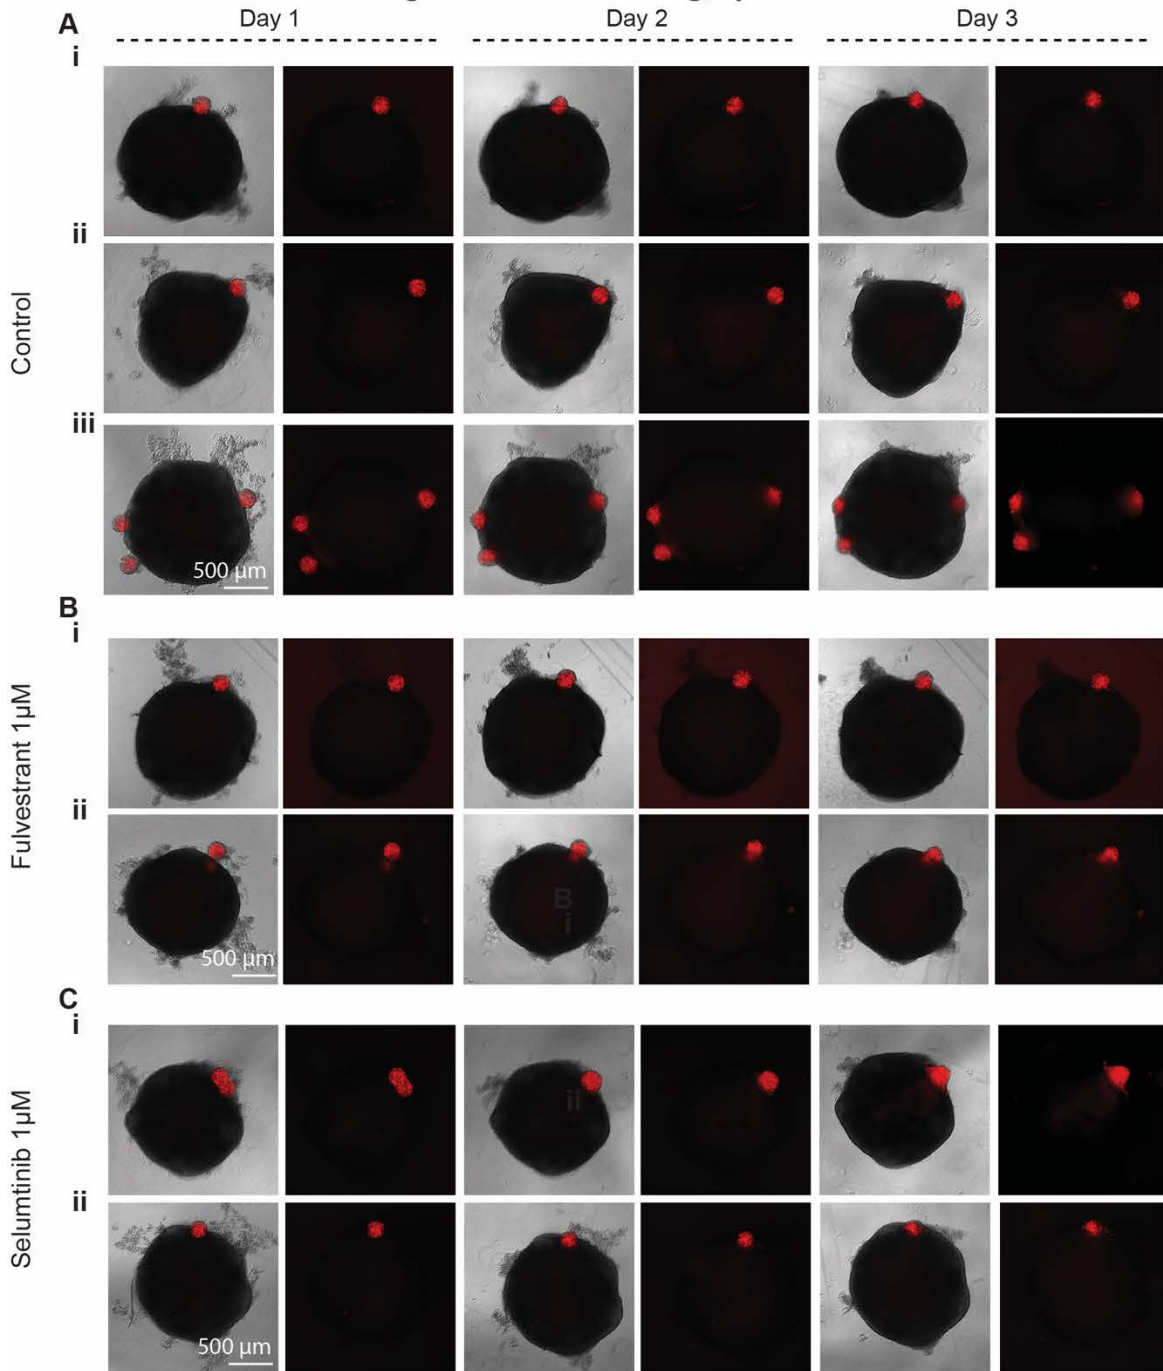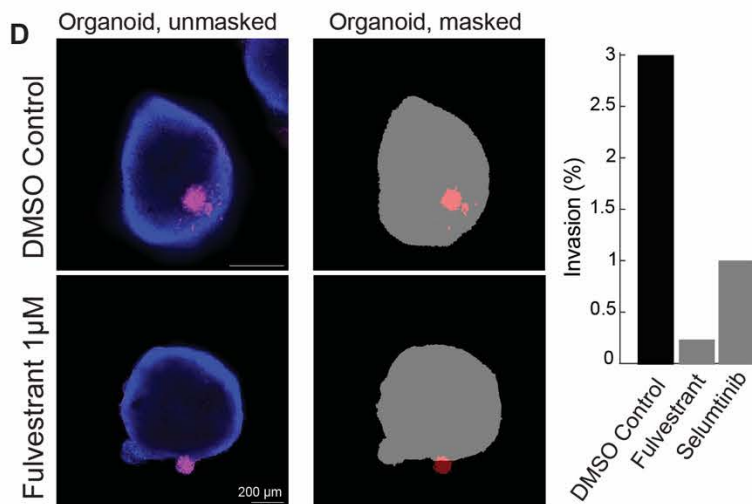

**Figure S10: Testing Selumetinib and Fulvestrant for their ability to perturb GSCs invasions in Hi-Q brain organoids (as spheres at low resolution)**

**A.** Kinetics of GSCs spheres (red) invasions on day 0, day 1, and 2. Experiments were conducted in triplicate (**i-iii**). GSC spheres integrate into organoids. Panels show scale bars.

**B-C.** Exposure to 1 $\mu$ M Selumetinib (**i-ii**) and Fulvestrant (**i-ii**) appears to prevent GSC spheres integration to organoids. Compared to untreated controls, drug-treated GSC spheres mainly stay at the edges of organoids. At least two representative organoid images are given. Panels show scale bar.

**D.** Computing the fraction of the organoid volume occupied by GSC spheres. A bar plot on the right shows the calculated percentage volume of organoids invaded by GSC spheres. Blue: Organoid. Magenta: GSC spheres.

**GSC line: #1**

**Figure S11**

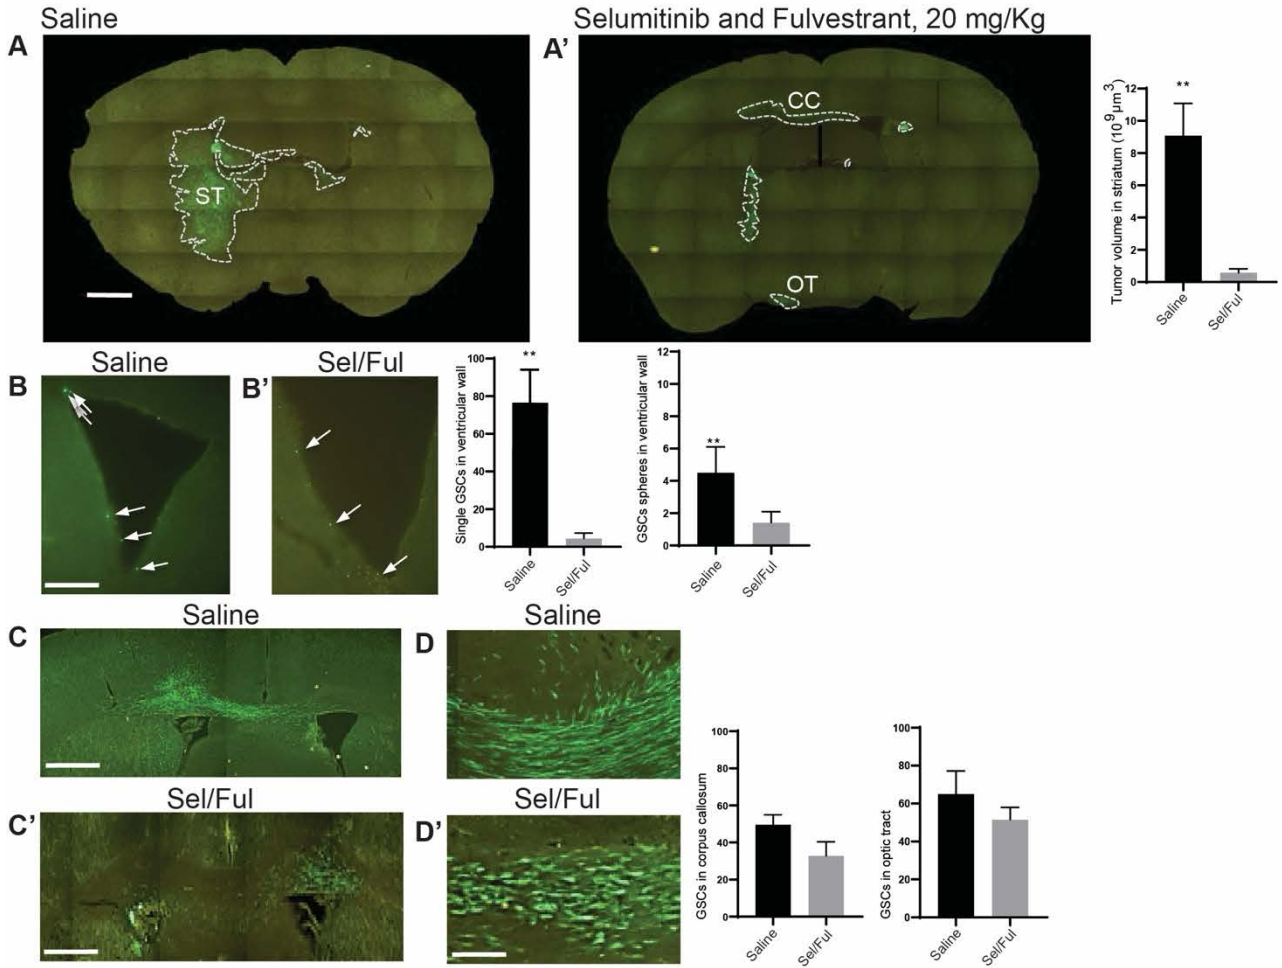

**GSC line: #472**

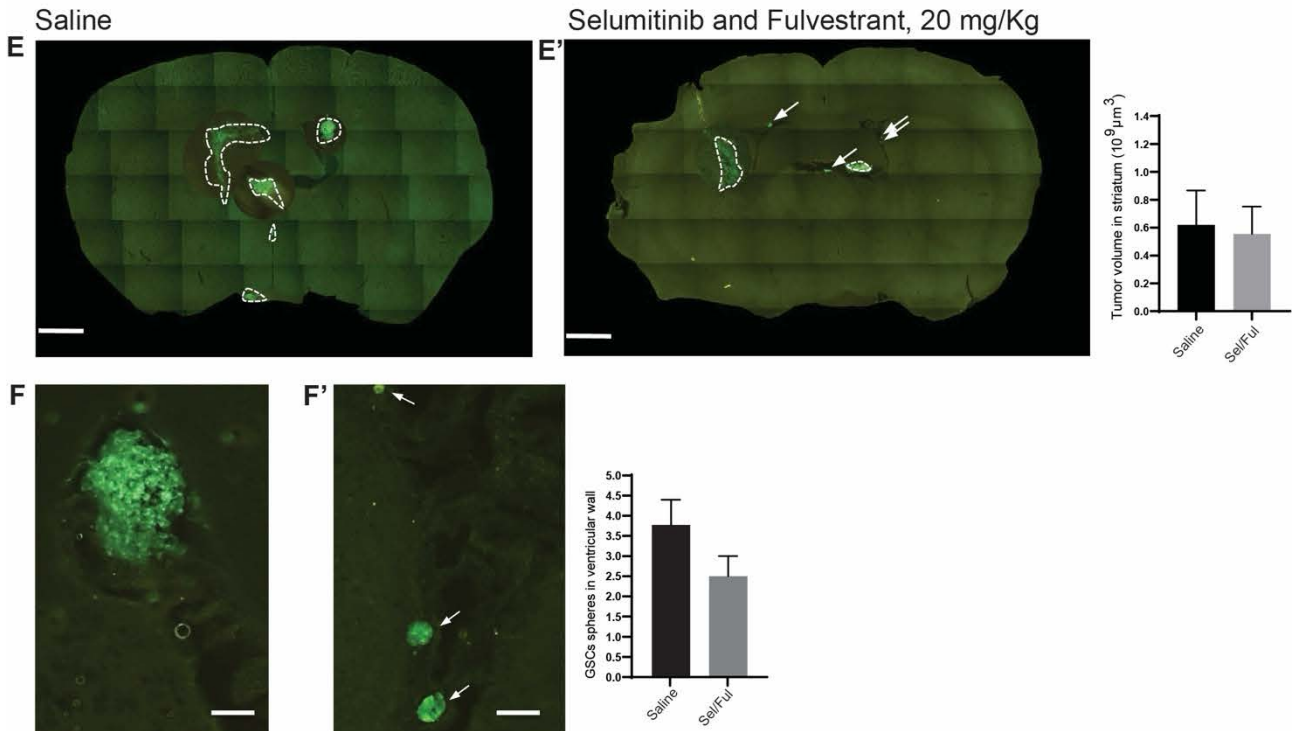

**Figure S11: Combined treatment of Selumetinib and Fulvestrant perturb GSC (GSC line #1 and GSC line #472) invasion in mouse xenografts.**

**A-A'**. In contrast to saline treatment, 20 mg/Kg treatment of Selumetinib and Fulvestrant (**A', right**) prevents integration of grafted GSC into the corpus callosum (CC) and optic tract (OT). Drug treatment reduces the tumor volume in the striatum. The bar diagram at right quantifies the tumor volume. Unpaired t-test and Mann-Whitney U test were used.

**B-B'**. Compared to saline treatment (**B**), Selumetinib and Fulvestrant (**B', right**) prevent integration of grafted GSC into the ventricular wall. The bar diagram at right quantifies the integrated GSCs. Unpaired t-test and Mann-Whitney U test were used.

**C-C'**. In contrast to saline treatment (**C**), Selumetinib and Fulvestrant (**C', bottom**) prevent grafted GSC integration into the corpus callosum ventricular wall. The bar diagram at right quantifies the integrated GSCs.

**D-D'**. Selumetinib and Fulvestrant treatment (**D', bottom**) prevents grafted GSC integration into the optic tract. Panel **D** (top) shows saline control. The bar diagram at right quantifies the number of GSCs integration between control and treated groups.

**E-E'**. **Combined treatment of Selumetinib and Fulvestrant perturb GSC (GSC line #472) invasion in mouse xenografts.** Selumetinib and Fulvestrant-treated animals (**E', right**) show a reduced tumor volume in the striatum. The saline-treated group is labeled as **E**. The bar diagram at right quantifies the tumor volume.

**F-F'**. Compared to saline treatment (**F**), Selumetinib and Fulvestrant (**F', right**) prevent the integration of grafted GSC spheres in the ventricular wall. The bar diagram on the right shows the quantification.



## Figure legend (Movie)

**Movie 1:** Bioreactor equipped with spinning arms to culture Hi-Q brain organoids. The movie shows suspending brain organoids.

**Movie 2 (Related to main figure 3):** Day 20 and day 60 Hi-Q brain organoids showing the distribution of various cell identity markers such as Acetylated  $\alpha$ -tubulin, PSD97, SOX2, DCX, Synapsin 1, Tau, MAP2, Actin, P-Vimentin, Nestin and PCP4. Z-series stacks were collected after whole-mount staining, tissue clearing, and confocal imaging. Scale bar 500  $\mu$ M.

**Movie 3 (Related to main figure 5): Control (never frozen) and thawed Hi-Q brain organoid** after cryopreservation showing the cytoarchitecture and distribution of dead cells labeled by TUNNEL. Z-series stacks were collected after whole-mount staining, tissue clearing, and confocal imaging. Scale bar 500  $\mu$ M.

**Supplementary Table 1. Media composition and incubation**

| Sr. No | Media Name                                  | Media Composition/ company)                                                                                                                                                                                                                                                                                                                                                                                                               | No. of Days in respective media |
|--------|---------------------------------------------|-------------------------------------------------------------------------------------------------------------------------------------------------------------------------------------------------------------------------------------------------------------------------------------------------------------------------------------------------------------------------------------------------------------------------------------------|---------------------------------|
| 1      | hiPSC maintenance medium                    | mTeSR-1 (Stem Cell Technologies)                                                                                                                                                                                                                                                                                                                                                                                                          | Variable (up to 80% confluency) |
| 2      | Neural Induction medium                     | STEM Diff Neural induction medium (NIM) (Stem cell technologies, Catalog # 05835)                                                                                                                                                                                                                                                                                                                                                         | 5                               |
| 3      | Wash media                                  | DMEM/ F12                                                                                                                                                                                                                                                                                                                                                                                                                                 | -                               |
| 4      | Neurosphere medium                          | 1:1 DMEM/F12 and Neural Basal medium, supplemented with N2 (1:200), B27 w/o Vitamin A (1:100) (Thermo-scientific) 0.05mM MEM non-essential amino acids (Gibco), L-glutamine (1:100, Gibco), Pen-strep (100 $\mu$ g/ml each), Insulin (0.2755 $\mu$ M, Sigma Aldrich), 0.05 mM $\beta$ -Mercaptoethanol (Life Technologies).                                                                                                               | 4                               |
| 5      | Human brain organoid differentiation medium | 1:1 DMEM/F12 and Neural Basal medium, supplemented with N2 (1:200), B27 w/o Vitamin A (1:100) (Thermo-scientific) 0.05mM MEM non-essential amino acids (Gibco), L-glutamine (1:100, Gibco), Pen-strep (100 $\mu$ g/ml each), Insulin (0.2755 $\mu$ M, Sigma Aldrich), 0.05 mM $\beta$ -Mercaptoethanol (Life Technologies), and supplemented with 5 $\mu$ M SB431542 (Selleckchem, USA) and 0.5 $\mu$ M Dorsomorphin (Sigma-Aldrich, USA) | 21                              |

|   |                                        |                                                                                                                                                                                                                                                                                                                                                                                                                                                                                              |           |
|---|----------------------------------------|----------------------------------------------------------------------------------------------------------------------------------------------------------------------------------------------------------------------------------------------------------------------------------------------------------------------------------------------------------------------------------------------------------------------------------------------------------------------------------------------|-----------|
| 6 | Human brain organoid maturation medium | 1:1 DMEM/F12 and Neural Basal medium, supplemented with N2 (1:200), B27 w/o Vitamin A (1:100) (Thermo-scientific) 0.05mM MEM non-essential amino acids (Gibco), L-glutamine (1:100, Gibco), Pen-strep (100 µg/ml each), Insulin (0.2755 µM, Sigma Aldrich), 0.05 mM β-Mercapto ethanol (Life Technologies)<br><br>Optional: Addition of neural differentiation or maturation factors such as retinoic acid, Brain derived neurotropic factor (BDNF), and Ciliary neurotrophic factor (CNTF). | ~ 150-180 |
|---|----------------------------------------|----------------------------------------------------------------------------------------------------------------------------------------------------------------------------------------------------------------------------------------------------------------------------------------------------------------------------------------------------------------------------------------------------------------------------------------------------------------------------------------------|-----------|

**Supplementary Table 2. Organoid batches**

| <b>Exp/<br/>Batch<br/>no.</b> | <b>Researcher<br/>no.</b> | <b>hiPSC cell type</b>                                  | <b>No. of<br/>neurospheres<br/>initiated<br/>(Approximate)</b> | <b>No. of<br/>organoids in<br/>spinner flasks<br/>(Approximate)</b> | <b>Status of<br/>experiment</b> | <b>Remarks</b>                                                                 | <b>Status of<br/>Freeze/thaw</b>   |
|-------------------------------|---------------------------|---------------------------------------------------------|----------------------------------------------------------------|---------------------------------------------------------------------|---------------------------------|--------------------------------------------------------------------------------|------------------------------------|
| 1                             | Researcher 1              | IMR90 (WiCell<br>Research Institute,<br>RRID:CVCL_C436) | 370                                                            | 350                                                                 | Successful                      | Neurospheres lost during<br>neural induction and<br>transfer to spinner flasks | Organoids were<br>not frozen       |
| 2                             | Researcher 1              | IMR90 (WiCell<br>Research Institute,<br>RRID:CVCL_C436) | 1080                                                           | 950                                                                 | Successful                      | Fused organoids were<br>discarded                                              | Organoids were<br>not frozen       |
| 3                             | Researcher 1              | IMR90 (WiCell<br>Research Institute,<br>RRID:CVCL_C436) | 370                                                            | 298                                                                 | Successful                      | -                                                                              | 20 organoids were<br>freeze-thawed |
| 4                             | Researcher 1              | IMR90 (WiCell<br>Research Institute,<br>RRID:CVCL_C436) | 740                                                            | 725                                                                 | Successful                      | Organoids disintegrated in<br>spinner flasks                                   | Organoids were<br>not frozen       |
| 5                             | Researcher 1              | IMR90 (WiCell<br>Research Institute,<br>RRID:CVCL_C436) | 555                                                            | 520                                                                 | Successful                      | Neurospheres lost during<br>neural induction                                   | Organoids were<br>not frozen       |
| 6                             | Researcher 1              | IMR90 (WiCell<br>Research Institute,<br>RRID:CVCL_C436) | 555                                                            | 530                                                                 | Successful                      | Fused organoids were<br>discarded from spinner<br>flasks                       | 20 organoids were<br>freeze-thawed |

|    |              |                                                        |     |     |            |                                                    |                           |
|----|--------------|--------------------------------------------------------|-----|-----|------------|----------------------------------------------------|---------------------------|
| 7  | Researcher 1 | IMR90 (WiCell Research Institute, RRID:CVCL_C436)      | 740 | 700 | Successful | Fused organoids were discarded from spinner flasks | Organoids were not frozen |
| 8  | Researcher 1 | Tubulin-GFP tagged hiPSCs (Coriell, Cat# AICS-0012)    | 370 | 345 | Successful | Neurospheres lost during neural induction          | Organoids were not frozen |
| 9  | Researcher 1 | Tubulin-GFP tagged hiPSCs (Coriell, Cat# AICS-0012)    | 185 | 180 | Successful | Fused organoids were discarded                     | Organoids were not frozen |
| 10 | Researcher 1 | Tubulin-RFP tagged hiPSCs (Coriell Cat# AICS-0031-035) | 370 | 360 | Successful | Fused organoids were discarded                     | Organoids were not frozen |
| 11 | Researcher 1 | Tubulin-RFP tagged hiPSCs (Coriell Cat# AICS-0031-035) | 185 | 175 | Successful | Neurospheres lost during transfer                  | Organoids were not frozen |
| 12 | Researcher 1 | Crx-ips (PMID: <a href="#">30100409</a> )              | 370 | 355 | Successful | Neurospheres lost during transfer                  | Organoids were not frozen |
| 13 | Researcher 1 | Crx-ips (PMID: <a href="#">30100409</a> )              | 185 | 145 | Successful | Organoids disintegrated (Reason unknown)           | Organoids were not frozen |
| 14 | Researcher 1 | Crx-ips (PMID: <a href="#">30100409</a> )              | 185 | 170 | Successful | Neurospheres lost during transfer                  | Organoids were not frozen |

|    |              |                                                        |     |     |            |                                                                    |                           |
|----|--------------|--------------------------------------------------------|-----|-----|------------|--------------------------------------------------------------------|---------------------------|
| 15 | Researcher 1 | CDK5RAP2 ipsc                                          | 185 | 180 | Successful | Neurospheres lost during transfer                                  | Organoids were not frozen |
| 16 | Researcher 1 | CDK5RAP2 ipsc                                          | 185 | 160 | Successful | Neurospheres lost during transfer / Fused organoids were discarded | Organoids were not frozen |
| 17 | Researcher 1 | CDK5RAP2 ipsc                                          | 185 | 180 | Successful | -                                                                  | Organoids were not frozen |
| 18 | Researcher 1 | CSB-GM739<br>(PMID: <a href="#">22904069</a> )         | 370 | 350 | Successful | Fused organoids were discarded                                     | Organoids were not frozen |
| 19 | Researcher 1 | CSB-GM739<br>(PMID: <a href="#">22904069</a> )         | 185 | 170 | Successful | Neurospheres lost during transfer                                  | Organoids were not frozen |
| 20 | Researcher 1 | CSB-GM739<br>(PMID: <a href="#">22904069</a> )         | 185 | 175 | Successful | Fused organoids were discarded                                     | Organoids were not frozen |
| 21 | Researcher 1 | CSB-GM739<br>(PMID: <a href="#">22904069</a> )         | 185 | 180 | Successful | Fused organoids were discarded                                     | Organoids were not frozen |
| 22 | Researcher 2 | Tubulin-GFP tagged hiPSCs<br>(Coriell, Cat# AICS-0012) | 370 | 325 | Successful | Neurospheres lost during neural induction                          | Organoids were not frozen |
| 23 | Researcher 2 | Tubulin-GFP tagged hiPSCs<br>(Coriell, Cat# AICS-0012) | 370 | 350 | Successful | Fused organoids were discarded                                     | Organoids were not frozen |
| 24 | Researcher 2 | Tubulin-RFP tagged hiPSCs                              | 370 | 350 | Successful | Neurospheres lost during neural induction                          | Organoids were not frozen |



|    |              |                                                              |     |     |                         |                                                                                   |                                 |
|----|--------------|--------------------------------------------------------------|-----|-----|-------------------------|-----------------------------------------------------------------------------------|---------------------------------|
|    |              | (Coriell Cat#<br>AICS-0031-035)                              |     |     |                         |                                                                                   |                                 |
| 26 | Researcher 2 | IMR90 (WiCell<br>Research Institute,<br>RRID:CVCL_C436)      | 370 | 100 | Partially<br>successful | Neurospheres lost during<br>neural induction and most<br>organoids were collapsed | Organoids were<br>not frozen    |
| 25 | Researcher 2 | IMR90 (WiCell<br>Research Institute,<br>RRID:CVCL_C436)      | 370 | 350 | Successful              | Fused organoids were<br>discarded                                                 | Organoids were<br>frozen        |
| 25 | Researcher 2 | Tubulin-GFP<br>tagged hiPSCs<br>(Coriell, Cat#<br>AICS-0012) | 720 | 700 | Successful              | Neurospheres lost during<br>neural induction                                      | Organoids were<br>not frozen    |
| 26 | Researcher 3 | IMR90 (WiCell<br>Research Institute,<br>RRID:CVCL_C436)      | 550 | 520 | Successful              | Neurospheres lost during<br>neural induction                                      | Organoids were<br>not frozen    |
| 27 | Researcher 3 | Tubulin-GFP<br>tagged hiPSCs<br>(Coriell, Cat#<br>AICS-0012) | 540 | 510 | Successful              | Fused organoids were<br>discarded from spinner<br>flasks                          | Organoids were<br>freeze-thawed |
| 28 | Researcher 3 | IMR90 (WiCell<br>Research Institute,<br>RRID:CVCL_C436)      | 720 | 700 | Successful              | Fused organoids were<br>discarded from spinner<br>flasks                          | Organoids were<br>not frozen    |
| 29 | Researcher 3 | Tubulin-GFP<br>tagged hiPSCs<br>(Coriell, Cat#<br>AICS-0012) | 370 | 350 | Successful              | Neurospheres lost during<br>neural induction                                      | Organoids were<br>not frozen    |

|    |              |                                                        |     |     |            |                                                 |                           |
|----|--------------|--------------------------------------------------------|-----|-----|------------|-------------------------------------------------|---------------------------|
| 30 | Researcher 3 | Tubulin-GFP tagged hiPSCs (Coriell, Cat# AICS-0012)    | 370 | 180 | Successful | Fused organoids were discarded                  | Organoids were not frozen |
| 31 | Researcher 3 | Tubulin-RFP tagged hiPSCs (Coriell Cat# AICS-0031-035) | 370 | 270 | Successful | Fused organoids were discarded                  | Organoids were not frozen |
| 32 | Researcher 4 | Tubulin-RFP tagged hiPSCs (Coriell Cat# AICS-0031-035) | 185 | 175 | Successful | Neurospheres lost during transfer               | Organoids were not frozen |
| 33 | Researcher 4 | IMR90 (WiCell Research Institute, RRID:CVCL_C436)      | 550 | 455 | Successful | Neurospheres lost during transfer               | Organoids were not frozen |
| 34 | Researcher 4 | IMR90 (WiCell Research Institute, RRID:CVCL_C436)      | 365 | 320 | Successful | Neurospheres lost during transfer               | Organoids were not frozen |
| 35 | Researcher 4 | IMR90 (WiCell Research Institute, RRID:CVCL_C436)      | 370 | 30  | Failed     | Organoids were collapsed due to unknown reasons | Organoids were not frozen |
| 36 | Researcher 5 | IMR90 (WiCell Research Institute, RRID:CVCL_C436)      | 370 | 360 | Successful | Neurospheres lost during transfer               | Organoids were not frozen |

|    |              |                                                     |     |     |            |                                   |                           |
|----|--------------|-----------------------------------------------------|-----|-----|------------|-----------------------------------|---------------------------|
| 37 | Researcher 5 | IMR90 (WiCell Research Institute, RRID:CVCL_C436)   | 370 | 350 | Successful | Neurospheres lost during transfer | Organoids were not frozen |
| 38 | Researcher 6 | Tubulin-GFP tagged hiPSCs (Coriell, Cat# AICS-0012) | 925 | 880 | Successful | Fused organoids were discarded    | Organoids were not frozen |
| 39 | Researcher 6 | IMR90 (WiCell Research Institute, RRID:CVCL_C436)   | 925 | 900 | Successful | -                                 | Organoids were frozen     |

Total number of neurospheres initiated: **17290**

Total number of organoids recovered to spinner flasks: **15373**

Recover/success rate: **88.9%**



|       |                                    |          |    |          |         |             |               |    |     |    |                                                                                                                         |                                                                                                                                                                                                                                                                                          |               |              |           |        |                                                                                                                                                                                                                           |       |    |   |    |
|-------|------------------------------------|----------|----|----------|---------|-------------|---------------|----|-----|----|-------------------------------------------------------------------------------------------------------------------------|------------------------------------------------------------------------------------------------------------------------------------------------------------------------------------------------------------------------------------------------------------------------------------------|---------------|--------------|-----------|--------|---------------------------------------------------------------------------------------------------------------------------------------------------------------------------------------------------------------------------|-------|----|---|----|
| S1033 | Nilotinib (AMN-107)                | 43879800 | c3 | L3500-01 | 529.52  | 641571-10-0 | Bcr-Abl       | 27 | 51  | <1 | <a href="http://sellectchem.com/products/Nilotinib.html">http://sellectchem.com/products/Nilotinib.html</a>             | <p>Nilotinib (AMN-107) is a selective Bcr-Abl inhibitor with IC50 less than 30 nM in Murine myeloid progenitor cells.</p>                                                                                                                                                                | Angiogenesis  | C28H22F3N7O  | free base | N/A    | <chem>CC1=CN(C=N1)C1=CC(=O)C2=CC=C(C)C(NC3=NC=CC(=N3)C3=CN=CC=C3)=C2=C(C=C1)C(F)(F)F</chem> <p>[c:4,22,24,29,31,33,35,37,t:1,7,13,1 5,20,27]</p>                                                                          | 5,084 | 5  | 2 | 7  |
| S1036 | PD0325901                          | 44194817 | d3 | L3500-01 | 482.19  | 391210-10-9 | MEK           | 96 | 199 | <1 | <a href="http://sellectchem.com/products/PD-0325901.html">http://sellectchem.com/products/PD-0325901.html</a>           | <p>PD0325901 is a selective and non ATP-competitive MEK inhibitor with IC50 of 0.33 nM in cell-free assays, roughly 500-fold more potent than CI-1040 on phosphorylation of ERK1 and ERK2.</p> <p>Phase 2.</p>                                                                           | MAPK          | C16H14F3N2O4 | free base | N/A    | <chem>OC1C@H(O)CONC(=O)C1=C(NC2=CC=C(C1)C(=C2)C(F)(F)F)C(F)(F)F</chem> <p>[r,c:9,17,25,t:12,14,22]</p>                                                                                                                    | 2,578 | 2  | 4 | 7  |
| S1041 | STF-62247                          | 43518340 | e3 | L3500-01 | 267.35  | 315702-99-9 | Autophagy     | 53 | 198 | <1 | <a href="http://sellectchem.com/products/STF-62247.html">http://sellectchem.com/products/STF-62247.html</a>             | <p>STF-62247 is a molecule targeting VHL-deficient renal cell carcinoma that induces autophagy. STF-62247 shows selective toxicity and growth inhibition of renal cells lacking VHL 25-fold greater sensitivity observed for cells with VHL deficiency compared to wild-type (VHL+).</p> | Autophagy     | C15H13N3S    | free base | N/A    | <chem>CC1=CC(NC2=NC(=CS2)C2=CC=N1)C(=O)C(F)(F)F</chem> <p>[r:7,13,16,17,t:1,5,11]</p>                                                                                                                                     | 3,659 | 2  | 1 | 3  |
| S1044 | Temsirolimus (CCI-779, NSC 683864) | 44075746 | f3 | L3500-01 | 1030.29 | 162635-04-3 | mTOR          | 67 | 65  | <1 | <a href="http://sellectchem.com/products/Temsirolimus.html">http://sellectchem.com/products/Temsirolimus.html</a>       | <p>Temsirolimus (CCI-779, NSC 683864) is a specific mTOR inhibitor with IC50 of 1.76 μM in a cell-free assay.</p>                                                                                                                                                                        | PI3K/Akt/mTOR | C56H87NO16   | free base | N/A    | <chem>CO[C@@H]1C[C@@H](C(C)[C@@H](C)C)C[C@@H]2CC(=O)C(C)[C@@H](C)C=C(C)C[C@@H](C)C[C@@H]1(C)C[C@@H](C)C[C@@H]3C)C[C@@H](C)C[C@@H](C)C(=O)N3CC(C)C[C@@H]3C(=O)O2)OC)C[C@@H](C)C(=O)C(C)CO)CO</chem> <p>[r:31,34,36,37]</p> | 6,039 | 12 | 3 | 11 |
| S1048 | Tozasertib (VX-680, MK-0457)       | 43883500 | g3 | L3500-01 | 464.59  | 639089-54-6 | Aurora Kinase | 93 | 200 | <1 | <a href="http://sellectchem.com/products/VX-680(MK-0457).html">http://sellectchem.com/products/VX-680(MK-0457).html</a> | <p>Tozasertib (VX-680, MK-0457) is a pan-Aurora inhibitor, mostly against Aurora A with Kiapp of 0.6 nM in a cell-free assay, less potent towards Aurora B/Aurora C and 100-fold more selective for Aurora A than 55 other kinases.</p> <p>Phase 2.</p>                                  | Cell Cycle    | C23H28N8O5S  | free base | N/A    | <chem>CN1CCN(CC1)C1=NC(=S)C2=CC(=O)NC(=O)C3CC3)C=C2)N=NC(NC2=N(C(=O)N(C)C)C3=CC=C3)C1</chem> <p>[t:8,12,14,29]</p>                                                                                                        | 4,445 | 4  | 3 | 7  |
| S1055 | Enzastaurin (LY317615)             | 44089519 | b4 | L3500-01 | 515.61  | 170364-57-5 | PKC           | 30 | 58  | <1 | <a href="http://sellectchem.com/products/Enzastaurin.html">http://sellectchem.com/products/Enzastaurin.html</a>         | <p>Enzastaurin (LY317615) is a potent PKCβ selective inhibitor with IC50 of 6 nM in cell-free assays, 6- to 20-fold selectivity against PKCα, PKCγ and PKCε.</p> <p>Phase 3.</p>                                                                                                         | TGF-beta/Smad | C32H29N5O5   | free base | N/A    | <chem>CN1C=C(C2=CC=CC=C2)C1=C(C(=O)NC1=O)C1=CN(C2CCN(C)C3=NC=CC(=O)C2=CC=CC1)C(F)(F)F</chem> <p>[r:30,35,40,t:4,8,12,26,35,42]</p>                                                                                        | 4,32  | 3  | 1 | 5  |
| S1065 | Pictilisib (GDC-0941)              | 44117299 | c4 | L3500-01 | 513.64  | 957054-30-7 | PI3K          | 44 | 86  | <1 | <a href="http://sellectchem.com/products/Pictilisib.html">http://sellectchem.com/products/Pictilisib.html</a>           | <p>Pictilisib (GDC-0941) is a potent inhibitor of PI3Kα/δ with IC50 of 3 nM in cell-free assays, with modest</p>                                                                                                                                                                         | PI3K/Akt/mT   | C23H27N7O    | free base | RG7321 | 2,153                                                                                                                                                                                                                     | 6     | 1  | 5 |    |



|       |                                  |          |    |          |        |              |                  |     |     |    |  |                                                                                                               |                                                                                                                                                                                                                                                                                           |                         |                |                 |                       |                                                                                                |       |   |   |   |
|-------|----------------------------------|----------|----|----------|--------|--------------|------------------|-----|-----|----|--|---------------------------------------------------------------------------------------------------------------|-------------------------------------------------------------------------------------------------------------------------------------------------------------------------------------------------------------------------------------------------------------------------------------------|-------------------------|----------------|-----------------|-----------------------|------------------------------------------------------------------------------------------------|-------|---|---|---|
|       |                                  |          |    |          |        |              |                  |     |     |    |  | <a href="http://selleckchem.com/products/GDC-0941.html">http://selleckchem.com/products/GDC-0941.html</a>     | selectivity against p110 $\beta$ (11-fold) and p110 $\gamma$ (25-fold). Phase 2.                                                                                                                                                                                                          | OR                      | 3S2            |                 |                       | CS(=O)(=O)N1CCN(C2=C3C=NC(=NC14CCOCC4)=C3S2)C2=CC=C(C=C2)C2=NC1CC1                             |       |   |   |   |
| S1067 | SB431542                         | 43525502 | d4 | L3500-01 | 384.39 | 301836-41-9  | TGF-beta/Smad    | 76  | 198 | <1 |  | <a href="http://selleckchem.com/products/SB-431542.html">http://selleckchem.com/products/SB-431542.html</a>   | SB431542 is a potent and selective inhibitor of ALK5 with IC50 of 94 nM in a cell-free assay, 100- fold more selective for ALK5 than p38 MAPK and other kinases.                                                                                                                          | TGF-beta/Smad           | C22H16N4O3     | free base       | N/A                   | NC(=O)C1=CC=C(C=C1)C1=NC(=C(N1)C1=NC=CC=C1)C1=CC2=C(C(=O)C2)C=C1                               | 3,447 | 5 | 2 | 4 |
| S1069 | Luminespib (AUY-922, NVP-AUY922) | 44064612 | e4 | L3500-01 | 465.54 | 747412-49-3  | HSP (e.g. HSP90) | 93  | 200 | <1 |  | <a href="http://selleckchem.com/products/NVP-AUY922.html">http://selleckchem.com/products/NVP-AUY922.html</a> | Luminespib (AUY-922, NVP-AUY922) is a highly potent HSP90 inhibitor for HSP90 $\alpha/\beta$ with IC50 of 13 nM /21 nM in cell- free assays, weaker potency against the HSP90 family members GRP94 and TRAP-1, exhibits the tightest binding of any small-molecule HSP90 ligand. Phase 2. | Cytoskeletal Signaling  | C26H31N3O5     | free base       | VER-52296             | CCNC(=O)C1=NOC(=C1)C1=CC=C(CN2CCOCC2)C=C1)C1=CC(C(C)C)C(=O)C1                                  | 4,069 | 4 | 3 | 7 |
| S1070 | PHA-665752                       | 43915671 | f4 | L3500-01 | 641.61 | 477575-56-7  | c-Met            | 128 | 199 | <1 |  | <a href="http://selleckchem.com/products/PHA-665752.html">http://selleckchem.com/products/PHA-665752.html</a> | PHA-665752 is a potent, selective and ATP-competitive c-Met inhibitor with IC50 of 9 nM in cell-free assays, >50-fold selectivity for c-Met than RTKs or STKs.                                                                                                                            | Protein Tyrosine Kinase | C32H34Cl2N4O4S | free base       | N/A                   | CC1=C(C(=O)N2CCC(C@@H)2CN2CCOCC2)C(C)=C(N1)C=C1)C(=O)NC2=C1C=C(C=C2)S(=O)(=O)CC1=C(C)C=CC=C1C1 | 5,689 | 4 | 2 | 7 |
| S1071 | HA14-1                           | 43446833 | g4 | L3500-01 | 409.23 | 65673-63-4   | Bcl-2            | 82  | 200 | <1 |  | <a href="http://selleckchem.com/products/HA14-1.html">http://selleckchem.com/products/HA14-1.html</a>         | HA14-1 is a non-peptidic ligand of a Bcl-2 surface pocket with IC50 of ~9 $\mu$ M.                                                                                                                                                                                                        | Apoptosis               | C17H17BrN2O5   | free base       | N/A                   | [H]C@@1([C@H](C#N)C(=O)OCC(C2=CC(Br)=CC=C2OC(N)=C1C(=O)OCC1r.c:13,15,20,t:10]                  | 2,511 | 5 | 1 | 7 |
| S1078 | MK-2206 2HCl                     | 44116475 | b5 | L3500-01 | 480.39 | 1032350-13-2 | Akt              | 14  | 29  | <1 |  | <a href="http://selleckchem.com/products/MK-2206.html">http://selleckchem.com/products/MK-2206.html</a>       | MK-2206 2HCl is a highly selective inhibitor of Akt1/2/3 with IC50 of 8 nM/12 nM/65 nM in cell- free assays, respectively no inhibitory activities against 250 other protein kinases observed. Phase 2.                                                                                   | PI3K/Akt/mTOR           | C25H23Cl2N5O   | Dihydrochloride | N/A                   | Cl.C1.NC1(CCC1)C1=CC=C(C=C1)C1=C(C=C2C3=NNC(=O)N3C=CC2)C(=O)C1                                 | 4,183 | 3 | 2 | 3 |
| S1080 | SU11274                          | 43903025 | c5 | L3500-01 | 568.09 | 658084-23-2  | c-Met            | 92  | 162 | <1 |  | <a href="http://selleckchem.com/products/SU11274.html">http://selleckchem.com/products/SU11274.html</a>       | SU11274 is a selective Met inhibitor with IC50 of 10 nM in cell-free assays, no effects on PGDFR $\beta$ , EGFR or Tie2.                                                                                                                                                                  | Protein Tyrosine Kinase | C28H30ClN5O4S  | free base       | PKI-SU11274           | CN(C1=CC(C)=CC=C1)S(=O)(=O)C1=CC2=C(NC(=O)C2=C(C(=O)N3CCN(C)CC3)C(C)N2)C                       | 3,477 | 4 | 2 | 5 |
| S1085 | Belinostat (PXD101)              | 43953686 | d5 | L3500-01 | 318.35 | 414864-00-9  | HDAC             | 64  | 201 | <1 |  | <a href="http://selleckchem.com/products/Belinostat.html">http://selleckchem.com/products/Belinostat.html</a> | Belinostat (PXD101) is a novel HDAC inhibitor with IC50 of 27 nM in a cell-free assay, with activity demonstrated in cisplatin-resistant tumors.                                                                                                                                          | Epigenetics             | C15H14N2O4S    | free base       | NSC726630, PX-105684  | ONC(=O)C=C1C1=CC(=CC=C1)S(=O)(=O)NC1=CC=CC=C1                                                  | 1.8   | 3 | 2 | 5 |
| S1087 | Iniparib (BSI-201)               | 44076148 | e5 | L3500-01 | 292.03 | 160003-66-7  | PARP             | 58  | 199 | <1 |  | <a href="http://selleckchem.com/products/BSI-201.html">http://selleckchem.com/products/BSI-201.html</a>       | Iniparib (BSI-201) is a PARP1 inhibitor with demonstrated effectiveness in triple- negative breast cancer (TNBC). Phase 3.                                                                                                                                                                | DNA Damage              | C7H5IN2O3      | free base       | NSC-746045, IND-71677 | NC(=O)C1=CC(=C(C)C=C                                                                           | 1,304 | 1 | 1 | 2 |

|       |                                    |          |    |          |        |              |                |     |     |    |                                                  |                                                                                                                                                                                                                     |                         |               |           |            |                                                                                                                     |                                                      |       |   |   |    |
|-------|------------------------------------|----------|----|----------|--------|--------------|----------------|-----|-----|----|--------------------------------------------------|---------------------------------------------------------------------------------------------------------------------------------------------------------------------------------------------------------------------|-------------------------|---------------|-----------|------------|---------------------------------------------------------------------------------------------------------------------|------------------------------------------------------|-------|---|---|----|
| S1089 | Refametinib (RDEA119, Bay 86-9766) | 44117407 | f5 | L3500-01 | 572,34 | 923032-37-5  | MEK            | 100 | 175 | <1 | chem.com/products/BSI-201.html                   | Refametinib (RDEA119, Bay 86-9766) is a potent, ATP non-competitive and highly selective inhibitor of MEK1 and MEK2 with IC50 of 19 nM and 47 nM, respectively.                                                     | MAPK                    | C19H20F3N2O5S | free base | BAY 869766 | COC1=C(NS(=O)=O)C2(C)C@H(O)C(C2)C(NC2=CC=C1)C=C2F                                                                   | r.c:2,24,31,19,21,27                                 | 2,827 | 3 | 4 | 9  |
| S1091 | Linsitinib (OSI-906)               | 44164514 | g5 | L3500-01 | 421,49 | 867160-71-2  | IGF-1R         | 84  | 199 | <1 | http://selleckchem.com/products/OSI-906.html     | Linsitinib (OSI-906) is a selective inhibitor of IGF- 1R with IC50 of 35 nM in cell-free assays modestly potent to InsR with IC50 of 75 nM, and no activity towards Abl, ALK, BTK, EGFR, FGFR1/2, PKA etc. Phase 3. | Protein Tyrosine Kinase | C26H23N5O3    | free base | N/A        | C[C@@]1(O)C[C@H](C1)C1=NC(=C2N1C=CN=C2N)C1=CC=C2=CC(=NC2=C1)C1=CC=C1C=C1                                            | r.c:9,13,15,23,25,28,33,35,47,19,21                  | 3,757 | 3 | 1 | 3  |
| S1092 | KU-55933 (ATM Kinase Inhibitor)    | 44083279 | b6 | L3500-01 | 395,49 | 587871-26-9  | ATM/ATR        | 33  | 83  | <1 | http://selleckchem.com/products/KU-55933.html    | KU-55933 (ATM Kinase Inhibitor) is a potent and specific ATM inhibitor with IC50/Ki of 12.9 nM/2.2 nM in cell-free assays, and is highly selective for ATM as compared to DNA-PK, PI3K/PI4K, ATR and mTOR.          | DNA Damage              | C21H17NO3S2   | free base | N/A        | O=C1C=C(C(OC(=C1)C1=CC=CC2=C1SC1=CC=CC=C1S2)N1CCC(C1)C2,5,10,12,18,20,t,6,16]                                       | 4,393                                                | 3     | 0 | 2 |    |
| S1093 | GSK1904529A                        | 42372696 | c6 | L3500-01 | 851,96 | 1089283-49-7 | IGF-1R         | 124 | 146 | <1 | http://selleckchem.com/products/GSK1904529A.html | GSK1904529A is a selective inhibitor of IGF- 1R and IR with IC50 of 27 nM and 25 nM in cell- free assays, >100-fold more selective for IGF- 1R/InsR than Akt1/2, Aurora A/B, B-Raf, CDK2, EGFR etc.                 | Protein Tyrosine Kinase | C44H47F2N9O5S | free base | GSK 4529   | CCC1=CC(NC2=NC(=CC=N2)C2=C(N=C3C=CC=CN23)C2=CC(C=O)N(C3=C(F)C=CC=C3F)=C(OC)C=C2)=C(OC)C=C1N1CCC(C1)N1CCN(CC1)S(C)=O | r.c:8,10,17,19,30,33,35,42,48,t:2,6,1 3,15,24,38,44] | 6,571 | 8 | 2 | 12 |
| S1094 | PF-04217903                        | 43522775 | d6 | L3500-01 | 372,38 | 956905-27-4  | c-Met          | 5   | 13  | <1 | http://selleckchem.com/products/PF-04217903.html | PF-04217903 is a selective ATP- competitive c-Met inhibitor with IC50 of 4.8 nM in A549 cell line, susceptible to oncogenic mutations (no activity to Y1230C mutant). Phase 1.                                      | Protein Tyrosine Kinase | C19H16N8O     | free base | N/A        | OCCN1C=C(C(=N1)C1=NC2=C(N=NN2CC2=CC3=CC=CN=C3C=C2)N                                                                 | r.c:16,13,22,24,27,30,t:9,14,18,20]                  | 1,561 | 6 | 1 | 5  |
| S1097 | BTZ043 Racemate                    | 43732124 | e6 | L3500-01 | 431,39 | 957217-65-1  | Anti-infection | 22  | 51  | <1 | http://selleckchem.com/products/BTZ043.html      | BTZ043 racemate is a decaprenylphosphoryl-β- D-ribose 2'-epimerase (DprE1) inhibitor acting as a new antimycobacterial agent that kill Mycobacterium tuberculosis.                                                  | Microbiology            | C17H16F3N3O5S | free base | N/A        | CC1COC2(CCN(CC2)C2=NC(=O)C3=CC(=CC1(N+)([O-])=O)=C3S2)C(F)(F)F)O1                                                   | r.c:17,22,31,11,13]                                  | 3,515 | 4 | 0 | 3  |

|       |                        |          |    |          |        |             |                          |     |     |    |                                                                                                                                     |                                                                                                                                                                                                                                                             |               |                |           |     |                                                                                                                        |       |   |   |    |
|-------|------------------------|----------|----|----------|--------|-------------|--------------------------|-----|-----|----|-------------------------------------------------------------------------------------------------------------------------------------|-------------------------------------------------------------------------------------------------------------------------------------------------------------------------------------------------------------------------------------------------------------|---------------|----------------|-----------|-----|------------------------------------------------------------------------------------------------------------------------|-------|---|---|----|
| S1100 | MLN8054                | 44075910 | f6 | L3500-01 | 476,86 | 869363-13-3 | Aurora Kinase            | 95  | 199 | <1 | <a href="http://selleckchem.com/products/MLN8054.html">http://selleckchem.com/products/MLN8054.html</a>                             | MLN8054 is a potent and selective inhibitor of Aurora A with IC50 of 4 nM in Sf9 insect cell. It is more than 40-fold selective for Aurora A than Aurora B. Phase 1.                                                                                        | Cell Cycle    | C25H15ClF2N4O2 | free base | N/A | OC(=O)C1=CC=C(NC2=NC3=C(CN=C(C4=CC(CI)=CC=C34)C3=C(F)C=CC=C3F)C=N2)C=C1<br>[c:13,18,24,27,29,33,36,t:3,5,8,10,15,20]   | 6,192 | 4 | 1 | 4  |
| S1103 | ZM 447439              | 44138247 | g6 | L3500-01 | 513,59 | 331771-20-1 | Aurora Kinase            | 103 | 201 | <1 | <a href="http://selleckchem.com/products/ZM-447439.html">http://selleckchem.com/products/ZM-447439.html</a>                         | ZM 447439 is a selective and ATP-competitive inhibitor for Aurora A and Aurora B with IC50 of 110 nM and 130 nM, respectively. It is more than 8-fold selective for Aurora A/B than MEK1, Src, Lck and has little effect against CDK1/2/4, Plk1, Chk1, etc. | Cell Cycle    | C29H31N5O4     | free base | N/A | COC1=C(OCCCN2CCOCC2)C=C2N=CN=C(NC3=CC=C(NC(=O)C4=C(C=CC=C4)C=C3)C2=C1<br>[c:2,17,31,33,36,40,t:15,19,22,24,29]         | 4,118 | 6 | 2 | 10 |
| S1106 | OSU-03012 (AR-12)      | 42582476 | b7 | L3500-01 | 460,45 | 742112-33-0 | PDK                      | 11  | 24  | <1 | <a href="http://selleckchem.com/products/OSU-03012.html">http://selleckchem.com/products/OSU-03012.html</a>                         | OSU-03012 (AR-12) is a potent inhibitor of recombinant PDK-1 (phosphoinositide-dependent kinase 1) with IC50 of 5 µM in a cell-free assay and 2-fold increase in potency over OSU-02067.                                                                    | PI3K/Akt/mTOR | C26H19F3N4O    | free base | N/A | NCC(=O)NC1=CC=C(C(=C1)N1N=C(C=C1)C1=CC2=C(C(=C1)C1=C(C=C(C=C1)C=C2)C(F)(F)F)<br>[c:7,9,13,15,20,22,27,29,32,t:5,18,29] | 5,212 | 2 | 2 | 5  |
| S1109 | BI 2536                | 43442221 | c7 | L3500-01 | 521,66 | 755038-02-9 | PLK                      | 21  | 40  | <1 | <a href="http://selleckchem.com/products/BI-2536.html">http://selleckchem.com/products/BI-2536.html</a>                             | BI2536 is a potent Plk1 inhibitor with IC50 of 0.83 nM in a cell-free assay. It shows 4- and 11-fold greater selectivity against Plk2 and Plk3. Phase 2.                                                                                                    | Cell Cycle    | C28H39N7O3     | free base | N/A | CC[C@H]1N(C2CC(C)C2)C2=NC(NC3=CC=C(C=C3)OC)C(=O)NC3CC(NC)CC3)=NC=C2N(C)C1=O<br>[c:16,18,33,35,t:10,14]                 | 3,548 | 5 | 2 | 7  |
| S1110 | Varespladib (LY315920) | 44134417 | d7 | L3500-01 | 380,39 | 172732-68-2 | Phospholipase (e.g. PLA) | 76  | 200 | <1 | <a href="http://selleckchem.com/products/LY315920(Varespladib).html">http://selleckchem.com/products/LY315920(Varespladib).html</a> | Varespladib (LY315920) is a potent and selective human non-pancreatic secretory phospholipase A2 (hnsPLA) inhibitor with IC50 of 7 nM. Phase 3.                                                                                                             | Metabolism    | C21H20N2O5     | free base | N/A | CCC1=C(C(=O)C(N)=O)C2=C(C=C(C=C2)OCC(O)=O)N1CC1=CC=CC=C1<br>[c:2,11,13,26,28,t:9,24]                                   | 3,078 | 4 | 1 | 8  |
| S1113 | GSK690693              | 43976832 | e7 | L3500-01 | 425,48 | 937174-76-0 | Akt                      | 39  | 92  | <1 | <a href="http://selleckchem.com/products/GSK690693.html">http://selleckchem.com/products/GSK690693.html</a>                         | GSK690693 is a pan-Akt inhibitor targeting Akt1/2/3 with IC50 of 2 nM/13 nM/9 nM in cell-free assays, also sensitive to the AGC kinase family: PKA, PrkX and PKC isozymes. Phase 1.                                                                         | PI3K/Akt/mTOR | C21H27N7O3     | free base | N/A | CCN1C(=NC2=C1C(OC[C@H]1CCN(C1)=CN=C2C#CC(C)C)O)C1=N ON=C1N<br>[r:c:3,5,17,19,31,t:28]                                  | 1,839 | 6 | 2 | 7  |
| S1115 | Odanacatib (MK-0822)   | 42513989 | f7 | L3500-01 | 525,56 | 603139-19-1 | Cysteine Protease        | 100 | 190 | <1 | <a href="http://selleckchem.com/p">http://selleckchem.com/p</a>                                                                     | Odanacatib (MK 0822) is a potent, selective, and neutral inhibitor of cathepsin K (human/rabbit) with IC50 of 0.2 nM/1 nM, and demonstrated high selectivity versus off-target cathepsin B, L, S. Phase 3.                                                  | Proteases     | C25H27F4N3O3S  | free base | N/A | CC(C)(F)C[C@H](N)C[C@@H]1C1=C                                                                                          | 3,978 | 3 | 2 | 10 |

|       |                                    |          |    |          |        |                  |                     |     |     |    |                                                                               |                                                                                                                                                                                                                                     |                                                                                                                                                                                                                                                                                                                                                |                       |                   |                           |                                                                                                                                                                                                                               |                                                                                                                        |        |   |   |   |
|-------|------------------------------------|----------|----|----------|--------|------------------|---------------------|-----|-----|----|-------------------------------------------------------------------------------|-------------------------------------------------------------------------------------------------------------------------------------------------------------------------------------------------------------------------------------|------------------------------------------------------------------------------------------------------------------------------------------------------------------------------------------------------------------------------------------------------------------------------------------------------------------------------------------------|-----------------------|-------------------|---------------------------|-------------------------------------------------------------------------------------------------------------------------------------------------------------------------------------------------------------------------------|------------------------------------------------------------------------------------------------------------------------|--------|---|---|---|
|       |                                    |          |    |          |        |                  |                     |     |     |    | roducts/Oda<br>nacatib-<br>(MK0822).ht<br>ml                                  |                                                                                                                                                                                                                                     |                                                                                                                                                                                                                                                                                                                                                |                       |                   |                           | C=C(C=C1)C1=CC=C(C<br>=C1)S(C)(=O)<br>=O)C(F)(F)C(=O)NC<br>N(C)C1=CC=C2,17,19,t.8,15]                                                                                                                                         |                                                                                                                        |        |   |   |   |
| S1120 | Everolimus<br>(RAD001)             | 44051501 | g7 | L3500-01 | 958,22 | 159351-69-6      | mTOR                | 100 | 104 | <1 | http://selleck<br>chem.com/p<br>roducts/Ever<br>olimus/RAD<br>001).html       | Everolimus (RAD001) is an<br>mTOR inhibitor of FKBP12 with<br>IC50 of 1.6-<br>2.4 nM in a cell-free assay.                                                                                                                          | PI3K/Akt/<br>mTOR                                                                                                                                                                                                                                                                                                                              | C53H83NO1<br>4        | free base         | N/A                       | CO[C@@H]1C[C@H](C[C@H](C<br>C@@H)2C(=O)C@H(C<br>C=C(C)C<br>C@@H(C)C@H(C)C@H(C)C<br>C=C(C)C<br>C)N(C)C@H(C)C@H(C)C<br>C)C@@H(C<br>C)C@@H(C)C(=O)C(=O)C<br>=O)N3CC<br>CC[C@H]3C(=O)O2)OC<br>CC[C@H]1OCCO<br>[r.c:14,33,t:29,31] | 6,164                                                                                                                  | 11     | 2 | 9 |   |
| S1129 | SRT1720 HCl                        | 43662390 | b8 | L3500-01 | 506,02 | 1001645-<br>58-4 | Sirtuin             | 38  | 75  | <1 | http://selleck<br>chem.com/p<br>roducts/SRT<br>1720.html                      | SRT1720 HCl is a selective<br>SIRT1 activator with EC50 of<br>0.16 μM in a cell-free assay,<br>but is<br>>230-fold less potent for SIRT2<br>and SIRT3.                                                                              | Epigeneti<br>cs                                                                                                                                                                                                                                                                                                                                | C25H24CIN<br>7OS      | Hydrochl<br>oride | N/A                       | Cl.O=C(NC1=CC=CC=C1<br>C1=CN2C<br>(CN3CCNCC3)=CSC2=N<br>1)C1=NC2<br>=CC=CC=C2N=C1<br>[r.c:28,36,t:25,32,34,37,t:3,1<br>6,28,36]                                                                                               | 3,018                                                                                                                  | 4      | 2 | 5 |   |
| S1130 | YM155<br>(Sepantronium<br>Bromide) | 44050248 | c8 | L3500-01 | 443,29 | 781661-94-7      | Survivin            | 55  | 124 | 89 | 201                                                                           | http://selleck<br>chem.com/p<br>roducts/YM1<br>55.html                                                                                                                                                                              | YM155 (Sepantronium<br>Bromide) is a potent survivin<br>suppressant by inhibiting<br>Survivin promoter activity with<br>IC50 of 0.54 nM in HeLa-<br>SURP-luc and CHO- SV40-luc<br>cells does not significantly<br>inhibit SV40 promoter activity,<br>but is observed to slightly<br>inhibit the interaction of<br>Survivin with XIAP. Phase 2. | Apoptosi<br>s         | C20H19BrN<br>4O3  | Bromide                   | N/A                                                                                                                                                                                                                           | [Br-<br>]COCCN1C(C)C(=N)N(C)C<br>2=CN=CC<br>=N2)C2=C1C(=O)C1=C(C<br>C=CC=C1) C2=O<br>[r.c:11,13,16,23,25,t:6,9,2<br>1] | -0,733 | 5 | 0 | 5 |
| S1139 | ADL5859 HCl                        | 42681876 | d8 | L3500-01 | 428,95 | 850173-95-4      | Opioid<br>Receptor  | 86  | 200 | 5  | 12                                                                            | http://selleck<br>chem.com/p<br>roducts/ADL<br>-5859.html                                                                                                                                                                           | ADL5859 HCl is a δ- opioid<br>receptor agonist with Ki of 0.8<br>nM, selectivity against opioid<br>receptor κ, μ, and weak<br>inhibitory activity at the hERG<br>channel. Phase 2.                                                                                                                                                             | Neuronal<br>Signaling | C24H29CIN<br>2O3  | Hydrochl<br>oride         | N/A                                                                                                                                                                                                                           | Cl.CCN(C)C(=O)C1=CC<br>=C(C=C1)<br>C1=CC2(CCNCC2)OC2=<br>CC=CC(O)<br>[r.c:11,26,t:7,14,24,29]                          | 3,196  | 2 | 2 | 4 |
| S1141 | Tanespimycin<br>(17-AAG)           | 44057877 | e8 | L3500-01 | 585,69 | 75747-14-7       | HSP (e.g.<br>HSP90) | 100 | 171 | <1 | http://selleck<br>chem.com/p<br>roducts/17-<br>AAG(Geldan<br>amycin).htm<br>l | Tanespimycin (17-AAG) is a<br>potent HSP90 inhibitor with<br>IC50 of 5 nM in a cell-free<br>assay, having a 100-fold higher<br>binding affinity for HSP90<br>derived from tumour cells than<br>HSP90 from normal cells.<br>Phase 2. | Cytoskel<br>etal<br>Signaling                                                                                                                                                                                                                                                                                                                  | C31H43N3O<br>8        | free base         | 27374.NSC-<br>330507, KOS | CO[C@@H]1[C@@H](C)C<br>C2=C(NCC<br>=C)C(=O)C=C(NC(=O)C(C<br>C)C=C<br>C(C)C@H(C)C@H(C)C@H(C)<br>C(N)=O)<br>C)C=C(C)C@H(C)C@H(C)<br>1)C2=O<br>[r.c:7,23,t:15,21,34]                                                             | 2,524                                                                                                                  | 7      | 4 | 7 |   |
| S1144 | Ivacaftor (VX-<br>770)             | 43941753 | f8 | L3500-01 | 392,49 | 873054-44-5      | CFTR                | 78  | 199 | <1 | http://selleck<br>chem.com/p                                                  | Ivacaftor (VX-770) is a<br>selective potentiator of CFTR<br>targeting G551D- CFTR and<br>F508del- CFTR with EC50 of<br>100 nM and 25 nM in fisher<br>rat thyroid cells, respectively.                                               | Tran<br>sme<br>mbr<br>ane<br>Tra<br>nsp                                                                                                                                                                                                                                                                                                        | C24H28N2O<br>3        | free base         | N/A                       | CC(C)C1=CC(=C(NC(=O)C2=C<br>NC3=C(C=CC=C3)C2=O                                                                                                                                                                                | 4,516                                                                                                                  | 2      | 3 | 4 |   |





|       |                              |          |     |          |        |              |                          |    |     |    |                                                                                                                                           |                                                                                                                                                                                                                               |                          |              |           |                     |                                                                                                                                                           |       |   |   |   |
|-------|------------------------------|----------|-----|----------|--------|--------------|--------------------------|----|-----|----|-------------------------------------------------------------------------------------------------------------------------------------------|-------------------------------------------------------------------------------------------------------------------------------------------------------------------------------------------------------------------------------|--------------------------|--------------|-----------|---------------------|-----------------------------------------------------------------------------------------------------------------------------------------------------------|-------|---|---|---|
| S1195 | TAK-700 (Orteronel)          | 44126579 | g10 | L3500-01 | 307,35 | 426219-18-3  | P450 (e.g. CYP17)        | 61 | 198 | <1 | <a href="http://selleckchem.com/products/TAK-700.html">http://selleckchem.com/products/TAK-700.html</a>                                   | TAK-700 (Orteronel) is a potent and highly selective human 17,20- lyase inhibitor with IC50 of 38 nM, exhibits >1000- fold selectivity over other CYPs (e.g. 11-hydroxylase and CYP3A4). Phase 3.                             | Metabolism               | C18H17N3O2   | free base | N/A                 | <chem>CNC(=O)C1=CC=C2C=C(C(=CC2=C1)C1(O)CCN2C=NC=C1)c2c3,10,13,21,t4,6,23</chem>                                                                          | 1,075 | 2 | 1 | 2 |
| S1196 | Exemestane                   | 44088294 | b11 | L3500-01 | 296,4  | 107868-30-4  | Aromatase                | 54 | 182 | <1 | <a href="http://selleckchem.com/products/Exemestane.html">http://selleckchem.com/products/Exemestane.html</a>                             | Exemestane is an aromatase inhibitor, inhibits human placental and rat ovarian aromatase with IC50 of 30 nM and 40 nM, respectively.                                                                                          | Endocrinology & Hormones | C20H24O2     | free base | FCE24304, PNU155971 | <chem>[H]C@@12CCC(=O)C@@1(C)C(C)C@@1([H])C@@2([H])CC(=C)C2=CC(F)C=C(C)C@12C</chem><br><small>[r.c:23,t15]</small>                                         | 3,606 | 2 | 0 | 0 |
| S1197 | Finasteride                  | 44050072 | c11 | L3500-01 | 372,54 | 98319-26-7   | 5-alpha Reductase        | 75 | 201 | <1 | <a href="http://selleckchem.com/products/Finasteride.html">http://selleckchem.com/products/Finasteride.html</a>                           | Finasteride is a potent, reversible inhibitor of the rat type 1 5 alpha-reductase with Ki of 10.2 nM, used in the treatment of benign prostatic hyperplasia (BPH) and male pattern baldness (MPB).                            | Endocrinology & Hormones | C23H36N2O2   | free base | MK-906              | <chem>[H]C@@12CC[C@H](C(=O)N(C)C(C)C)C@@1(C)CC[C@@1]([H])C@@2([H])CC(C)C@2([H])NC(=O)C=C[C@1]2C</chem><br><small>[r.c:29]</small>                         | 3,174 | 2 | 2 | 2 |
| S1202 | Dutasteride                  | 44131746 | d11 | L3500-01 | 528,53 | 164656-23-9  | 5-alpha Reductase        | 62 | 117 | <1 | <a href="http://selleckchem.com/products/Dutasteride.html">http://selleckchem.com/products/Dutasteride.html</a>                           | Dutasteride is a dual 5- $\alpha$ reductase inhibitor that inhibits conversion of testosterone to dihydrotestosterone (DHT).                                                                                                  | Endocrinology & Hormones | C27H30F6N2O2 | free base | GI198745, GG-745    | <chem>[H]C@@12CC[C@H](C(=O)NC3=CC(=CC=C3C(F)F)C(F)F)C@@1(C)CC[C@@1]([H])C@@2([H])CC(C)C@2([H])NC(=O)C=C[C@1]2C</chem><br><small>[r.c:18,12,40,t8]</small> | 5,703 | 2 | 2 | 4 |
| S1210 | Methotrexate                 | 44341937 | e11 | L3500-01 | 454,44 | 59-05-2      | DHFR                     | 90 | 198 | <1 | <a href="http://selleckchem.com/products/Abirateraxate.html">http://selleckchem.com/products/Abirateraxate.html</a>                       | Methotrexate (MTX), analog of folic acid, is a nonspecific inhibitor of the dihydrofolate reductase (DHFR) of bacteria and cancerous cells as well as normal cells. It forms an inactive ternary complex with DHFR and NADPH. | Metabolism               | C20H22N8O5   | free base | NCI-C04671          | <chem>CN(CC1=NC2=C(N)N=C(N)N=C2N=C1)C1=CC=C(C=C1)C(=O)N(C)C@1([H])CC(C)C@1([H])NC(=O)C=C[C@1]2C</chem><br><small>[r.c:5,11,14,19,21,t5,8,17]</small>      | 0,114 | 7 | 3 | 9 |
| S1216 | PFI-1 (PF-6405761)           | 44061307 | f11 | L3500-01 | 347,39 | 1403764-72-6 | Epigenetic Reader Domain | 69 | 199 | <1 | <a href="http://selleckchem.com/products/pfi-1.html">http://selleckchem.com/products/pfi-1.html</a>                                       | PFI-1 is a highly selective BET (bromodomain-containing protein) inhibitor for BRD4 with IC50 of 0.22 $\mu$ M and for BRD2 with IC50 of 98 nM in a cell- free assay.                                                          | Epigenetics              | C16H17N3O4S  | free base | N/A                 | <chem>COC1=C(C(=CC=C1)S(=O)(=O)NC1=CC=C2NC(=O)N(C)CC2)C1</chem><br><small>[r.c:4,6,24,t2,13,15]</small>                                                   | 1,376 | 4 | 2 | 4 |
| S1233 | 2-Methoxyestradiol (2-MeOE2) | 43897322 | g11 | L3500-01 | 302,41 | 362-07-2     | HIF                      | 60 | 198 | <1 | <a href="http://selleckchem.com/products/2-Methoxyestradiol(2ME2).html">http://selleckchem.com/products/2-Methoxyestradiol(2ME2).html</a> | 2-Methoxyestradiol (2-MeOE2) depolymerizes microtubules and blocks HIF-1 $\alpha$ nuclear accumulation and HIF-1 transcriptional activity. Phase 2.                                                                           | Angiogenesis             | C19H26O3     | free base | NSC 659853          | <chem>[H]C@@12CC[C@H](O)C@@1(C)C(C)C@@1([H])C3=CC(OC)=C(O)C=C3C@@2([H])C@2([H])C@12</chem><br><small>[r.c:20,t15,17]</small>                              | 3,821 | 1 | 2 | 1 |

|       |                          |          |    |          |        |             |                          |     |     |    |     |                                                                                                                                                           |                                                                                                                                                                  |                          |               |               |                      |                                                                                |        |   |   |    |
|-------|--------------------------|----------|----|----------|--------|-------------|--------------------------|-----|-----|----|-----|-----------------------------------------------------------------------------------------------------------------------------------------------------------|------------------------------------------------------------------------------------------------------------------------------------------------------------------|--------------------------|---------------|---------------|----------------------|--------------------------------------------------------------------------------|--------|---|---|----|
| S1626 | Naproxen Sodium          | 44140933 | b2 | L3500-03 | 252,24 | 26159-34-2  | COX                      | 3   | 12  | 50 | 198 | <a href="http://selleckchem.com/products/Naproxen-Sodium(Aleve).html">http://selleckchem.com/products/Naproxen-Sodium(Aleve).html</a>                     | Naproxen Sodium is a COX inhibitor for COX-1 and COX-2 with IC50 of 8.7 µM and 5.2 µM, respectively.                                                             | Neuronal Signaling       | C14H13NaO3    | Sodium Salt   | RS-3650              | [Na+].COC1=CC=C2C=C(C(=CC2=C1)C@H)(C(=O)O)O                                    | 1,375  | 1 | 0 | 3  |
| S1657 | Enalaprilat Dihydrate    | 43927739 | c2 | L3500-03 | 348,4  | 84680-54-6  | RAAS                     | 70  | 201 | <1 |     | <a href="http://selleckchem.com/products/Enalaprilat.html">http://selleckchem.com/products/Enalaprilat.html</a>                                           | Enalaprilat is an angiotensin-converting enzyme (ACE) inhibitor with IC50 of 1.94 nM.                                                                            | Endocrinology & Hormones | C18H28N2O7    | Dihydrate     | MK-422 Dihydrate     | O.O.C(C@H)(N(C@H)(CCC1=CC=CC=C1)C(O)=O)C(=O)N1CCC(C@H)1C(O)=O                  | -1,53  | 3 | 1 | 8  |
| S1738 | Telmisartan              | 44348419 | d2 | L3500-03 | 514,62 | 144701-48-4 | RAAS                     | 13  | 25  | <1 |     | <a href="http://selleckchem.com/products/Telmisartan(Micardis).html">http://selleckchem.com/products/Telmisartan(Micardis).html</a>                       | Telmisartan is an angiotensin II receptor antagonist (ARB) used in the management of hypertension.                                                               | Endocrinology & Hormones | C33H30N4O2    | free base     | BIBR 277             | CCCC1=NC2=C(C=C(C=C2)C2=N C3=C(C=CC=C3)N2C)N1CC1=CC=C(C(=C1)C1=CC=CC=C1)C(O)=O | 7,799  | 3 | 0 | 7  |
| S1776 | Toremifene Citrate       | 43946954 | e2 | L3500-03 | 598,08 | 89778-27-8  | rogen/progestogen Recept | 100 | 167 | <1 |     | <a href="http://selleckchem.com/products/Toremifene-Citrate(Fareston).html">http://selleckchem.com/products/Toremifene-Citrate(Fareston).html</a>         | Toremifene Citrate is an oral selective estrogen receptor modulator (SERM), used in the treatment of advanced breast cancer.                                     | Endocrinology & Hormones | C32H36ClNO8   | Citrate       | NSC 613680           | OC(=O)CC(O)C(C(O)=O)C(O)=O.CN(C)CCOC1=CC=C(C=C1)C=C(C1=CC=CC=C1)C1=CC=CC=C1    | 1,945  | 4 | 0 | 14 |
| S1801 | Ranitidine Hydrochloride | 44045244 | f2 | L3500-03 | 350,86 | 66357-59-3  | Histamine Receptor       | 70  | 200 | 70 | 200 | <a href="http://selleckchem.com/products/Ranitidine-hydrochloride(Zantac).html">http://selleckchem.com/products/Ranitidine-hydrochloride(Zantac).html</a> | Ranitidine is a histamine H2-receptor antagonist, used to treat stomach or intestinal ulcers.                                                                    | Neuronal Signaling       | C13H23ClN4O3S | Hydrochloride | AH19065              | Cl.CN(C)NCCSCC1=CC=C(C)C1                                                      | 1,421  | 1 | 2 | 10 |
| S1802 | AICAR (Acadesine)        | 44087818 | g2 | L3500-03 | 258,23 | 2627-69-2   | AMPK                     | 51  | 197 | <1 |     | <a href="http://selleckchem.com/products/Acadesine.html">http://selleckchem.com/products/Acadesine.html</a>                                               | AICAR (Acadesine), an AMPK activator, results in accumulation of ZMP, which mimics the stimulating effect of AMP on AMPK and AMPK kinase. Phase 3.               | P13K/Akt/mTOR            | C9H14N4O5     | free base     | NSC105823            | NC(=O)C1=C(N)N(C=N1)C@H)1O[C@H](CO)C@H)1O                                      | -2,913 | 3 | 5 | 3  |
| S1831 | Carvedilol               | 44051317 | b3 | L3500-03 | 406,47 | 72956-09-3  | Adrenergic Receptor      | 81  | 199 | <1 |     | <a href="http://selleckchem.com/products/carvedilol.html">http://selleckchem.com/products/carvedilol.html</a>                                             | Carvedilol is a non-selective beta blocker/alpha-1 blocker, used to treat congestive heart failure (CHF) and high blood pressure.                                | Neuronal Signaling       | C24H26N2O4    | free base     | BM-14190, SKF 105517 | COC1=CC=CC=C1OCCNCC(O)CO C1=C2C(NC3=C2C=CC=C3)=CC=C1                           | 4,014  | 3 | 3 | 10 |
| S1847 | Clemastine Fumarate      | 44130933 | c3 | L3500-03 | 459,96 | 14976-57-9  | Histamine Receptor       | 35  | 76  | <1 |     | <a href="http://selleckchem.com/products/Clemastine-Fumarate.html">http://selleckchem.com/products/Clemastine-Fumarate.html</a>                           | Clemastine Fumarate (Clemastine) is a selective histamine H1 receptor antagonist with IC50 of 3 nM.                                                              | Neuronal Signaling       | C25H30ClNO5   | Fumarate      | N/A                  | OC(=O)C=C(C(O)=O)CN1CCC(C@H)1CCO[C@H](C)C1=C(C=CC=C1)C2=CC=CC=C2               | 1,81   | 3 | 0 | 8  |
| S1880 | Roxatidine Acetate HCl   | 44058134 | d3 | L3500-03 | 384,9  | 93793-83-0  | Histamine Receptor       | 77  | 200 | 77 | 200 | <a href="http://selleckchem.com/products/roxa">http://selleckchem.com/products/roxa</a>                                                                   | Roxatidine Acetate HCl is a specific and competitive histamine H2-receptor antagonist, with IC50 of 3.2 µM, inhibits gastric acid secretion and ulcer formation. | Neuronal Signaling       | C19H29ClNO4   | Hydrochloride | N/A                  | Cl.CC(=O)OCC(=O)NCCOC1=CC=C(C)C1                                               | 2,148  | 4 | 1 | 10 |



|       |                                 |          |    |          |        |             |                   |     |     |    |   |                                                                                                                                               |                                                                                                                                                                                                                                                                                                                                    |                          |               |           |           |                                                                                                 |        |   |   |    |
|-------|---------------------------------|----------|----|----------|--------|-------------|-------------------|-----|-----|----|---|-----------------------------------------------------------------------------------------------------------------------------------------------|------------------------------------------------------------------------------------------------------------------------------------------------------------------------------------------------------------------------------------------------------------------------------------------------------------------------------------|--------------------------|---------------|-----------|-----------|-------------------------------------------------------------------------------------------------|--------|---|---|----|
|       |                                 |          |    |          |        |             |                   |     |     |    |   | lidine-acetate-hcl.html                                                                                                                       |                                                                                                                                                                                                                                                                                                                                    |                          |               |           |           |                                                                                                 |        |   |   |    |
| S1885 | Felodipine                      | 44045279 | e3 | L3500-03 | 384,25 | 72509-76-3  | Calcium Channel   | 77  | 200 | <1 |   | <a href="http://selleckchem.com/products/Felodipine(Plendil).html">http://selleckchem.com/products/Felodipine(Plendil).html</a>               | Felodipine is a selective L-type Ca <sub>2+</sub> channel blocker with IC <sub>50</sub> of 0.15 nM.                                                                                                                                                                                                                                | Transporter Transporters | C18H19Cl2NO4  | free base | CGH-869   | <chem>CCOC(=O)C1=C(C)NC(C)=C(C1C1=CC=CC(C1)=C(O)C</chem>                                        | 3,549  | 4 | 1 | 6  |
| S1905 | Amlodipine                      | 44164229 | f3 | L3500-03 | 408,88 | 88150-42-9  | Calcium Channel   | 82  | 201 | <1 |   | <a href="http://selleckchem.com/products/Amlodipine(Norvasc).html">http://selleckchem.com/products/Amlodipine(Norvasc).html</a>               | Amlodipine is a long-acting calcium channel blocker, used to lower blood pressure and prevent chest pain.                                                                                                                                                                                                                          | Transporter Transporters | C20H25ClN2O5  | free base | UK-48340  | <chem>CCOC(=O)C1=C(COCCN)NC(C)=C(C1C1=CC(C1)C=CC=C1)C</chem>                                    | 1,576  | 5 | 2 | 10 |
| S1909 | Fluvastatin Sodium              | 43943657 | g3 | L3500-03 | 433,45 | 93957-55-2  | HMG-CoA Reductase | 87  | 201 | 1  | 2 | <a href="http://selleckchem.com/products/Fluvastatin-Sodium(Lescol).html">http://selleckchem.com/products/Fluvastatin-Sodium(Lescol).html</a> | Fluvastatin Sodium inhibits HMG-CoA reductase activity with IC <sub>50</sub> of 8 nM in a cell-free assay.                                                                                                                                                                                                                         | Metabolism               | C24H25FN2O4   | Sodium    | XU-62-320 | <chem>[Na+].CC(C)N1C(C=C(C)C)C(C(=O)C(C)C)C(C)C(C(=O)C(C)C)=C(C2=C(C(=O)C=C(C)C)C(C)C)C1</chem> | 2,77   | 0 | 2 | 8  |
| S1913 | Tropicamide                     | 44184081 | b4 | L3500-03 | 284,35 | 1508-75-4   | AChR              | 57  | 200 | <1 |   | <a href="http://selleckchem.com/products/tropicamide.html">http://selleckchem.com/products/tropicamide.html</a>                               | Tropicamide is an anticholinergic and a muscarinic receptor subtype M4 preferring antagonist with IC <sub>50</sub> of 8.0 nM.                                                                                                                                                                                                      | Neuronal Signaling       | C17H20N2O2    | free base | N/A       | <chem>CCN(CC1=CC=NC=C1)C</chem>                                                                 | 1,432  | 2 | 1 | 6  |
| S1959 | Tofenamic Acid                  | 44162976 | c4 | L3500-03 | 261,7  | 13710-19-5  | COX               | 52  | 199 | <1 |   | <a href="http://selleckchem.com/products/tofenamic-acid.html">http://selleckchem.com/products/tofenamic-acid.html</a>                         | Tofenamic Acid is a COX-2 inhibitor with IC <sub>50</sub> of 0.2 μM.                                                                                                                                                                                                                                                               | Neuronal Signaling       | C14H12ClN2O2  | free base | N/A       | <chem>CC1=C(C1)C=CC=C1NC(=O)C</chem>                                                            | 4,16   | 1 | 1 | 3  |
| S2001 | Elvitegravir (GS-9137, JTK-303) | 44168786 | d4 | L3500-03 | 447,88 | 697761-98-1 | Integrase         | 89  | 199 | <1 |   | <a href="http://selleckchem.com/products/Elvitegravir.html">http://selleckchem.com/products/Elvitegravir.html</a>                             | Elvitegravir (GS-9137, JTK-303) is an HIV integrase inhibitor for HIV-1 IIIIB, HIV-2 EHO and HIV-2 ROD with IC <sub>50</sub> of 0.7 nM, 2.8 nM and 1.4 nM in cell-free assays, respectively.                                                                                                                                       | Microbiology             | C23H23ClF5NO5 | free base | N/A       | <chem>COC1=CC=C(C=C1)CC1=C(F)C(C1)=CC=C1)C(=O)C(=CN2[C@H](CO)C(C)C(=O)F</chem>                  | 4,665  | 3 | 1 | 7  |
| S2003 | Maraviroc                       | 44158802 | e4 | L3500-03 | 513,67 | 376348-65-1 | CCR               | 100 | 195 | <1 |   | <a href="http://selleckchem.com/products/Maraviroc.html">http://selleckchem.com/products/Maraviroc.html</a>                                   | Maraviroc is a CCR5 antagonist for MIP-1α, MIP-1β and RANTES with IC <sub>50</sub> of 3.3 nM, 7.2 nM and 5.2 nM in cell-free assays, respectively.                                                                                                                                                                                 | Microbiology             | C29H41F2N5O   | free base | UK-427857 | <chem>CC(C)C1=NN=C(C)N1C1CC2CCC(C1)N2CC[C@H](NC(=O)C1CC(F)F)C1</chem>                           | 3,921  | 3 | 1 | 8  |
| S2005 | Raltegravir (MK-0518)           | 44127912 | f4 | L3500-03 | 444,42 | 518048-05-0 | Integrase         | 88  | 198 | <1 |   | <a href="http://selleckchem.com/products/Raltegravir-(MK-0518).html">http://selleckchem.com/products/Raltegravir-(MK-0518).html</a>           | a potent integrase (IN) inhibitor for WT and S217Q PFV IN with IC <sub>50</sub> of 90 nM and 40 nM in cell-free assays, respectively. It shows greater than 1000-fold selectivity for HIV-1 IN over several related Mg <sup>2+</sup> -dependent enzymes such as HCV polymerase, HIV reverse transcriptase, HIV RNaseH and human α- | Microbiology             | C20H21FN6O5   | free base | N/A       | <chem>CN1C(=O)C(O)=C(N=C1C(C)C)NC(=O)C1=NN=C(C(O)1)C(=O)NCC1=CC=C(F)C=C1</chem>                 | -0,291 | 7 | 3 | 6  |

|       |                               |          |    |          |        |              |                         |     |     |    |     |                                                                                                                                             |                                                                                                                                                                                                                                                                                |                          |               |               |                         |                                                                                                                                                                                                          |        |   |   |    |
|-------|-------------------------------|----------|----|----------|--------|--------------|-------------------------|-----|-----|----|-----|---------------------------------------------------------------------------------------------------------------------------------------------|--------------------------------------------------------------------------------------------------------------------------------------------------------------------------------------------------------------------------------------------------------------------------------|--------------------------|---------------|---------------|-------------------------|----------------------------------------------------------------------------------------------------------------------------------------------------------------------------------------------------------|--------|---|---|----|
| S2006 | Pyrimethamine                 | 43978706 | g4 | L3500-03 | 248,71 | 58-14-0      | DHFR                    | 10  | 40  | <1 |     | <a href="http://selleckchem.com/products/Pyrimethamine.html">http://selleckchem.com/products/Pyrimethamine.html</a>                         | Pyrimethamine is a dihydrofolate reductase (DHFR) inhibitor, used as an antimalarial drug.                                                                                                                                                                                     | Metabolism               | C12H13ClN4    | free base     | N/A                     | CCC1=NC(N)=NC(N)=C1<br>C1=CC=C(C)C=C1<br>[c:5,8,16,t:2,11,13]                                                                                                                                            | 2,75   | 2 | 2 | 2  |
| S2013 | PF-573228                     | 44136496 | b5 | L3500-03 | 491,49 | 869288-64-2  | FAK                     | 26  | 53  | <1 |     | <a href="http://selleckchem.com/products/pf-573228.html">http://selleckchem.com/products/pf-573228.html</a>                                 | PF-573228 is an ATP-competitive inhibitor of FAK with IC50 of 4 nM in a cell-free assay, ~50- to 250-fold selective for FAK than Pyk2, CDK1/7 and GSK-3β.                                                                                                                      | Angiogenesis             | C22H20F3N5O3S | free base     | N/A                     | CS(=O)(=O)C1=CC(CNC2=NC(NC3=CC4=C(NC(=O)CC4)C=C3)=NC=C2)F5C=C1<br>[r:2,7,15,35,14,9,13,15]                                                                                                               | 3,967  | 5 | 3 | 7  |
| S2018 | ENMD-2076 L-(+)-Tartaric acid | 43910464 | c5 | L3500-03 | 525,56 | 1291074-87-7 | Aurora Kinase,FLT3,VEGF | 100 | 190 | <1 |     | <a href="http://selleckchem.com/products/enmd-2076-l-tartaric-acid.html">http://selleckchem.com/products/enmd-2076-l-tartaric-acid.html</a> | ENMD-2076 L-(+)-Tartaric acid is the tartaric acid of ENMD-2076, selective activity against Aurora A and FLT3 with IC50 of 14 nM and 1.86 nM, 25-fold more selective for Aurora A than Aurora B and less potent to VEGFR2/KDR and VEGFR3, FGFR1 and FGFR2 and PDGFRα. Phase 2. | Angiogenesis             | C25H31N7O6    | free base     | N/A                     | C[C@H](C[C@@H](O)C(O)=O)C(O)=O<br>=O.CN1CC(NC(C1)C1=NC(C=C1)C2=CC=CC=C2)=NC(NC2=NNC(C)C)C2=C1<br>[r:24,25,28,36,38,t:17,22]                                                                              | -0,683 | 5 | 4 | 8  |
| S2020 | Formoterol Hemifumarate       | 43949271 | d5 | L3500-03 | 402,4  | 43229-80-7   | Adrenergic Receptor     | 80  | 199 | <1 |     | <a href="http://selleckchem.com/products/formoterol-hemifumarate.html">http://selleckchem.com/products/formoterol-hemifumarate.html</a>     | Formoterol Hemifumarate is a potent, selective and long-acting β2- adrenoceptor agonist used in the management of asthma and chronic obstructive pulmonary disease(COPD).                                                                                                      | Neuronal Signaling       | C42H52N4O12   | Hemifumarate  | CGP 25827A<br>NSC 29958 | OC(=O)C=C(C)C(O)=O.CO<br>C1=CC=C(C(C)C)NC(C)C[C@@H](O)C2=CC=C(C(O)C(NC=O)=C2)C=C1.CO.C1=CC=C(C=C1)C(C)C[C@@H](O)NC(C)C[C@@H](O)C2=CC=C(C(O)C(NC=O)=C2)C=C1<br>[r:c:28,31,54,57,t:9,11,20,22,35,37,46,48] | -1,526 | 6 | 8 | 18 |
| S2026 | Ginkgolide A                  | 43656175 | e5 | L3500-03 | 408,4  | 15291-75-5   | GABA Receptor           | 81  | 198 | <1 |     | <a href="http://selleckchem.com/products/ginkgolide-a.html">http://selleckchem.com/products/ginkgolide-a.html</a>                           | Ginkgolide A is an extract from Ginkgo biloba and a g-aminobutyric acid (GABA) antagonist with a Ki of 14.5 μM.                                                                                                                                                                | Neuronal Signaling       | C20H24O9      | free base     | BN52020                 | [H]C@112CC34[C@@]5([H])C(C)C[C@@H](C)C(C)C33[C@@H](O)C(=O)C[C@H]3O[C@@]4(C)C(=O)N1C[C@@H](C)C(=O)                                                                                                        | -0,022 | 7 | 1 | 1  |
| S2032 | Rebamipide                    | 44169142 | f5 | L3500-03 | 370,79 | 90098-04-7   | Others                  | 74  | 200 | <1 |     | <a href="http://selleckchem.com/products/rebamipide.html">http://selleckchem.com/products/rebamipide.html</a>                               | Rebamipide is a cholecystokinin type 1 (CCK1) receptor inhibitor for inhibiting [125I]BH-CCK-8S with IC50 of 37.7 μM.                                                                                                                                                          | Others                   | C19H15ClN2O4  | free base     | OPC-12759               | OC(=O)C(CC1=CC(=O)N2=C1C=CC=C2)NC(=O)C1=CC=C(C)C1<br>[r:10,13,14,26,t:5,21,23]                                                                                                                           | 2,606  | 3 | 2 | 5  |
| S2042 | Cyproterone Acetate           | 44356271 | g5 | L3500-03 | 416,94 | 427-51-0     | Androgen Receptor       | 83  | 199 | <1 |     | <a href="http://selleckchem.com/products/cyproterone-acetate.html">http://selleckchem.com/products/cyproterone-acetate.html</a>             | Cyproterone acetate is an androgen receptor (AR) antagonist with IC50 of 7.1 nM, as well as a weak progesterone receptor agonist with weak progestational and glucocorticoid activity.                                                                                         | Endocrinology & Hormones | C24H29ClO4    | free base     | N/A                     | [H]C[C@@]12CC[C@](O)C(C)=O(C)C(=O)C[C@@]1(C)CC[C@@]1([H])C[C@@]2([H])C=C(C)C2=CC(=O)C[C@@]3[C@@]([H])C[C@@]3(C)C1<br>[r:14,22,25]                                                                        | 3,314  | 4 | 0 | 3  |
| S2043 | Memantine HCl                 | 43906391 | b6 | L3500-03 | 215,76 | 41100-52-1   | PA                      | 43  | 199 | 30 | 139 | <a href="http://selleckchem.com/products/memantine-hcl.html">http://selleckchem.com/products/memantine-hcl.html</a>                         | Memantine HCl is a CYP2B6 and CYP2D6                                                                                                                                                                                                                                           | Neuronal                 | C12H22ClN     | Hydrochloride | N/A                     |                                                                                                                                                                                                          | 2,289  | 0 | 1 | 0  |

|       |                      |          |    |          |         |                      |                    |     |     |    |                                                      |                                                                                             |                                                                                                                                                                 |                          |                 |               |                                  |                                                                                                                                                                                                                                                                    |       |   |   |    |
|-------|----------------------|----------|----|----------|---------|----------------------|--------------------|-----|-----|----|------------------------------------------------------|---------------------------------------------------------------------------------------------|-----------------------------------------------------------------------------------------------------------------------------------------------------------------|--------------------------|-----------------|---------------|----------------------------------|--------------------------------------------------------------------------------------------------------------------------------------------------------------------------------------------------------------------------------------------------------------------|-------|---|---|----|
|       |                      |          |    |          |         | Receptor-kainate Rec |                    |     |     |    | chem.com/products/mantine-hydrochloride-namenda.html | inhibitor for recombinant CYP2B6 and CYP2D6 with $K_i$ of 0.51 nM and 943 pM, respectively. | Signaling                                                                                                                                                       |                          | oride           |               | Cl.CC12CC3CC(C)(C1)C(C(N)(C3)C 2 |                                                                                                                                                                                                                                                                    |       |   |   |    |
| S2051 | Captopril            | 43946587 | e6 | L3500-03 | 217,29  | 62571-86-2           | RAAS               | 43  | 198 | 2  | 9                                                    | http://selleckchem.com/products/captopril-captopen.html                                     | Captopril is an angiotensin-converting enzyme (ACE) inhibitor with IC50 of 6 nM.                                                                                | Endocrinology & Hormones | C9H15NO3S       | free base     | SQ 14225                         | C[C@H](CS)C(=O)N1CC[C@H]1                                                                                                                                                                                                                                          | 0,667 | 2 | 0 | 3  |
| S2061 | Lovastatin           | 44135419 | d6 | L3500-03 | 404,54  | 75330-75-5           | HMG-CoA Reductase  | 8   | 20  | <1 |                                                      | http://selleckchem.com/products/lovastatin-mevacor.html                                     | Lovastatin is an inhibitor of HMG-CoA reductase with IC50 of 3.4 nM in a cell-free assay, used for lowering cholesterol (hypolipidemic agent).                  | Metabolism               | C24H36O5        | free base     | MK-803                           | [H]C@12[C@H](C[C@@H](C)C=C1C[C@H](C)C@@H)2CC[C@@H]1C[C@@H](O)CC(=O)N1[C@@H](C)CC                                                                                                                                                                                   | 4,218 | 4 | 1 | 7  |
| S2065 | Lafutidine           | 43909646 | e6 | L3500-03 | 431,55  | 118288-08-7          | Histamine Receptor | 86  | 199 | <1 |                                                      | http://selleckchem.com/products/lafutidine.html                                             | Lafutidine, a newly developed histamine H2-receptor antagonist, inhibits gastric acid secretion.                                                                | Neuronal Signaling       | C22H29N3O4S     | free base     | FRG-8813                         | O=C(CS(=O)CC1=CC=C(O1)NC(C=C(C)OC1=CC(CN2CCCC2)=CC=N1c.c:8,28,30,t:6,18]                                                                                                                                                                                           | 1,987 | 5 | 1 | 11 |
| S2077 | Atorvastatin Calcium | 44135100 | f6 | L3500-03 | 1155,34 | 134523-03-8          | HMG-CoA Reductase  | 100 | 87  | <1 |                                                      | http://selleckchem.com/products/atorvastatin-calcium-lipitor.html                           | Atorvastatin Calcium is an inhibitor of HMG-CoA reductase used as a cholesterol-lowering medication that blocks the production of cholesterol.                  | Metabolism               | C66H68CaF2N4O10 | Calcium       | N/A                              | [Ca++].CC(C)C1=C(C(=O)NC2=CC=CC=C2)C(=C(N1CC[C@@H](O)C1C@@H)(O)CC([O-])=O)C1=CC=C(F)C=C1)C1=CC=C(C=C1)C(C(=O)C1=CC(=O)NC2=CC=CC=C2)C(=C(N1CC[C@@H](O)C1C@@H)(O)CC([O-])=O)C1=CC=C(F)C=C1)C1=CC=C(C=C1)r.c:3,10,12,15,35,40,42,47,54,56,59,78,80,81,83,30,32,38,52, | 8,163 | 2 | 6 | 24 |
| S2085 | Trimebutine          | 43950464 | g6 | L3500-03 | 387,47  | 39133-31-8           | Opioid Receptor    | 50  | 129 | <1 |                                                      | http://selleckchem.com/products/trimebutine.html                                            | Trimebutine is an agonist of peripheral mu, kappa and delta opiate receptors, used as spasmolytic agent for treatment of both acute and chronic abdominal pain. | Neuronal Signaling       | C22H29NO5       | free base     | Mebutin                          | CCC(COC(=O)C1=CC(OC)=C(OC)C(OC)=C1)(N(C)C)C1=CC=CC=C1r.c:17,25,27,7,11,23]                                                                                                                                                                                         | 4,115 | 5 | 0 | 10 |
| S2102 | Rasagiline Mesylate  | 43948703 | b7 | L3500-03 | 267,34  | 161735-79-1          | MAO                | 53  | 198 | 53 | 198                                                  | http://selleckchem.com/products/rasagiline-mesylate.html                                    | Rasagiline Mesylate is a new MAO-B inhibitor for the treatment of idiopathic Parkinson's disease.                                                               | Metabolism               | C13H17NO3S      | Mesylate      | TVP-1012                         | CS(O)=O=O.C#CCN[C@@H]1CC[C2=CC=CC=C2]r.c:13,t:11,15]                                                                                                                                                                                                               | 2,705 | 0 | 1 | 2  |
| S2103 | Naltrexone HCl       | 43949096 | c7 | L3500-03 | 377,86  | 16676-29-2           | Opioid Receptor    | 14  | 37  | 14 | 37                                                   | http://selleckchem.com/products/naltrexone-hcl.html                                         | Naltrexone HCl is an opioid receptor antagonist used primarily in the management of alcohol dependence and opioid dependence.                                   | Neuronal Signaling       | C20H24ClNO4     | Hydrochloride | N/A                              | Cl.OC1=CC=C2C[C@H]3N(CC4CC4)CC(C@@4)5[C@@H](OC1=C24)C(=O)CC[C@@]35O[r.c:19,t:1,3]                                                                                                                                                                                  | 2,039 | 2 | 1 | 2  |

|       |                                     |          |    |          |        |              |                     |     |     |    |     |                                                                                                                                             |                                                                                                                                                                                                                                                                                                                   |                          |              |               |     |                                                                                |                                |        |   |   |    |
|-------|-------------------------------------|----------|----|----------|--------|--------------|---------------------|-----|-----|----|-----|---------------------------------------------------------------------------------------------------------------------------------------------|-------------------------------------------------------------------------------------------------------------------------------------------------------------------------------------------------------------------------------------------------------------------------------------------------------------------|--------------------------|--------------|---------------|-----|--------------------------------------------------------------------------------|--------------------------------|--------|---|---|----|
| S2104 | Levosulpiride                       | 44133891 | d7 | L3500-03 | 341,43 | 23672-07-3   | Dopamine Receptor   | 69  | 202 | <1 |     | <a href="http://selleckchem.com/products/levosulpiride-levogastrol.html">http://selleckchem.com/products/levosulpiride-levogastrol.html</a> | Levosulpiride is a selective antagonist for D2 dopamine receptors used as an antipsychotic and prokinetic agent.                                                                                                                                                                                                  | Neuronal Signaling       | C15H23N3O4S  | free base     | N/A | CCN1CCC(C@H)1CNC(=O)C1=C(OC)C=CC(=C1)S(N)(=O)F                                 | [r.c.12,16,18]                 | 0,704  | 4 | 2 | 6  |
| S2109 | Imidapril HCl                       | 43942365 | e7 | L3500-03 | 441,91 | 89396-94-1   | RAAS                | 88  | 199 | 54 | 122 | <a href="http://selleckchem.com/products/imidapril-tanatri.html">http://selleckchem.com/products/imidapril-tanatri.html</a>                 | Imidapril HCl is an angiotensin-converting enzyme (ACE) inhibitor with IC50 of 2.6 nM, used for the treatment of hypertension.                                                                                                                                                                                    | Endocrinology & Hormones | C20H27N3O6   | Hydrochloride | N/A | CCOC(=O)C(C@H)(CCC1=CC=CC=C1)N(C@@H)(C(C)=O)N(C@@H)(C)C(O)=O                   | [r.c.10,12,16]                 | -1,197 | 5 | 1 | 10 |
| S2149 | GSK1292263                          | 42370968 | f7 | L3500-03 | 456,56 | 1032823-75-8 | GPR                 | 34  | 74  | <1 |     | <a href="http://selleckchem.com/products/GSK1292263.html">http://selleckchem.com/products/GSK1292263.html</a>                               | GSK1292263 is a novel GPR119 agonist, showing potential for the treatment of type 2 diabetes. Phase 2.                                                                                                                                                                                                            | Endocrinology & Hormones | C23H28N4O4S  | free base     | N/A | CC(C)C1=NOC(=N1)N1CC(COC2=CN=C(C=C2)C2=CC=C(C=C2)S(C(=O)N1)C1                  | [r.c.17,19,24,26,t.3,15,22]    | 3,893  | 7 | 0 | 7  |
| S2151 | Sonidegib (Erismodegib, NVP-LDE225) | 44199015 | g7 | L3500-03 | 485,5  | 956697-53-3  | Hedgehog/Smoothened | 97  | 200 | <1 |     | <a href="http://selleckchem.com/products/LDE225(NVP-LDE225).html">http://selleckchem.com/products/LDE225(NVP-LDE225).html</a>               | Sonidegib (Erismodegib, NVP-LDE225) is a Smoothened (Smo) antagonist, inhibiting Hedgehog (Hh) signaling with IC50 of 1.3 nM (mouse) and 2.5 nM (human) in cell-free assays, respectively.                                                                                                                        | Stem Cells & Wnt         | C26H26F3N3O3 | free base     | N/A | C[C@H]1CN(C[C@@H](C)O)C1=CC=C(NC(=O)C2=C(C)C(=CC=C2)C2=CC=C(C(OC(F)F)F)C=C2)C1 | [r.c.19,21,33,36,t.9,11,22,24] | 6,732  | 4 | 1 | 6  |
| S2153 | CGS 21680 HCl                       | 42396473 | b8 | L3500-03 | 535,98 | 124431-80-7  | Adenosine Receptor  | 100 | 187 | <1 |     | <a href="http://selleckchem.com/products/CGS-21680-hydrochloride.html">http://selleckchem.com/products/CGS-21680-hydrochloride.html</a>     | CGS 21680 HCl is an adenosine A2 receptor agonist with IC50 of 22 nM, exhibits 140-fold over A1 receptor.                                                                                                                                                                                                         | GPCR & G Protein         | C23H30ClN7O6 | Hydrochloride | N/A | Cl.CCNC(=O)C(C@H)1O[C@@H](O)C(C@H)1O)N1C=NC2=C1N=C(NCCC1=CC=C(CCC(O)O)C=C1)N   | [r.c.14,16,33,36,t.19,24,26]   | 0,911  | 6 | 5 | 10 |
| S2163 | PF-4708671                          | 43904409 | c8 | L3500-03 | 390,41 | 1255517-76-0 | S6 Kinase           | 30  | 77  | <1 |     | <a href="http://selleckchem.com/products/pf-4708671.html">http://selleckchem.com/products/pf-4708671.html</a>                               | PF-4708671 is a cell-permeable inhibitor of p70 ribosomal S6 kinase (S6K1 isoform) with Ki/IC50 of 20 nM/160 nM in cell-free assays, 400- fold greater selectivity for S6K1 than S6K2, and 4- and >20-fold selectivity for S6K1 than MSK1 and RSK1/2, respectively. First S6K1-specific inhibitor to be reported. | PI3K/Akt/mTOR            | C19H21F3N6   | free base     | N/A | CCC1=CN=CN=C1N1CCN(C2=N(C3=C(N2)C=CC(=C3)C(F)F)F)F                             | [r.c.18,19,20,22,t.2,14]       | 3,886  | 3 | 1 | 5  |
| S2168 | PD128907 HCl                        | 43453455 | d8 | L3500-03 | 285,77 | 112960-16-4  | Dopamine Receptor   | 12  | 42  | 50 | 175 | <a href="http://selleckchem.com/products/PD-128907.html">http://selleckchem.com/products/PD-128907.html</a>                                 | PD 128907 HCl is a potent and selective dopamine D3 receptor agonist, with EC50 of 0.64 nM, exhibits 53-fold selectivity over dopamine D2 receptor.                                                                                                                                                               | Neuronal Signaling       | C14H20ClNO3  | Hydrochloride | N/A | Cl.[H]C(C@)12COC3=CC=C(O)C=C3[C@]1([H])OCCN2CCC                                | [r.c.9,t.4,6]                  | 2,463  | 2 | 1 | 2  |
| S2178 | AG-14361                            | 44359424 | e8 | L3500-03 | 320,39 | 328543-09-5  | PARP                | 12  | 37  | <1 |     | <a href="http://selleckchem.com/p">http://selleckchem.com/p</a>                                                                             | AG14361 is a potent inhibitor of PARP1 with Ki of <5 nM in a cell-free assay. It is at least 1000- fold more potent than the benzamides.                                                                                                                                                                          | DNA Damage               | C19H20N4O    | free base     | N/A | CN(C)CC1=CC=C(C=C1)C1=NC2=                                                     |                                | 2,576  | 2 | 1 | 3  |



|       |                          |          |     |          |        |             |                             |     |     |    |     |                                                                              |                                                                                                                                                                                                                              |                                                       |                   |                |                         |                                                                                                                                           |                                                     |   |   |    |  |  |
|-------|--------------------------|----------|-----|----------|--------|-------------|-----------------------------|-----|-----|----|-----|------------------------------------------------------------------------------|------------------------------------------------------------------------------------------------------------------------------------------------------------------------------------------------------------------------------|-------------------------------------------------------|-------------------|----------------|-------------------------|-------------------------------------------------------------------------------------------------------------------------------------------|-----------------------------------------------------|---|---|----|--|--|
|       |                          |          |     |          |        |             |                             |     |     |    |     | chem.com/p<br>roducts/PF-<br>3716556.ht<br>ml                                |                                                                                                                                                                                                                              | orte<br>rs                                            |                   |                |                         |                                                                                                                                           | =C(C)N=<br>C2C(N)C@@H2CCOC3<br>=CC=CC(C)<br>=C23)OC |   |   |    |  |  |
| S2228 | Belnacasan (VX-765)      | 44113798 | b10 | L3500-03 | 509    | 273404-37-8 | Caspase                     | 100 | 196 | <1 |     | http://selleck<br>chem.com/p<br>roducts/VX-<br>765.html                      | Belnacasan (VX-765) is a potent and selective inhibitor of caspase-1 with Ki of 0.8 nM in a cell-free assay. Phase 2.                                                                                                        | Apoptosi<br>s                                         | C24H33CIN<br>4O6  | free base      | N/A                     | CCOC(C@@H)1OC(=O)C<br>C@@H1<br>NC(=O)C@@H1CCCN<br>1C(=O)C<br>@@H((NC(=O)C1=CC(C<br>I)=C(N)C= C1)C(C)(C)<br>[r.c:31.t:25,28]               | 1,698                                               | 6 | 3 | 8  |  |  |
| S2230 | Galunisertib (LY2157299) | 43880930 | c10 | L3500-03 | 369,42 | 700874-72-2 | TGF-<br>beta/Smad           | 74  | 200 | <1 |     | http://selleck<br>chem.com/p<br>roducts/ly21<br>57299.html                   | Galunisertib (LY2157299) is a potent TGFβ receptor I (TβRI) inhibitor with IC50 of 56 nM in a cell-free assay. Phase 2/3.                                                                                                    | TGF-<br>beta/Smad                                     | C22H19N5O         | free base      | N/A                     | CC1=CC=CC(=N)C1=N<br>N2CCCC2<br>=C1C1=CC=NC2=C1C=<br>C(C=C2)C( N)=O<br>[c:3,5,15,20,22,25,27,t:1,8<br>.18]                                | 3,095                                               | 4 | 1 | 3  |  |  |
| S2233 | Esomeprazole sodium      | 43976369 | d10 | L3500-03 | 367,4  | 161796-78-7 | ATPase                      | 73  | 199 | 73 | 199 | http://selleck<br>chem.com/p<br>roducts/eso<br>meprazole-<br>sodium.html     | Esomeprazole Sodium is a sodium salt of esomeprazole that is a potent proton pump inhibitor with an IC50 of 0.076 nM.                                                                                                        | Tran<br>sme<br>mbr<br>ane<br>Tra<br>nsp<br>orte<br>rs | C17H18N3N<br>aO3S | Sodium<br>salt | N/A                     | COC1=CC=C2N([Na])C(=<br>NC2=C1)I<br>S@@(=O)CC1=NC=C(C<br>C(C)OC)=C 1C                                                                     | 3,008                                               | 5 | 0 | 5  |  |  |
| S2239 | Tubacin                  | 43643540 | e10 | L3500-03 | 721,86 | 537049-40-4 | HDAC                        | 100 | 139 | <1 |     | http://selleck<br>chem.com/p<br>roducts/Tub<br>acin.html                     | Tubacin is a highly potent and selective, reversible, cell-permeable HDAC6 inhibitor with an IC50 of 4 nM in a cell-free assay, approximately 350-fold selectivity over HDAC1.                                               | Cytoskel<br>etal<br>Signaling                         | C41H43N3O<br>7S   | Free<br>Base   | N/A                     | OCC1=CC=C(C=C1)C@<br>@H1C(C<br>@H)C(CSC2=NC(=C(O2)C<br>2=CC=CC<br>=C2)C2=CC=CC=C2)O(C<br>@H)(O1<br>)C1=CC=C(NC(=O)CCC<br>CCCC(=O) NO)C=C1 | 7,181                                               | 6 | 3 | 16 |  |  |
| S2262 | Apigenin                 | 43038898 | f10 | L3500-03 | 270,24 | 520-36-5    | P450 (e.g.<br>CYP17)        | 54  | 200 | <1 |     | http://selleck<br>chem.com/p<br>roducts/Apig<br>enin.html                    | Apigenin is a potent P450 inhibitor for CYP2C9 with Ki of 2 μM.                                                                                                                                                              | Metabolis<br>m                                        | C15H10O5          | free base      | NSC 83244, LY<br>080400 | OC1=CC=C(C=C1)C1=C<br>C(=O)C2=<br>C(O)C(=O)C=C2O<br>[c:3,5,12,19,t:1,8,16]                                                                | 2,41                                                | 2 | 3 | 1  |  |  |
| S2270 | Bergenin                 | 43964667 | g10 | L3500-03 | 328,27 | 477-90-7    | Others                      | 66  | 201 | <1 |     | http://selleck<br>chem.com/p<br>roducts/Ber<br>genin-<br>(Cuscutin).h<br>tml | Bergenin is trihydroxybenzoic acid glycoside and the C-glycoside of 4-O-methyl gallic acid.                                                                                                                                  | Others                                                | C14H16O9          | free base      | Cuscutin                | [H]C@12OC(=O)C3=C(C<br>C(O)=C(C<br>C(C)O)=C3)C@11(H)O[<br>C@H](CO<br>)C@H(CO)C@H(C)C@H2O<br>[r.c:49.t:58]                                 | -0,849                                              | 4 | 5 | 2  |  |  |
| S2285 | Cryptotanshinone         | 43933848 | b11 | L3500-03 | 296,36 | 35825-57-1  | STAT                        | 5   | 17  | <1 |     | http://selleck<br>chem.com/p<br>roducts/Cry<br>ptotanshino<br>n e.html       | Cryptotanshinone is a STAT3 inhibitor with IC50 of 4.6 μM in a cell-free assay, strongly inhibits phosphorylation of STAT3 Tyr705, with a small effect on STAT3 Ser727, but none against STAT1 nor STAT5.                    | JAK/STA<br>T                                          | C19H20O3          | free base      | N/A                     | C[C@H]1COC2=C1C(=O<br>)C(=O)C1<br>=C3CCCC(C)(C)C3=CC=<br>C21<br>[r.c:4,11,20,t:22]                                                        | 3,761                                               | 3 | 0 | 0  |  |  |
| S2341 | (-)-Parthenolide         | 44088983 | c11 | L3500-03 | 248,32 | 20554-84-1  | HDAC,NF-<br>κB,Mdm2,p5<br>3 | 49  | 197 | <1 |     | http://selleck                                                               | (-)-Parthenolide, an inhibitor of the Nuclear Factor-κB Pathway, specifically depletes HDAC1 protein without affecting other class I/II HDACs Also promotes the ubiquitination of MDM2 and activates p53 cellular functions. | NF-κB                                                 | C15H20O3          | free base      | N/A                     | CC1=CCC(C@@)2(C)O                                                                                                                         | 2,923                                               | 3 | 0 | 0  |  |  |

|       |                                 |          |     |          |        |             |                      |    |     |    |                                                                                       |                                                                                                                                                                                                                                               |                                                                                                                                                                                       |                                                       |                 |                                 |     |  |  |  |  |                                                                                                                     |                                                          |      |   |   |   |
|-------|---------------------------------|----------|-----|----------|--------|-------------|----------------------|----|-----|----|---------------------------------------------------------------------------------------|-----------------------------------------------------------------------------------------------------------------------------------------------------------------------------------------------------------------------------------------------|---------------------------------------------------------------------------------------------------------------------------------------------------------------------------------------|-------------------------------------------------------|-----------------|---------------------------------|-----|--|--|--|--|---------------------------------------------------------------------------------------------------------------------|----------------------------------------------------------|------|---|---|---|
|       |                                 |          |     |          |        |             |                      |    |     |    | chem.com/p<br>roducts/Part<br>henolide(-)-<br>Parthenoid<br>e).html                   |                                                                                                                                                                                                                                               |                                                                                                                                                                                       |                                                       |                 |                                 |     |  |  |  |  | C@H]2[C<br>@H]2OC(=O)C(=C)[C@<br>@H]2CC1                                                                            |                                                          |      |   |   |   |
| S2437 | Rotundine                       | 43452428 | d11 | L3500-03 | 355,43 | 483-14-7    | Dopamine<br>Receptor | 8  | 23  | <1 | http://sel<br>leckchem.com/p<br>roducts/rotu<br>ndine.html                            | Rotundine (L-<br>tetrahydropalmatine, L- THP) is a<br>selective dopamine D1 receptor<br>antagonist with IC50 of 166 nM.                                                                                                                       | Neuronal<br>Signaling                                                                                                                                                                 | C21H25NO4                                             | free base       | N/A                             |     |  |  |  |  | [H][C@@]12CC3=CC=C(C<br>OC)(OC)<br>=C3CN1CCC1=C2C=C(<br>OC)(OC)= C1<br>[r.c:11,19,28,t:3,5,22]                      | 3,599                                                    | 4    | 0 | 4 |   |
| S2449 | Forskolin                       | 44193380 | e11 | L3500-03 | 410,5  | 66575-29-9  | cAMP                 | 82 | 200 | <1 | http://sel<br>leckchem.com/p<br>roducts/fors<br>kolin.html                            | Forskolin is a ubiquitous activator<br>of eukaryotic adenylyl cyclase<br>(AC) in a wide variety of cell<br>types, commonly used to raise<br>levels of cAMP in the study and<br>research of cell physiology.                                   | GPCR &<br>G Protein                                                                                                                                                                   | C22H34O7                                              | free base       | Coleonol                        |     |  |  |  |  | [H][C@@]12[C@H](O)[C<br>@H](OC)<br>=O][C@@]3(C)O[C@](C<br>)CC(=O)<br>C@]3(O)[C@@]1(C)[C@<br>@H](O)C CC2(C)C=C-<br>H | 0,837                                                    | 4    | 2 | 3 |   |
| S2454 | Bupivacaine HCl                 | 44183221 | f11 | L3500-03 | 324,89 | 18010-40-7  | Sodium<br>Channel    | 65 | 200 | 23 | 71                                                                                    | http://sel<br>leckchem.com/p<br>roducts/Bup<br>ivacaine-<br>hydrochlorid<br>e(Marcain).<br>html                                                                                                                                               | Bupivacaine HCl binds to the<br>intracellular portion of voltage-<br>gated sodium channels and<br>blocks sodium influx into nerve<br>cells, used for treating cardiac<br>arrhythmias. | Tran<br>sme<br>mbr<br>ane<br>Tra<br>nsp<br>orte<br>rs | C18H29ClN<br>2O | Hydrochl<br>oride               | N/A |  |  |  |  | Cl.CCCCC1CCCCC1C(=O)<br>N1=C(C)C=C=C1C<br>[c:14,17,19]                                                              | 4,692                                                    | 1    | 1 | 5 |   |
| S2496 | Ozagrel                         | 43948969 | g11 | L3500-03 | 228,25 | 82571-53-7  | P450 (e.g.<br>CYP17) | 46 | 202 | <1 | http://sel<br>leckchem.com/p<br>roducts/Oza<br>grel.html                              | Ozagrel is a selective<br>thromboxane A(2) (TXA(2))<br>synthetase inhibitor with IC50 of<br>11 nM for rabbit platelet, used<br>for the improvement of<br>postoperative cerebrovascular<br>contraction and accompanying<br>cerebral ischaemia. | Metabolis<br>m                                                                                                                                                                        | C13H12N2O<br>2                                        | free base       | OKY-046                         |     |  |  |  |  | OC(=O)C=C(C)C1=CC=C(C<br>CN)C=C1<br>[c:14,13,16,t:5,7]                                                              | 1,604                                                    | 2    | 0 | 4 |   |
| S7414 | Caffeic Acid<br>Phenethyl Ester | 43928825 | b2  | L3500-08 | 284,31 | 104594-70-9 | NF-κB                | 57 | 200 | <1 | http://sel<br>leckchem.com/p<br>roducts/caff<br>eic-acid-<br>phenethyl-<br>ester.html | Caffeic acid phenethyl ester is a<br>potent and specific inhibitor of<br>NF- κB activation, and also<br>displays antioxidant,<br>immunomodulatory and<br>antiinflammatory activities.                                                         | NF-κB                                                                                                                                                                                 | C17H16O4                                              | free base       | APE,<br>Phenylethyl<br>Caffeate |     |  |  |  |  | OC1=CC=C(C(=C(C(=O)<br>O)CC2=C<br>C=CC=C2)C=C1O<br>[c:14,16,19,t:1,3,12]                                            | 3,573                                                    | 2    | 2 | 6 |   |
| S7421 | CGP 57380                       | 43643696 | c2  | L3500-08 | 244,23 | 522629-08-9 | MNK                  | 48 | 197 | <1 | http://sel<br>leckchem.com/p<br>roducts/cgp<br>57380.html                             | CGP 57380 is a potent MNK1<br>inhibitor with IC50 of 2.2 μM,<br>exhibiting no inhibitory activity on<br>p38, JNK1, ERK1 and -2,<br>PKC, or c-Src-like kinases.                                                                                | MAPK                                                                                                                                                                                  | C11H9FN6                                              | free base       | N/A                             |     |  |  |  |  | NC1=C2C(NC3=CC=C(F<br>)C=C3)=N NC2=NC=N1<br>[c:1,10,12,16,18,t:5,7]                                                 | 1,981                                                    | 3    | 3 | 2 |   |
| S7424 | PD 151746                       | 43474748 | d2  | L3500-08 | 237,25 | 179461-52-0 | Cysteine<br>Protease | 47 | 198 | <1 | http://sel<br>leckchem.com/p<br>roducts/pd-<br>151746.html                            | PD 151746 is a<br>selective, cell-permeable calpain<br>inhibitor with Ki of<br>0.26 μM for μ-Calpain, about 20-<br>fold selectivity over m-calpain.                                                                                           | Protease<br>s                                                                                                                                                                         | C11H8FNO2                                             | free base       | N/A                             |     |  |  |  |  |                                                                                                                     | OC(=O)C(S)=C(C)C1=CNC<br>2=CC=C(F)C=C12<br>[t:6,9,11,14] | 2,49 | 1 | 1 | 2 |

|       |            |          |    |          |        |              |                   |     |     |    |                                                                                                               |                                                                                                                                                                                                                                                   |                            |               |           |                     |                                                                                                                                                                                                    |       |   |   |    |
|-------|------------|----------|----|----------|--------|--------------|-------------------|-----|-----|----|---------------------------------------------------------------------------------------------------------------|---------------------------------------------------------------------------------------------------------------------------------------------------------------------------------------------------------------------------------------------------|----------------------------|---------------|-----------|---------------------|----------------------------------------------------------------------------------------------------------------------------------------------------------------------------------------------------|-------|---|---|----|
| S7430 | SB-3CT     | 44090853 | e2 | L3500-08 | 306.4  | 292605-14-2  | MMP               | 61  | 199 | <1 | <a href="http://selleckchem.com/products/sb-3ct.html">http://selleckchem.com/products/sb-3ct.html</a>         | SB-3CT is an effective and selective gelatinase inhibitor with Ki of 13.9 nM and 600 nM for MMP- 2 and MMP-9, respectively.                                                                                                                       | Proteases                  | C15H14O3S2    | free base | N/A                 | <chem>O=S(=O)(CC1CS1)C1=C(C=C)OC2=CC=CC=C2C1</chem><br>[c:15,17,20,t:8,10,13]                                                                                                                      | 3,377 | 3 | 0 | 5  |
| S7436 | NH125      | 44090252 | f2 | L3500-08 | 524.56 | 278603-08-0  | CaMK              | 100 | 191 | <1 | <a href="http://selleckchem.com/products/nh125.html">http://selleckchem.com/products/nh125.html</a>           | NH125 is a selective eEF 2 kinase inhibitor with IC50 of 60 nM, >125-fold selectivity over PKC, PKA, and CaMKII, and also a potent histidine kinase inhibitor.                                                                                    | Neuronal Signaling         | C27H45IN2     | iodide    | N/A                 | <chem>[I-].CCCCCCCCCCCCCCCCC[N+](C(C)N)(CC2=CC=CC=C2)C</chem><br>[c:15,23,25,28,t:21]                                                                                                              | 6,032 | 0 | 0 | 17 |
| S7437 | Sal003     | 43466476 | g2 | L3500-08 | 463.21 | 1164470-53-4 | phosphatase       | 93  | 201 | <1 | <a href="http://selleckchem.com/products/sal003.html">http://selleckchem.com/products/sal003.html</a>         | Sal003 is a potent and cell-permeable eIF-2α phosphatase inhibitor.                                                                                                                                                                               | Others                     | C18H15Cl4N3OS | free base | N/A                 | <chem>C1C1=CC=C(C(C=C1)NC(=S)NC(C(C)C)C)C)NC(=O)C=C(C)C</chem><br>[c:3,5,24,26,t:1,22]                                                                                                             | 6,298 | 1 | 3 | 8  |
| S7445 | E3330      | 43469573 | b3 | L3500-08 | 378.46 | 136164-66-4  | DNA/RNA Synthesis | 75  | 198 | <1 | <a href="http://selleckchem.com/products/e3330.html">http://selleckchem.com/products/e3330.html</a>           | E3330 is a potent and selective APE1(Ref-1) inhibitor, which suppressed NF-kappa B DNA-binding activity.                                                                                                                                          | DNA Damage                 | C21H30O6      | free base | N/A                 | <chem>CCCCCCCCC=C(C=C1=C(C)C(=O)C(OC)=C(OC)C1=O)C(O)</chem><br>[c:11,t:18]                                                                                                                         | 4,663 | 5 | 0 | 12 |
| S7449 | CRT0044876 | 43887457 | c3 | L3500-08 | 206.15 | 6960-45-8    | DNA/RNA Synthesis | 41  | 199 | <1 | <a href="http://selleckchem.com/products/crt0044876.html">http://selleckchem.com/products/crt0044876.html</a> | CRT0044876 is a potent and selective APE1 inhibitor with IC50 of ~3 μM.                                                                                                                                                                           | DNA Damage                 | C9H6N2O4      | free base | NSC 69877.7-NO2-ICA | <chem>OC(=O)C1=CC2=C(N1)C(=CC=C2)[N+](O)=O</chem><br>[c:5,9,11,t:3]                                                                                                                                | 1,939 | 1 | 1 | 2  |
| S7457 | XEN445     | 43127263 | d3 | L3500-08 | 366.33 | 1515856-92-4 | Lipase            | 80  | 218 | <1 | <a href="http://selleckchem.com/products/xen445.html">http://selleckchem.com/products/xen445.html</a>         | XEN445 is a potent and selective endothelial lipase inhibitor with IC50 of 0.237 μM.                                                                                                                                                              | Metabolism                 | C18H17F3N2O3R | free base | N/A                 | <chem>[*].OC(=O)C1=CC(=CC=C1N)CC(C@@H)(C1)OCC1=NC=C(C=C1)C(F)(F)F</chem><br>[r,\$(S)-2-(3-(pyridin-2-ylmethoxy)pyrrolidin-1-yl)-5-(trifluoromethyl)benzoic acid_R0].....\$<br>[c:5,7,20,22,t:3,18] | 3,725 | 3 | 0 | 6  |
| S7460 | BTB06584   | 43514837 | e3 | L3500-08 | 417.82 | 219793-45-0  | ATPase            | 84  | 201 | <1 | <a href="http://selleckchem.com/products/btb06584.html">http://selleckchem.com/products/btb06584.html</a>     | BTB06584 is an IF1-dependent, selective inhibitor of the mitochondrial F1 Fo-ATPase.                                                                                                                                                              | Transmembrane Transporters | C19H12ClNO6S  | free base | N/A                 | <chem>[O-].[N+](=O)C1=CC=C(C=C1OC(=O)C1=CC=C(C)C)S(=O)(=O)C</chem><br>[c:9,18,26,28,t:3,15,24]                                                                                                     | 4,923 | 4 | 0 | 6  |
| S7461 | LDC000067  | 42581412 | f3 | L3500-08 | 370.43 | 1073485-20-7 | CDK               | 74  | 200 | <1 | <a href="http://selleckchem.com/products/lcd000067.html">http://selleckchem.com/products/lcd000067.html</a>   | LDC000067 is a highly selective CDK9 inhibitor with IC50 of 44 nM, 55/125/210/ >227/ >227-fold selectivity over CDK2/14/6/7.                                                                                                                      | Cell Cycle                 | C18H18N4O3S   | free base | LDC067              | <chem>OCC1=CC=CC=C1C1=NC=NC(NC2=CC(CS(N)(=O)=CC=C2)C)C=C1</chem><br>[c:7,8,11,22,24,26,t:2,9,15]                                                                                                   | 2,783 | 5 | 2 | 6  |
| S7462 | PI-1840    | 44084277 | g3 | L3500-08 | 394.47 | 1401223-22-0 | Proteasome        | 78  | 198 | <1 | <a href="http://selleckchem.com/products/pi-1840.html">http://selleckchem.com/products/pi-1840.html</a>       | PI-1840 is a reversible and selective chymotrypsin-like (CT-L) inhibitor with IC50 of 27 nM with little effects on the other two major proteasome proteolytic activities, trypsin-like (T- L) and postglutamyl- peptide-hydrolysis-like (PGPH-L). | Proteases                  | C22H26N4O3    | free base | N/A                 | <chem>CCCC1=CC=C(OCC(=O)N(C)C2=N(C(=NO2)C2=CC=CN=C2)C(C)C)C=C1</chem><br>[c:15,21,23,29,t:3,5,13,19]                                                                                               | 3,22  | 6 | 0 | 9  |
| S7467 | LB42708    | 43426837 | b4 | L3500-08 | 555.46 | 226929-39-1  | Transferase       | 100 | 180 | <1 |                                                                                                               | LB42708 is an orally active farnesyltransferase (FTase) inhibitor with IC50 of 0.8, 1.2, and                                                                                                                                                      | Metabolism                 | C30H27BrN     | free base | N/A                 |                                                                                                                                                                                                    | 4,744 | 3 | 0 | 6  |



|       |                         |          |    |          |        |              |                        |     |     |    |                                                                                                                           |                                                                                                                                                                                          |                        |                 |           |            |                                                                                 |                                   |       |   |   |   |
|-------|-------------------------|----------|----|----------|--------|--------------|------------------------|-----|-----|----|---------------------------------------------------------------------------------------------------------------------------|------------------------------------------------------------------------------------------------------------------------------------------------------------------------------------------|------------------------|-----------------|-----------|------------|---------------------------------------------------------------------------------|-----------------------------------|-------|---|---|---|
|       |                         |          |    |          |        |              |                        |     |     |    | <a href="http://selleckchem.com/products/lb42708.html">http://selleckchem.com/products/lb42708.html</a>                   | 2.0 nM toward H-ras, N-ras, and K-ras, respectively.                                                                                                                                     | m                      | 402             |           |            | BrC1=CC=C(CN2C=NC=C2CN2C=C(C(=O)N3CCOCC3)C(=C2)C2=C3C=CC=CC3=CC=C2)C=C1         | 7,9,25,28,30,32,35,37,40,t:1,3,14 |       |   |   |   |
| S7492 | Uprosertib (GSK2141795) | 43950663 | c4 | L3500-08 | 429,25 | 1047634-65-0 | Akt                    | 85  | 198 | <1 | <a href="http://selleckchem.com/products/gsk2141795.html">http://selleckchem.com/products/gsk2141795.html</a>             | Uprosertib (GSK2141795) is a selective, ATP- competitive, and orally bioavailable Akt inhibitor with IC50 of 180 nM, 328 nM, and 38 nM for Akt 1, 2 and 3, respectively.                 | PI3K/Akt/mTOR          | C18H16Cl2F2N4O2 | free base | GSK795     | CN1N=CC(C)=C1C1=C(C)OC(=C1)C(=O)N(C@H)(CN)CC1=CC(F)=CC=C1                       | 7,9,8,12,28,t:22,25               | 3,531 | 3 | 2 | 6 |
| S7497 | CK-636                  | 43460020 | d4 | L3500-08 | 284,38 | 442632-72-6  | Microtubule Associated | 57  | 200 | <1 | <a href="http://selleckchem.com/products/ck-636.html">http://selleckchem.com/products/ck-636.html</a>                     | CK-636 is an Arp2/3 complex inhibitor with IC50 of 4 µM, 24 µM and 32 µM for inhibition of actin polymerization induced by human, fission yeast and bovine Arp2/3 complex, respectively. | Cytoskeletal Signaling | C16H16N2O5S     | free base | CK-0944636 | CC1=C(C(CNC(=O)C2=C(C=CS2)C2=CC=CC=C2N1)C=C1)O,16,18,14                         | 3,335                             | 1     | 2 | 4 |   |
| S7498 | DDR1-IN-1               | 43468531 | e4 | L3500-08 | 552,59 | 1449685-96-4 | Others                 | 100 | 181 | <1 | <a href="http://selleckchem.com/products/ddr1-in-1.html">http://selleckchem.com/products/ddr1-in-1.html</a>               | DDR1-IN-1 is a potent and selective discoidin domain receptor 1 (DDR1) receptor tyrosine kinase inhibitor with IC50 of 105 nM, about 3-fold selectivity over DDR2.                       | Others                 | C30H31F3N4O3    | free base | N/A        | CCN1CCN(CC2=CC=C(C=C2)C(F)(F)F)C(=O)NC2=CC(OC3=CC=C4N(C(=O)CC4=C3)=C(C)C=C2)CC1 | 6,11,34,39,t:7,21,25,27           | 4,972 | 3 | 2 | 8 |
| S7500 | HJC0350                 | 43460788 | f4 | L3500-08 | 277,38 | 885434-70-8  | cAMP                   | 52  | 187 | <1 | <a href="http://selleckchem.com/products/hjc0350.html">http://selleckchem.com/products/hjc0350.html</a>                   | HJC0350 is a potent and selective EPAC2 inhibitor with IC50 of 0.3 µM, exhibiting no inhibition on Epac1.                                                                                | GPCR & G Protein       | C15H19NO2S      | free base | N/A        | CC1=CN(C(C)=C1)S(=O)(=O)C1=C(C)C=C(C)C=C1C                                      | 5,11,17,t:1,14                    | 4,371 | 2 | 0 | 2 |
| S7501 | HO-3867                 | 44093653 | g4 | L3500-08 | 464,55 | 1172133-28-6 | STAT                   | 13  | 28  | <1 | <a href="http://selleckchem.com/products/ho-3867.html">http://selleckchem.com/products/ho-3867.html</a>                   | HO-3867, an analog of curcumin, is a selective STAT3 inhibitor that inhibits its phosphorylation, transcription, and DNA binding without affecting the expression of other active STATs. | JAK/STAT               | C28H30F2N2O2    | free base | N/A        | [H]ON1C(C)(C)C=C(CN2C=C(C)C3=CC=C(F)C=C3)C(=O)C(C2)=C2                          | 7,18,32,t:1,13,15,27,29           | 5,209 | 1 | 0 | 4 |
| S7505 | (S)-crizotinib          | 43959300 | b5 | L3500-08 | 450,34 | 1374356-45-2 | MTH1                   | 42  | 93  | <1 | <a href="http://selleckchem.com/products/s-crizotinib.html">http://selleckchem.com/products/s-crizotinib.html</a>         | (S)-crizotinib, the (S)- enantiomer of crizotinib, is a potent MTH1 (NUDT1) inhibitor with IC50 of 72 nM in a cell- free assay.                                                          | DNA Damage             | C21H22Cl2FN5O   | free base | N/A        | C[C@H](OC1=C(N)N=C(C=C1)C1=CN(C=C1)C1CCNCC1)C(F)(F)F                            | 3,6,8,14,24,27,30,t:11            | 3,693 | 3 | 2 | 5 |
| S7508 | JNK Inhibitor IX        | 44118216 | c5 | L3500-08 | 332,42 | 312917-14-9  | JNK                    | 20  | 60  | <1 | <a href="http://selleckchem.com/products/jnk-inhibitor-ix.html">http://selleckchem.com/products/jnk-inhibitor-ix.html</a> | JNK inhibitor IX is a selective and potent JNK inhibitor with pIC50 of 6.5 and 6.7 for JNK2 and JNK3, respectively.                                                                      | MAPK                   | C20H16N2O5S     | free base | TCS JNK 5a | O=C(NC1=C(C#N)C2=C(C(CCC2)S1)C1=CC=CC2=C1C=C(C=C2)C                             | 3,7,18,20,23,25,t:7,16            | 4,571 | 1 | 1 | 2 |
| S7513 | Trelagliptin            | 44119968 | d5 | L3500-08 | 357,38 | 865759-25-7  | DPP-4                  | 71  | 199 | <1 |                                                                                                                           | Trelagliptin is a highly selective,                                                                                                                                                      | Protease               | C18H20FN5       | free base | SYR-472    | CN1C(=O)C=C(N2CCC[                                                              |                                   | 1,476 | 2 | 1 | 3 |

|       |           |          |    |          |        |              |              |     |     |    |                                                                                                                   |                                                                                                                                                                                                                                                                                       |                         |                 |           |     |                                                                                            |                                           |   |   |   |  |
|-------|-----------|----------|----|----------|--------|--------------|--------------|-----|-----|----|-------------------------------------------------------------------------------------------------------------------|---------------------------------------------------------------------------------------------------------------------------------------------------------------------------------------------------------------------------------------------------------------------------------------|-------------------------|-----------------|-----------|-----|--------------------------------------------------------------------------------------------|-------------------------------------------|---|---|---|--|
|       |           |          |    |          |        |              |              |     |     |    | <a href="http://selleckchem.com/products/trelagliptin.html">http://selleckchem.com/products/trelagliptin.html</a> | long-acting DPP-4 inhibitor. Phase 3.                                                                                                                                                                                                                                                 | s                       | O2              |           |     |                                                                                            | C@H](N)C2N(CC2=CC(F)=CC=C2C#N)C1=C(F)C=C1 |   |   |   |  |
| S7517 | AZD7545   | 43451857 | e5 | L3500-08 | 478,87 | 252017-04-2  | Others       | 95  | 198 | <1 | <a href="http://selleckchem.com/products/azd7545.html">http://selleckchem.com/products/azd7545.html</a>           | AZD7545 is a potent PDHK inhibitor with IC50 of 36.8 nM and 6.4 nM for PDHK1 and PDHK2, respectively. It failed to inhibit PDHK4 at higher concentrations(>10 nM), AZD7545 stimulates PDHK4 activity.                                                                                 | Others                  | C19H18CIF3N2O5S | free base | N/A | CC(=O)C1=CC=C(C=C1)S(=O)(=O)C1=CC(Cl)=C(NC(=O)C@H](C1)C(F)C(F)C(F)C(F)C1                   | 2,913                                     | 4 | 1 | 6 |  |
| S7519 | GNF-5837  | 44098068 | f5 | L3500-08 | 535,49 | 1033769-28-6 | Trk receptor | 100 | 187 | <1 | <a href="http://selleckchem.com/products/gnf-5837.html">http://selleckchem.com/products/gnf-5837.html</a>         | GNF-5837 is a selective, and orally bioavailable pan-TRK inhibitor for TrkA, and TrkB with IC50 of 8 nM, and 12 nM, respectively.                                                                                                                                                     | Protein Tyrosine Kinase | C28H21F4N5O2    | free base | N/A | CC1=CC=C(NC(=O)NC2=CC(=CC=C2F)C(F)(F)C=C1NC1=CC=C2C(NC(=O)C2=C(C2=CC=C2)C(F)C(F)C(F)C(F)C1 | 5,993                                     | 2 | 5 | 6 |  |
| S7524 | FR 180204 | 44084108 | g5 | L3500-08 | 327,34 | 865362-74-9  | ERK          | 65  | 199 | <1 | <a href="http://selleckchem.com/products/fr180204.html">http://selleckchem.com/products/fr180204.html</a>         | FR 180204 is an ATP-competitive, selective ERK inhibitor with Ki of 0.31 μM and 0.14 μM for ERK1 And ERK2, respectively. It is 30-fold less potent against the related kinase p38α and failed to inhibit any kinases(MEK1, MKK4, IKKα, PKCα, Src, Syc, and PDGFR) at less than 30 μM. | MAPK                    | C18H13N7        | free base | N/A | NC1=NNC2=C1C=C(N=N2)C1=C2C=CC=CN2N=C1C1=CC=C(C=C1)C(F)C(F)C(F)C(F)C1                       | 2,969                                     | 4 | 2 | 2 |  |
| S7525 | XMD8-92   | 43892044 | b6 | L3500-08 | 474,55 | 1234480-50-2 | ERK          | 73  | 154 | <1 | <a href="http://selleckchem.com/products/xmd8-92.html">http://selleckchem.com/products/xmd8-92.html</a>           | XMD8-92 is a potent and selective BMK1/ERK5 inhibitor with Kd of 80 nM.                                                                                                                                                                                                               | MAPK                    | C26H30N6O3      | free base | N/A | CCOC1=CC(=CC=C1NC1=NC2=C(C=C2)C(N)N(C)C(=O)C1=C(C=CC=C1)N2C1N(C)CC(C)C(C)C1                | 3,505                                     | 4 | 2 | 5 |  |
| S7526 | GNF-5     | 44121649 | c6 | L3500-08 | 418,37 | 778277-15-9  | Bcr-Abl      | 83  | 198 | <1 | <a href="http://selleckchem.com/products/gnf-5.html">http://selleckchem.com/products/gnf-5.html</a>               | GNF-5 is a selective and allosteric Bcr-Abl inhibitor with IC50 of 220 nM.                                                                                                                                                                                                            | Angiogenesis            | C20H17F3N4O3    | free base | N/A | OCCNC(=O)C1=CC=CC(=C1)C1=C(C=NC2=CC=C(C(OC(F)(F)C=C2)=N)C=N1)C(F)C(F)C(F)C(F)C1            | 4,876                                     | 4 | 3 | 8 |  |
| S7528 | GNE-7915  | 43471155 | d6 | L3500-08 | 443,4  | 1351761-44-8 | LRRK2        | 22  | 50  | <1 | <a href="http://selleckchem.com/products/gne-7915.html">http://selleckchem.com/products/gne-7915.html</a>         | GNE-7915 is a highly potent, selective, and brain-penetrable leucine-rich repeat kinase 2 (LRRK2) inhibitor, with IC50 and Ki of 9 nM and 1 nM, respectively.                                                                                                                         | Autophagy               | C19H21F4N5O3    | free base | N/A | CCNC1=NC(NC2=CC(F)=C(C=C2O)C)C(=O)N2CCOCC2)=NC=C1C(F)(F)F                                  | 3,052                                     | 5 | 2 | 7 |  |
| S7529 | ML323     | 42518114 | e6 | L3500-08 | 384,48 | 1572414-83-5 | DUB          | 76  | 198 | <1 | <a href="http://selleckchem.com/products/ml323.html">http://selleckchem.com/products/ml323.html</a>               | ML323 displays reversible, nanomolar inhibitory activity and excellent selectivity toward USP1/UAF1 with IC50 of 76 nM.                                                                                                                                                               | Ubiquitin               | C23H24N6        | free base | N/A | CC(C)C1=C(C(C=CC=C1)C1=NC(NC2=CC=C(C=C2)N2C=C(N)N2)=C(C)C)C=C1                             | 5,042                                     | 4 | 1 | 6 |  |
| S7531 | UMI-77    | 43465416 | f6 | L3500-08 | 468,34 | 518303-20-3  | Bcl-2        | 93  | 199 | <1 | <a href="http://selleckchem.com/products/umi-77.html">http://selleckchem.com/products/umi-77.html</a>             | UMI-77 is a selective Mcl-1 inhibitor with Ki of 490 nM, showing selectivity over other members of Bcl-2 family.                                                                                                                                                                      | Apoptosis               | C18H14BrNO5S2   | free base | N/A | OC(=O)CSC1=C(O)C2=C(C=CC=C2)C(NS(=O)(=O)C2=CC=C(C)C)C=C2                                   | 3,755                                     | 3 | 2 | 6 |  |

|       |                      |          |    |          |        |              |                           |     |     |    |                                                                                                                               |                                                                                                                                                                                                                             |                         |               |           |     |                                                                                                                               |       |    |   |    |
|-------|----------------------|----------|----|----------|--------|--------------|---------------------------|-----|-----|----|-------------------------------------------------------------------------------------------------------------------------------|-----------------------------------------------------------------------------------------------------------------------------------------------------------------------------------------------------------------------------|-------------------------|---------------|-----------|-----|-------------------------------------------------------------------------------------------------------------------------------|-------|----|---|----|
| S7534 | BAPTA-AM             | 43651067 | g6 | L3500-08 | 764,68 | 126150-97-8  | Others                    | 20  | 26  | <1 | <a href="http://selleckchem.com/products/bapta-am.html">http://selleckchem.com/products/bapta-am.html</a>                     | BAPTA-AM is a selective, membrane-permeable calcium chelator.                                                                                                                                                               | Others                  | C34H40N2O18   | free base | N/A | CC(=O)OCOC(=O)CNC(C(=O)O)COC(C(=O)C1=C(C(OCCOC2=C(C=CC=C2)N(CC(=O)OCOC(C)=O)CC(=O)OCOC(C)=O)CC(C)=O)C=C1C1=CC=C12)C=C12)C=C12 | 1,886 | 18 | 0 | 31 |
| S7539 | PTC-209 HBr          | 43452516 | b7 | L3500-08 | 576,1  | 1217022-63-3 | BMI-1                     | 100 | 174 | <1 | <a href="http://selleckchem.com/products/ptc-209-hbr.html">http://selleckchem.com/products/ptc-209-hbr.html</a>               | PTC-209 HBr is the hydrobromide salt of PTC-209, which is a potent and selective BMI-1 inhibitor with IC50 of 0.5 µM, and results in irreversible reduction of cancer-initiating cells (CICs).                              | Cell Cycle              | C17H14Br3N5OS | free base | N/A | Br.COC1=CC(Br)=C(NC2=NC(=CS2)C2=C(C)N=C3N=CC=C(N23)C(Br)1                                                                     | 5,362 | 4  | 1 | 4  |
| S7541 | Decemotinib (VX-509) | 43172612 | c7 | L3500-08 | 392,38 | 944842-54-0  | JAK                       | 78  | 199 | <1 | <a href="http://selleckchem.com/products/decemotinib-vx-509.html">http://selleckchem.com/products/decemotinib-vx-509.html</a> | Decemotinib (VX-509) is a potent and selective JAK3 inhibitor with Ki of 2.5 nM, >4-fold selectivity over JAK1, JAK2, and TYK2, respectively. Phase 2/3.                                                                    | JAK/STAT                | C18H19F3N6O   | free base | N/A | CC[C@@](C)(NC1=NC(=NC=C1)C1=CC2=NC=CC=C12)C(F)(F)F                                                                            | 2,747 | 4  | 3 | 7  |
| S7555 | 4SC-202              | 43908221 | d7 | L3500-08 | 447,51 | 910462-43-0  | HDAC                      | 89  | 199 | <1 | <a href="http://selleckchem.com/products/4sc-202.html">http://selleckchem.com/products/4sc-202.html</a>                       | 4SC-202 is a selective class I HDAC inhibitor with IC50 of 1.20 µM, 1.12 µM, and 0.57 µM for HDAC1, HDAC2, and HDAC3, respectively. Also displays inhibitory activity against Lysine Specific Demethylase 1 (LSD1). Phase 1 | Epigenetics             | C23H21N5O3S   | free base | N/A | CN1C=C(C=N1)C1=CC=C(C=C1)S(=O)(=O)N1C=CC(=O)NC2=CC=C(C2)N=C1                                                                  | 2,955 | 4  | 2 | 6  |
| S7557 | CL-387785 (EKI-785)  | 46340914 | e7 | L3500-08 | 381,23 | 194423-06-8  | EGFR                      | 63  | 165 | <1 | <a href="http://selleckchem.com/products/cl-387785-eki-785.html">http://selleckchem.com/products/cl-387785-eki-785.html</a>   | CL-387785 (EKI-785) is an irreversible, and selective EGFR inhibitor with IC50 of 370 pM.                                                                                                                                   | Protein Tyrosine Kinase | C18H13BrN4O   | free base | N/A | CC#CC(=O)NC1=CC2=C(NC3=CC(Br)=C3)N=CN=C2C1                                                                                    | 4,568 | 3  | 2 | 4  |
| S7566 | IM-12                | 44197302 | f7 | L3500-08 | 377,41 | 1129669-05-1 | GSK-3                     | 75  | 199 | <1 | <a href="http://selleckchem.com/products/im-12.html">http://selleckchem.com/products/im-12.html</a>                           | IM-12 is a selective GSK-3β inhibitor with IC50 of 53 nM, and also enhances canonical Wnt signaling.                                                                                                                        | PI3K/Akt/mTOR           | C22H20FN3O2   | free base | N/A | CN1C(=O)C(NCCC2=CC=C(F)C=C2)C(C1=O)C1=C(C)NC2=C1C=CC(F)1                                                                      | 3,074 | 2  | 2 | 5  |
| S7572 | A-366                | 43464914 | g7 | L3500-08 | 329,44 | 1527503-11-2 | Histone Methyltransferase | 65  | 197 | <1 | <a href="http://selleckchem.com/products/a-366.html">http://selleckchem.com/products/a-366.html</a>                           | A-366 is a potent and selective G9a/GLP histone lysine methyltransferase inhibitor with IC50 of 3.3nM, exhibiting >1000-fold selectivity for G9a/GLP over 21 other methyltransferases.                                      | Epigenetics             | C19H27N3O2    | free base | N/A | COC1=C(OCCCN2CCCC2)C=C2N=C(NC3(CCC3)C2=C1C1=CC=C1)C1=CC=C1                                                                    | 2,467 | 3  | 1 | 6  |
| S7573 | GSK2830371           | 43439964 | b8 | L3500-08 | 461,02 | 1404456-53-6 | phosphatase               | 92  | 200 | <1 | <a href="http://selleckchem.com/products/gsk2830371.html">http://selleckchem.com/products/gsk2830371.html</a>                 | GSK2830371 is an orally active, allosteric Wip1 phosphatase inhibitor with IC50 of 6 nM.                                                                                                                                    | Others                  | C23H29CIN4O2S | free base | N/A | CC1=NC=C(CI)C=C1NC1=CC=C(S1)C(=O)N(C@H)(CC1(C)C(C)C1)C(F)(F)F                                                                 | 4,064 | 3  | 3 | 9  |

|       |                             |          |    |          |        |                          |                           |    |     |    |     |                                                                                                                                         |                                                                                                                                                                                 |                        |               |                 |     |                                                                                        |       |   |   |    |
|-------|-----------------------------|----------|----|----------|--------|--------------------------|---------------------------|----|-----|----|-----|-----------------------------------------------------------------------------------------------------------------------------------------|---------------------------------------------------------------------------------------------------------------------------------------------------------------------------------|------------------------|---------------|-----------------|-----|----------------------------------------------------------------------------------------|-------|---|---|----|
| S7574 | GSK-LSD1 2HCl               | 44094082 | c8 | L3500-08 | 289,24 | 1431368-48-7 (free base) | Histone Demethylase       | 57 | 197 | 57 | 197 | <a href="http://selckchem.com/products/gsk-1-2hcl.html">http://selckchem.com/products/gsk-1-2hcl.html</a>                               | GSK-LSD1 2HCl is an irreversible, and selective LSD1 inhibitor with IC50 of 16 nM, > 1000 fold selective over other closely related FAD utilizing enzymes (LSD2, MAO-A, MAO-B). | Epigenetics            | C14H22Cl2N2   | dihydrochloride | N/A | Cl.C1C1[C@@H](NC2CCNCC2)[C@@H](C1)CC=CC=C1 [c:14,16,t:12]                              | 1,964 | 0 | 2 | 3  |
| S7577 | AGK2                        | 43438387 | d8 | L3500-08 | 434,27 | 304896-28-4              | Sirtuin                   | 10 | 23  | <1 |     | <a href="http://selckchem.com/products/aggk2.html">http://selckchem.com/products/aggk2.html</a>                                         | AGK2 is a potent, and selective SIRT2 inhibitor with IC50 of 3.5 μM that minimally affects either SIRT1 or SIRT3 at 10-fold higher levels.                                      | Cytoskeletal Signaling | C23H13Cl2N3O2 | free base       | N/A | C1C=CC=C(C)C(C)C1C1=CC=C(O1)C=C(C#N)C(=O)NC1=CC=C(C2C2N(C)C2)C1 [c:22,24,26,29,t:8,9]  | 5,641 | 3 | 1 | 4  |
| S7585 | SB-334867                   | 43467556 | e8 | L3500-08 | 319,32 | 792173-99-0              | OX Receptor               | 63 | 197 | <1 |     | <a href="http://selckchem.com/products/sb-334867.html">http://selckchem.com/products/sb-334867.html</a>                                 | SB-334867 is a selective orexin-1 (OX1) receptor antagonist.                                                                                                                    | GPCR & G Protein       | C17H13N5O2    | free base       | N/A | CC1=NC2=C(O1)C=C(NC(=O)NC1=CC=NC3=CC=CN=C3)C=C2 [c:3,15,19,25,t:1,7,13,17,21]          | 1,773 | 5 | 2 | 2  |
| S7589 | N6022                       | 43471491 | f8 | L3500-08 | 414,46 | 1208315-24-5             | Others                    | 82 | 198 | <1 |     | <a href="http://selckchem.com/products/n6022.html">http://selckchem.com/products/n6022.html</a>                                         | N6022 is a selective, and reversible inhibitor of S-nitrosoglutathione reductase (GSNOR) with IC50 of 8 nM and 5 μM. Phase 1/2.                                                 | Others                 | C24H22N4O3    | free base       | N/A | CC1=C(C=CC(=C1)C(N)=O)N1C(C=O)C(=O)C=C1C1=C(C=C(C1)N)C=O [c:5,17,19,24,26,30,32,t:1,2] | 3,664 | 3 | 1 | 7  |
| S7593 | Splitomicin                 | 44074208 | g8 | L3500-08 | 198,22 | 5690-03-9                | HDAC                      | 39 | 197 | <1 |     | <a href="http://selckchem.com/products/splitomicin.html">http://selckchem.com/products/splitomicin.html</a>                             | Splitomicin is a selective NAD(+)-dependent histone deacetylase Sir2p inhibitor with IC50 of 60 μM, showing a higher activity in a cell-based assay.                            | Epigenetics            | C13H10O2      | free base       | N/A | O=C1CCC2=C3C=CC=C3=CC=C2O1 [c:4,6,8,11,13]                                             | 2,831 | 2 | 0 | 0  |
| S7595 | Santacruzamate A (CAY10683) | 43973505 | b9 | L3500-08 | 278,35 | 1477949-42-0             | HDAC                      | 55 | 198 | <1 |     | <a href="http://selckchem.com/products/santacruzamate-a-cay10683.html">http://selckchem.com/products/santacruzamate-a-cay10683.html</a> | Santacruzamate A (CAY10683) is a potent and selective HDAC inhibitor with IC50 of 119 pM for HDAC2, >3600-fold selectivity over other HDACs.                                    | DNA Damage             | C15H22N2O3    | free base       | N/A | CCOC(=O)NCCCC(=O)NCCC=CC1 [c:16,18,t:14]                                               | 1,899 | 3 | 2 | 9  |
| S7596 | CAY10603                    | 44172378 | c9 | L3500-08 | 446,5  | 1045792-66-2             | HDAC                      | 89 | 199 | <1 |     | <a href="http://selckchem.com/products/cay10603.html">http://selckchem.com/products/cay10603.html</a>                                   | CAY10603 is a potent and selective HDAC6 inhibitor with IC50 of 2 pM, >200-fold selectivity over other HDACs.                                                                   | DNA Damage             | C22H30N4O6    | free base       | N/A | CC(C)(C)OC(=O)NC1=C(C=C(C1)C1=CC(=NO1)C(=O)NCCC(=O)N) [c:10,12,17,t:8,15]              | 3,23  | 6 | 3 | 12 |
| S7605 | Filgotinib (GLPG0634)       | 44094736 | d9 | L3500-08 | 425,5  | 1206161-97-8             | JAK                       | 85 | 200 | <1 |     | <a href="http://selckchem.com/products/filgotinib.html">http://selckchem.com/products/filgotinib.html</a>                               | Filgotinib (GLPG0634) is a selective JAK1 inhibitor with IC50 of 10 nM, 28 nM, 810 nM, and 116 nM for JAK1, JAK2, JAK3, and TYK2, respectively. Phase 2.                        | JAK/STAT               | C21H23N5O3S   | free base       | N/A | O=C(NC1=NN2C(C=CC=C2)C2=CC=C(CN3CCS(=O)(=O)CC3)C=C2)=N1)C1CC1 [c:7,9,26,28,t:3,12,14]  | 2,461 | 5 | 1 | 5  |
| S7611 | EI1                         | 43887924 | e9 | L3500-08 | 390,48 | 1418308-27-6             | Histone Methyltransferase | 42 | 108 | <1 |     | <a href="http://selckchem.com/p">http://selckchem.com/p</a>                                                                             | EI1 is a potent and selective EZH2 inhibitor with IC50 of 15 nM and 13 nM for EZH2 (WT) and EZH2 (Y641F), respectively.                                                         | Epigenetics            | C23H26N4O2    | free base       | N/A | CCC(CC)N1C=CC2=C(C=C(C=C12)C#N)C(=O)NCC1=C(C)C                                         | 3,54  | 2 | 2 | 6  |

|       |                              |          |     |          |        |              |                          |     |     |    |     |                                                                                                                                               |                                                                                                                                                                                                                                                                                                   |                         |               |                                                    |                                                                                                  |                                                                                                                    |        |   |   |   |
|-------|------------------------------|----------|-----|----------|--------|--------------|--------------------------|-----|-----|----|-----|-----------------------------------------------------------------------------------------------------------------------------------------------|---------------------------------------------------------------------------------------------------------------------------------------------------------------------------------------------------------------------------------------------------------------------------------------------------|-------------------------|---------------|----------------------------------------------------|--------------------------------------------------------------------------------------------------|--------------------------------------------------------------------------------------------------------------------|--------|---|---|---|
| S7612 | PX-478 2HCl                  | 44198803 | f9  | L3500-08 | 394,12 | 685898-44-6  | HIF                      | 78  | 198 | 78 | 198 | <a href="http://selleckchem.com/products/px-478-2hcl.html">http://selleckchem.com/products/px-478-2hcl.html</a>                               | PX-478 2HCl is an orally active, and selective hypoxia-inducible factor-1 $\alpha$ (HIF-1 $\alpha$ ) inhibitor. Phase 1.                                                                                                                                                                          | Angiogenesis            | C13H20Cl4N2O3 | dihydrochloride                                    | N/A                                                                                              | C1C1N(C@H)(CC1=C(C=C(C1)N+)(O)CC(C)CC(C)C(O)=O [c:5,7,t:3]                                                         | -0,251 | 1 | 1 | 8 |
| S7620 | GSK1324726A (I-BET726)       | 43091552 | g9  | L3500-08 | 434,91 | 1300031-52-0 | Epigenetic Reader Domain | 86  | 198 | <1 |     | <a href="http://selleckchem.com/products/gsk1324726a-i-bet726.html">http://selleckchem.com/products/gsk1324726a-i-bet726.html</a>             | GSK1324726A (I-BET726) is a highly selective inhibitor of BET family proteins with IC50 of 41 nM, 31 nM, and 22 nM for BRD2, BRD3 and BRD4, respectively.                                                                                                                                         | Epigenetics             | C25H23ClN2O3  | free base                                          | N/A                                                                                              | C[C@H]1C[C@@H](NC2=CC=C(C1)C=C2)C2=C(C=CC(=C2)C2=CC=C(C=C2)C(O)=O)N1C(C)=O [c:10,15,17,22,24,t:5,7,1]              | 4,648  | 2 | 1 | 4 |
| S7624 | SD-208                       | 42684102 | b10 | L3500-08 | 352,75 | 627536-09-8  | TGF-beta/Smad            | 9   | 26  | <1 |     | <a href="http://selleckchem.com/products/sd-208.html">http://selleckchem.com/products/sd-208.html</a>                                         | SD-208 is a selective TGF- $\beta$ RI (ALK5) inhibitor with IC50 of 48 nM, >100- fold selectivity over TGF- $\beta$ RII.                                                                                                                                                                          | TGF-beta/Smad           | C17H10ClF6N6  | free base                                          | N/A                                                                                              | FC1=CC=C(C)C=C1C1=NC2=NC=CN=C2C(C)C1=CC(=O)N1C(C)=O [c:10,15,22,24,t:1,3,9]                                        | 3,139  | 5 | 1 | 3 |
| S7625 | Niraparib (MK-4827) tosylate | 44141994 | c10 | L3500-08 | 492,59 | 1038915-73-9 | PARP                     | 98  | 199 | <1 |     | <a href="http://selleckchem.com/products/mk-4827-niraparib-tosylate.html">http://selleckchem.com/products/mk-4827-niraparib-tosylate.html</a> | Niraparib (MK-4827) tosylate is a selective inhibitor of PARP1/PARP2 with IC50 of 3.8 nM/2.1 nM.                                                                                                                                                                                                  | DNA Damage              | C26H28N4O4S   | 4-methylbenzenesulfonyl tosylate, MK 4827 tosylate | CC1=CC=C(C=C1)S(O)(=O)O.NC(=O)C1=CC=CC=C1N(C=C1)C=C(C@H)1CCN(C1)C [c:1,16,27,29,t:1,14,18,19,20] | 4,267                                                                                                              | 2      | 2 | 4 |   |
| S7631 | TH287                        | 43443491 | d10 | L3500-08 | 269,13 | 1609960-30-6 | MTH1                     | 53  | 197 | <1 |     | <a href="http://selleckchem.com/products/th287.html">http://selleckchem.com/products/th287.html</a>                                           | TH287 is a potent and selective MTH1 (NUDT1) inhibitor with IC50 of 0.8 nM.                                                                                                                                                                                                                       | DNA Damage              | C11H10Cl2N4   | free base                                          | N/A                                                                                              | CNC1=CC(=NC(N)=N1)C1=C(C)C(C)=CC=C1 [c:4,7,10,14,16,t:2]                                                           | 3,449  | 2 | 2 | 2 |
| S7632 | TH588                        | 43469282 | e10 | L3500-08 | 295,17 | 1609960-31-7 | MTH1                     | 20  | 68  | <1 |     | <a href="http://selleckchem.com/products/th588.html">http://selleckchem.com/products/th588.html</a>                                           | selective MTH1 (NUDT1) inhibitor with IC50 of 5 nM. It has no relevant inhibition of any of the other tested proteins at 100 $\mu$ M, although TH588 showed reasonable selectivity when tested on a much larger panel of 87 enzymes, GPCRs, kinases, ion channels and transporters at 10 $\mu$ M. | DNA Damage              | C13H12Cl2N4   | free base                                          | N/A                                                                                              | NC1=NC(=CC(NC2CC2)=N1)C1=C(C)C(C)=CC=C1 [c:4,10,13,17,19,t:1]                                                      | 3,938  | 2 | 2 | 3 |
| S7638 | LDC1267                      | 44178868 | f10 | L3500-08 | 560,55 | 1361030-48-9 | TAM Receptor             | 100 | 178 | <1 |     | <a href="http://selleckchem.com/products/lc1267.html">http://selleckchem.com/products/lc1267.html</a>                                         | LDC1267 is a highly selective TAM kinase inhibitor with IC50 of <5 nM, 8 nM, and 29 nM for Mer, Tyro3, and Axl, respectively. Displays lower activity against Met, Aurora B, Lck, Src, and CDK8.                                                                                                  | Protein Tyrosine Kinase | C30H26F2N4O5  | free base                                          | N/A                                                                                              | CCOC1=CN(N=C1C(=O)N1)C1=CC=C(C1OC2=CC=CC(=O)C=C2)C(F)=C1C1=CC=C(F)C=C1C [c:6,19,34,42,t:3,12,14,17,21,25,29,37,39] | 6,213  | 7 | 1 | 9 |
| S7651 | SB225002                     | 44089774 | g10 | L3500-08 | 352,14 | 182498-32-4  | CXCR                     | 70  | 199 | <1 |     | <a href="http://selleckchem.com/products/sb225002.html">http://selleckchem.com/products/sb225002.html</a>                                     | SB225002 is a potent, and selective CXCR2 antagonist with IC50 of 22 nM for inhibiting interleukin IL-8 binding to CXCR2, > 150-fold selectivity over the other 7-TMRs tested.                                                                                                                    | GPCR & G Protein        | C13H10BrN3O4  | free base                                          | N/A                                                                                              | OC1=CC(=CC=C1NC(=O)N1=C1B                                                                                          | 2,923  | 1 | 3 | 3 |

|       |                                |          |     |          |        |              |                           |     |     |    |                                                                                                                                                 |                                                                                                                                                                                                                                                                                                                      |                         |               |           |           |  |  |  |                                                                      |                                                                                                                                                             |                                                                                                                                   |       |   |   |    |
|-------|--------------------------------|----------|-----|----------|--------|--------------|---------------------------|-----|-----|----|-------------------------------------------------------------------------------------------------------------------------------------------------|----------------------------------------------------------------------------------------------------------------------------------------------------------------------------------------------------------------------------------------------------------------------------------------------------------------------|-------------------------|---------------|-----------|-----------|--|--|--|----------------------------------------------------------------------|-------------------------------------------------------------------------------------------------------------------------------------------------------------|-----------------------------------------------------------------------------------------------------------------------------------|-------|---|---|----|
|       |                                |          |     |          |        |              |                           |     |     |    | chem.com/p<br>roducts/sb22<br>5002.html                                                                                                         |                                                                                                                                                                                                                                                                                                                      |                         |               |           |           |  |  |  |                                                                      | <chem>[C@@]1(C)N(C(=O)O)C(C)C1</chem>                                                                                                                       |                                                                                                                                   |       |   |   |    |
| S7655 | CB-839                         | 42600551 | b11 | L3500-08 | 571,57 | 1439399-58-2 | Glutaminase               | 100 | 175 | <1 | <a href="http://selleckchem.com/p/roducts/cb-839.html">http://selleckchem.com/p/roducts/cb-839.html</a>                                         | CB-839 is a potent, selective, and orally bioavailable glutaminase inhibitor with IC50 of 24 nM for recombinant human GAC. Phase 1.                                                                                                                                                                                  | Proteas<br>s            | C26H24F3N7O3S | free base | N/A       |  |  |  |                                                                      |                                                                                                                                                             | <chem>FC(F)(F)OC1=CC(CC(=O)NC2=CC=C(CCCC3=NN=C(NC(=O)CC4=C(C=CC=N4)S3)N=N2)=CC=C1</chem><br>[c:30,32,37,39,41,t:5,12,14,20,22,28] | 5,597 | 8 | 2 | 13 |
| S7656 | CPI-360                        | 44088850 | c11 | L3500-08 | 437,53 | 1802175-06-9 | Histone Methyltransferase | 20  | 46  | <1 | <a href="http://selleckchem.com/p/roducts/cpi-360.html">http://selleckchem.com/p/roducts/cpi-360.html</a>                                       | CPI-360 is a potent, selective, and SAM- competitive EZH1 inhibitor with IC50 of 102.3 nM, >100-fold selectivity over other methyltransferases.                                                                                                                                                                      | Epigeneti<br>cs         | C25H31N3O4    | free base | N/A       |  |  |  |                                                                      |                                                                                                                                                             | <chem>COC1=C(CNC(=O)C2=C(C)N(C@H)(C)C3CCOCC3)C3=C2C=CC=C3</chem><br><chem>C(=O)NC(C)=C1</chem><br>[c:2,8,21,24,26,33]             | 2,071 | 4 | 2 | 6  |
| S7668 | Picropodophyllin (PPP)         | 44127321 | d11 | L3500-08 | 414,41 | 477-47-4     | IGF-1R                    | 82  | 198 | <1 | <a href="http://selleckchem.com/p/roducts/picropodophyllin-ppp.html">http://selleckchem.com/p/roducts/picropodophyllin-ppp.html</a>             | Picropodophyllin (PPP) is a IGF-1R inhibitor with IC50 of 1 nM. It displays selectivity for IGF-1R and does not coinhibit tyrosine phosphorylation the IR, or of a selected panel of receptors less related to IGF-1R(FGF- R, PDGF- R, OR EGF- R).                                                                   | Protein Tyrosine Kinase | C22H22O8      | free base | AXL1717   |  |  |  |                                                                      | <chem>[H]C@112COC(=O)C@ @11(H)C @H](C1=CC(OC)=C(OC)C(OC)=C1</chem><br><chem>C1=CC3=C(OCOC3)C=C1</chem><br><chem>C@H]2 O</chem><br>[r:c:20,31,t:10,14,23,25] | 2,111                                                                                                                             | 7     | 1 | 4 |    |
| S7674 | Savolitinib(AZD6094, HMPL-504) | 44050817 | e11 | L3500-08 | 345,36 | 1313725-88-0 | c-Met                     | 16  | 46  | <1 | <a href="http://selleckchem.com/p/roducts/hmpl-504-azd6094-volitinib.html">http://selleckchem.com/p/roducts/hmpl-504-azd6094-volitinib.html</a> | Savolitinib (volitinib, AZD6094, HMPL-504) is a novel, potent, and selective MET inhibitor currently in clinical development in various indications, including PRCC. The IC50 values of this compound for c-Met and p-Met are 5 nM and 3 nM, respectively. It shows exquisite selectivity for c-Met over 274 kinase. | Protein Tyrosine Kinase | C17H15N9      | free base | Volitinib |  |  |  | <chem>C[C@H](N1N=NC2=NC=C(C12)C1=CN(C)N=C1)C1=CN2C=CN=C2 C=C1</chem> | 1,032                                                                                                                                                       | 6                                                                                                                                 | 0     | 3 |   |    |
| S7680 | SP2509                         | 43462904 | f11 | L3500-08 | 437,9  | 1423715-09-6 | Histone Demethylase       | 38  | 87  | <1 | <a href="http://selleckchem.com/p/roducts/sp2509.html">http://selleckchem.com/p/roducts/sp2509.html</a>                                         | SP2509 is a selective histone demethylase LSD1 inhibitor with IC50 of 137nM, showing no activity against MAO-A, MAO-B, lactate dehydrogenase and glucose oxidase.                                                                                                                                                    | Epigeneti<br>cs         | C19H20ClN3O5S | free base | HCl-2509  |  |  |  |                                                                      | <chem>C/C(=N/N(C(=O)C1=CC=CC=C1)S(=O)(=O)N1CCOCC1)C1=CC(C)=C C=C1O</chem><br>[c:8,10,26,28,t:6,23]                                                          | 1,891                                                                                                                             | 5     | 2 | 5 |    |
| S7683 | PIK-III                        | 44088304 | g11 | L3500-08 | 319,36 | 1383716-40-2 | Autophagy, PI3K           | 63  | 197 | <1 | <a href="http://selleckchem.com/p/roducts/pik-iii.html">http://selleckchem.com/p/roducts/pik-iii.html</a>                                       | PIK-III, which is a selective inhibitor of VPS34 enzymatic activity, inhibits autophagy and de novo lipidation of LC3 and leads to the stabilization of autophagy substrates. The IC50 values for VPS34 and PI(3)K6 are 0.018 µM and 1.2 µM respectively.                                                            | Autophagy               | C17H17N7      | free base | VPS34-IN2 |  |  |  |                                                                      | <chem>NC1=NC=C(C(C2CC2)=N1)C1=C(C=NC(NC2=CC=NC=C2)N1)</chem><br>[c:10,15,21,23,25,t:1,13,19]                                                                | 2.2                                                                                                                               | 5     | 2 | 5 |    |



**Supplementary Table 4:** Summary of a comparison of the differences between protocols that used commercially available or custom-made plates.

| Microwell plate, Cell type and numbers                        | Coating               | Organoid type      | EB  | Cultured in                     | Embedding | Homogeneity | Duration (Days) | Cryo-preservation | Application and purpose                                                                                                            | Ref.         |
|---------------------------------------------------------------|-----------------------|--------------------|-----|---------------------------------|-----------|-------------|-----------------|-------------------|------------------------------------------------------------------------------------------------------------------------------------|--------------|
| ULA 384-well plate; <b>hESCs</b> ; 400, 2000 or 10000         | Pluronic F-127        | Embryoid bodies    | yes | No transfer                     | yes       | Consistent  | 4               | no                | None; High-throughput method to produce EBs                                                                                        | 1            |
| Custom agarose microwell; <b>hESCs and iPSCs</b> ; 5000-45000 | no                    | Embryoid bodies    | yes | Petri dishes                    | no        | Consistent  | 20              | no                | None; High-throughput method to produce EBs                                                                                        | 2            |
| PDMS microwell arrays; <b>iPSCs</b> ; N/A                     | no                    | Brain organoids    | yes | 6 well plate                    | yes       | Variable    | 30              | no                | None; Simplified high-throughput method to produce brain organoids                                                                 | 3            |
| 3D printed PDMS; <b>hESCs</b> ; 200000                        | mPEG, lipidure or BSA | Cerebral organoids | yes | T25 flask                       | no        | Consistent  | 45              | no                | None; To produce uniform and mature cerebral organoids                                                                             | 4            |
| eNUVIO EB-Disks; <b>iPSCs</b> ; ~1500                         | no                    | Midbrain organoids | yes | Spinner flask                   | yes       | Consistent  | 100             | no                | None; High-throughput method to produce midbrain organoids                                                                         | 5            |
| ULA 384-well plate; <b>iPSCs</b> ; 1000                       | no                    | Cerebral organoids | yes | Pillar plates                   | yes       | Variable    | 31              | no                | None; High-throughput and short method to produce cerebral organoids                                                               | 6            |
| AggreWell™800; <b>hESCs and iPSCs</b> ; 2000                  | no                    | Cerebral organoids | yes | 24 wells plate                  | yes       | Variable    | 25              | no                | Compare human, gorilla and chimpanzee brain organoids; To investigate the human brain expansion mechanisms                         | 7            |
| AggreWell™400; <b>hESCs and iPSCs</b> ; 1000                  | no                    | Midbrain organoids | yes | 6 wells plate on orbital shaker | no        | N/A         | 21              | no                | None; To produce dopaminergic neurons in midbrain organoids                                                                        | 8            |
| AggreWell™800; <b>iPSCs</b> ; 10000                           | no                    | Cortical organoids | no  | Petri dishes                    | no        | Consistent  | 100             | no                | None; High-throughput method to reliably produce cortical organoids                                                                | 9            |
| AggreWell™800; <b>iPSCs</b> ; N/A                             | Rinsing Solution      | Asteroids          | no  | 96-wells plate                  | no        | N/A         | 21              | no                | Drug screening in tauopathy; To model tauopathy and test a treatment                                                               | 10           |
| Custom-made COC plate; <b>iPSCs</b> ; 10000                   | no                    | Brain organoids    | no  | Spinner bioreactor              | no        | Consistent  | 150             | yes               | Modeling of microcephaly, glioma invasion, and drug screening; High-throughput and reproducible method to generate brain organoids | Current work |



**Supplementary Table 5 hiPSC details**

| Name       | Donor species | Cell type | Karyotyp | Gender | Source                                                                                              |
|------------|---------------|-----------|----------|--------|-----------------------------------------------------------------------------------------------------|
| Crx-iPS    | Homo sapiens  | hiPSC     | 46, XX   | female | Generated by Laboratory of Olivier Goureau and published in doi: 10.1155/2019/7858796 <sup>11</sup> |
| TUBA1B-GFP | Homo sapiens  | hiPSC     | 46, XY   | male   | Allen Cell Collection at Coriell, Cat. No.: AICS 0012                                               |
| IMR90-1    | Homo sapiens  | hiPSC     | 46, XX   | female | Commercially available at WiCell, ID: WISCi004-A iPS(IMR90) clone (#1)                              |
| TUBA1B-RFP | Homo sapiens  | hiPSC     | 46, XY   | male   | Allen Cell Collection at Coriell, Cat. AICS-0031-035                                                |
| CSB-GM739  | Homo sapiens  | hiPSC     | 46, XY   | male   | Generated by the Laboratory of Alyson Muotri                                                        |
| CDK5RAP2   | Homo sapiens  | hiPSC     | 46, XY   | male   | Reprogrammed in this work                                                                           |

All cell lines were maintained in mTeSR1 medium on Matrigel-coated tissue-culture dishes.

#### References:

1. Ungrin, M. D., Joshi, C., Nica, A., Bauwens, C. & Zandstra, P. W. Reproducible, ultra high-throughput formation of multicellular organization from single cell suspension-derived human embryonic stem cell aggregates. *PLoS one* **3**, e1565 (2008). <https://doi.org/10.1371/journal.pone.0001565>
2. Pettinato, G., Wen, X. & Zhang, N. Formation of well-defined embryoid bodies from dissociated human induced pluripotent stem cells using microfabricated cell-repellent microwell arrays. *Scientific reports* **4**, 7402 (2014). <https://doi.org/10.1038/srep07402>
3. Zhu Y, Wang L, Yu H, et al. In situ generation of human brain organoids on a micropillar array. *Lab Chip*. 2017;17(17):2941-2950. doi:10.1039/c7lc00682a
4. Chen, Cheng et al. "A matrigel-free method to generate matured human cerebral organoids using 3D-Printed microwell arrays." *Bioactive materials* vol. 6,4 1130-1139. 20 Oct. 2020, doi:10.1016/j.bioactmat.2020.10.003
5. Mohamed, N. V. et al. Microfabricated disk technology: Rapid scale up in midbrain organoid generation. *Methods* **203**, 465-477 (2022). <https://doi.org/10.1016/j.ymeth.2021.07.008>
6. Acharya, P. et al. Uniform cerebral organoid culture on a pillar plate by simple and reproducible spheroid transfer from an ultralow attachment well plate. *Biofabrication* **16** (2024). <https://doi.org/10.1088/1758-5090/ad1b1e>

7. Benito-Kwieceński, S. et al. An early cell shape transition drives evolutionary expansion of the human forebrain. *Cell* **184**, 2084-2102.e2019 (2021). <https://doi.org:10.1016/j.cell.2021.02.050>
8. Tieng, V. et al. Engineering of midbrain organoids containing long-lived dopaminergic neurons. *Stem cells and development* **23**, 1535-1547 (2014). <https://doi.org:10.1089/scd.2013.0442>
9. Yoon, S. J. et al. Reliability of human cortical organoid generation. *Nature methods* **16**, 75-78 (2019). <https://doi.org:10.1038/s41592-018-0255-0>
10. Rickner, H. D. et al. Single cell transcriptomic profiling of a neuron-astrocyte assembloid tauopathy model. *Nature communications* **13**, 6275 (2022). <https://doi.org:10.1038/s41467-022-34005-1>
11. Slembrouck-Brec A. et al. Reprogramming of adult retinal müller glial cells into human-induced pluripotent stem cells as an efficient source of retinal cells." *Stem cells international* vol. **7858796**, (2019) [doi:10.1155/2019/7858796](https://doi.org:10.1155/2019/7858796)
