# Supplementary material for: Reliability of high-quantity human brain organoids for modeling microcephaly, glioma invasion and drug screening
Source: PubMed Central journal article supplement (PMC11659410; doi:10.1038/s41467-024-55226-6), 2024-12-19
Supplement: 41467_2024_55226_MOESM3_ESM.pdf [file 41467_2024_55226_MOESM3_ESM.pdf]

## **Description of Additional Supplementary Files**

**Supplementary Movie 1:** Spinner flasks culturing Hi-Q brain organoids

**Supplementary Movie 2:** Day 20 organoids, PSD95

**Supplementary Movie 3:** Day 20 organoids, SOX2 and DCX

**Supplementary Movie 4:** Day 20 Synapsin

**Supplementary Movie 5:** Day 20 Acetylated alpha-tubulin and MAP2

**Supplementary Movie 6:** Day 20 PSD95

**Supplementary Movie 7:** Day 20 organoids, Tau and PCP4

**Supplementary Movie 8:** Day 60 organoids, Acetylated alpha-tubulin and MAP2

**Supplementary Movie 9:** Day 60 organoids, Actin and P-vimentin

**Supplementary Movie 10:** Day 60 organoids, Nestin and TUJ1

**Supplementary Movie 11:** Day 60 organoids, Pax6 and CTIP2

**Supplementary Movie 12:** Day 60 organoids, SOX2 and DCX

**Supplementary Movie 13:** Day 60 organoids, Synapsin

**Supplementary Movie 14:** Day 60 organoids, Tau and PCP4

**Supplementary Movie 15:** Control Day 30 never frozen organoids

**Supplementary Movie 16:** Post thaw Day 30 organoids. Example 1

**Supplementary Movie 17:** Post thaw Day 30 organoids. Example 2
